# Supplementary material
Source: PubMed Central journal article supplement (PMC5548179)
Supplement: NIHMS878709-supplement-Experimentals___Spectra.pdf [file NIHMS878709-supplement-Experimentals___Spectra.pdf]

**Rapid Assembly of Complex Cyclopentanes Employing Chiral,  $\alpha,\beta$ -Unsaturated  
Acylammonium Intermediates.**

*Gang Liu, Morgan E. Shirley, Khoi N. Van, Rae Lynn McFarlin, and Daniel Romo\**

Department of Chemistry, Texas A&M University, P.O. Box 30012, College Station,  
TX 77842-3012

**Supporting Information**

|                                                                           |           |
|---------------------------------------------------------------------------|-----------|
| <b>General Procedures, Abbreviation List, Hazard Warning</b>              | S2-S3     |
| <b>Experimental Procedures</b>                                            | S4-S48    |
| <b>NCMAL Optimization Studies</b>                                         | S48-S49   |
| <b><math>^1\text{H}</math> and <math>^{13}\text{C}</math> NMR spectra</b> | S50-S89   |
| <b>Chiral GC traces of 4a-c, e, f</b>                                     | S90-S91   |
| <b>Chiral HPLC traces of 14c-e, k-m, p, q, s, 23</b>                      | S92-S103  |
| <b>X-Ray Structures and Select Crystallographic Data</b>                  | S104-S122 |

## General Procedures

All non-aqueous reactions were performed under a nitrogen atmosphere in oven-dried glassware. Dichloromethane ( $\text{CH}_2\text{Cl}_2$ ) was dried by passing through activated molecular sieves or alumina (solvent purification system). Tetrahydrofuran (THF) was distilled over sodium and benzophenone. Diisopropylethylamine  $\text{EtN}(\text{iPr})_2$  was distilled from potassium hydroxide prior to use. Other solvents and reagents were used as received from commercially available sources. Deuterated solvents were purchased from either Aldrich or Cambridge Isotopes and used as received.  $^1\text{H}$  NMR spectra were measured at 500 MHz and 300 MHz and referenced relative to residual chloroform (7.26 ppm) or benzene (7.16 ppm) and were reported in parts per million. Coupling constants ( $J$ ) were reported in Hertz (Hz), with multiplicity reported following usual convention: s, singlet; d, doublet; t, triplet; q, quartet; dd, doublet of doublets; ddd, doublet of doublet of doublets; dddd, doublet of doublet of doublet of doublets; dt, doublet of triplets; dq, doublet of quartets; ddq, doublet of doublet of quartets; ddddt, doublet of doublet of doublet of doublet of triplets; qq, quartet of quartets; qdd, quartet of doublet of doublets; m, multiplet; bs, broad singlet.  $^{13}\text{C}$  NMR spectra were measured at 125 MHz and 75 MHz and referenced relative to residual chloroform (77.23 ppm) or benzene (128.06 ppm) and were reported in parts per million (ppm). Flash column chromatography was performed with 60Å Silica Gel (230-400 mesh) as stationary phase using a gradient solvent system or on an automated flash chromatography system (EtOAc/hexanes as eluent unless indicated otherwise). High resolution mass spectra (ESI) were obtained through the Laboratory for Biological Mass Spectrometry (Texas A&M University). Thin Layer Chromatography (TLC) was performed using glass-backed silica gel F254 (Silicycle, 250  $\mu\text{m}$  thickness). Visualization of developed plates was performed by fluorescence quenching or by staining with phosphomolybdic acid (PMA), potassium permanganate ( $\text{KMnO}_4$ ), *p*-anisaldehyde or cerium sulfate. *Fourier* Transform Infrared (FTIR) spectra were recorded as thin films on NaCl plates. Optical rotations were recorded on a polarimeter at 589 nm employing a 25 mm cell. High Performance Liquid Chromatography (HPLC) was performed on a chromatographic system using various chiral columns (25 cm) as noted. Gas Chromatography (GC) was performed on a gas chromatographic

system using a chiral column as noted. X-ray diffraction was obtained by the X-ray Diffraction Laboratory at Texas A&M University.

**Hazard Warning:**

Ozonides produced from the oxidative cleavage were reduced using excess dimethyl sulfide. Stirring for at least 9 h at room temperature prior to work-up ensured complete ozonide reduction.

(*S*)-(+)-HBTM was synthesized according to the literature procedure.<sup>1</sup> (–)-BTM was purchased from TCI chemicals and used as received. All unsaturated acid chlorides were purchased from Sigma-Aldrich and used as received without further purification.

**Abbreviation list**

|                                |   |                                    |
|--------------------------------|---|------------------------------------|
| 4-PPY                          | = | 4-Pyrrolidinopyridine              |
| 9-AJ                           | = | 9-azajulolidine                    |
| DBU                            | = | 1,8-diazabicyclo[5.4.0]undec-7-ene |
| DMAP                           | = | 4-(Dimethylamino)pyridine          |
| DMS                            | = | dimethyl sulfide                   |
| EtN( <i>i</i> Pr) <sub>2</sub> | = | <i>N,N</i> -diisopropylethylamine  |
| HBTM                           | = | homobenzotetramisole               |
| BTM                            | = | benzotetramisole                   |
| LDA                            | = | lithium bis(trimethylsilyl)amide   |
| LiHMDS                         | = | lithium bis(trimethylsilyl)amide   |
| TsCl                           | = | 4-toluenesulfonyl chloride         |

---

<sup>1</sup> Birman, V. B. & Li, X. Homobenzotetramisole: an effective catalyst for kinetic resolution of aryl-cycloalkanols. *Org. Lett.* **10**, 1115-1118 (2008).

## Experimental Procedures

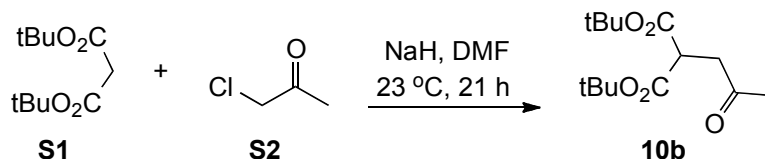

**Di-tert-butyl 2-(2-oxopropyl)malonate (10b).** To an oven dried, round-bottomed flask was added NaH 60% in mineral oil (0.49 g, 9.83 mmol, 1.25 equiv.) and 20 mL anhydrous DMF. The flask was then cooled to 0 °C with an ice bath and di-*tert*-butyl malonate (**S1**, 2.0 mL, 8.94 mmol, 1.00 equiv.) was added dropwise. After 25 min, chloroacetone (**S2**, 1.08 mL, 13.40 mmol, 1.50 equiv.) was added dropwise and the ice bath removed and allowed to warm up to ambient temperature (23 °C). After 21 h the reaction mixture was cooled to 0 °C with an ice bath and 10 mL of sat. NH<sub>4</sub>Cl was added slowly. The mixture was warmed to ambient temperature (23 °C), extracted with EtOAc (4 x 15 mL), and the combined organic extracts were then washed with water (15 mL) and brine (15 mL). The organic layer was collected and dried over MgSO<sub>4</sub>, filtered, concentrated by rotary evaporation, and purified by flash column chromatography (gradient SiO<sub>2</sub>, 20 → 60% EtOAc/hexanes) to afford keto diester **10b** (1.46 g, 60%) as a colorless oil: TLC (EtOAc:hexanes, 5:5 v/v):  $R_f = 0.80$ ; <sup>1</sup>H NMR (500 MHz; CDCl<sub>3</sub>): δ 3.68 (t,  $J = 7.2$  Hz, 1H), 2.95 (d,  $J = 7.2$  Hz, 2H), 2.20 (s, 3H), 1.45 (s, 18H); <sup>13</sup>C NMR (125 MHz; CDCl<sub>3</sub>): δ 205.1, 168.1(2), 81.7(2), 49.0, 42.0, 29.8, 27.8(6); IR (thin film): 2982, 2928, 1726 cm<sup>-1</sup>; HRMS (ESI+)  $m/z$  calcd. for C<sub>14</sub>H<sub>24</sub>LiO<sub>5</sub> [M+Li]<sup>+</sup>: 279.1784; found 279.1781.

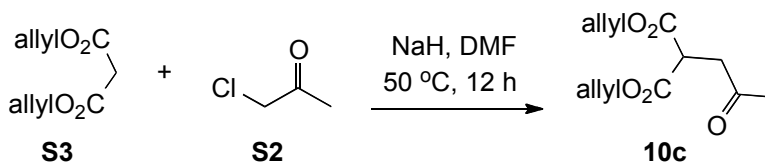

**Diallyl 2-(2-oxopropyl)malonate (10c).** To an oven dried, round-bottomed flask was added NaH 60% in mineral oil (1.16 g, 28.97 mmol, 1.06 equiv.) and then 50 mL



anhydrous DMF followed by dropwise addition of diallyl malonate<sup>2</sup> (**S3**, 5.00 g, 27.14 mmol, 1.00 equiv.) at ambient temperature (23 °C). After 25 min, chloroacetone (**S2**, 6.55 mL, 81.41 mmol, 3.00 equiv.) was added dropwise and the reaction mixture was heated to 50 °C for 12 h, after which time it was allowed to cool to ambient temperature (23 °C) and 15 mL of sat. NH<sub>4</sub>Cl was added. The mixture was extracted with EtOAc (4 x 20 mL) and then washed with water (20 mL) and brine (20 mL). The organic layers were combined and dried over MgSO<sub>4</sub>, filtered, concentrated by rotary evaporation, and purified by flash column chromatography (gradient SiO<sub>2</sub>, 20 → 60% EtOAc/hexanes) to afford keto diester **10c** (4.24 g, 65%) as a colorless oil: TLC (EtOAc:hexanes, 1:9 v/v): *R<sub>f</sub>* = 0.75; <sup>1</sup>H NMR (500 MHz; CDCl<sub>3</sub>): δ 5.93-5.86 (m, 2H), 5.35 (q, *J* = 1.5 Hz, 1H), 5.31 (q, *J* = 1.5 Hz, 1H), 5.26 (q, *J* = 1.3 Hz, 1H), 5.24 (q, *J* = 1.3 Hz, 1H), 4.65 (m, 2H), 4.63 (m, 2H), 3.94 (t, *J* = 7.1 Hz, 1H), 3.09 (d, *J* = 7.2 Hz, 2H), 2.21 (s, 3H); <sup>13</sup>C NMR (125 MHz; CDCl<sub>3</sub>): δ 205.0, 168.7(2), 131.6(2), 119.0(2), 66.5(2), 47.1, 42.3, 30.0; IR (thin film): 3081, 2951, 1741 cm<sup>-1</sup>; HRMS (ESI+) *m/z* calcd. for C<sub>12</sub>H<sub>16</sub>LiO<sub>5</sub> [M+Li]<sup>+</sup>: 247.1158; found 247.1149.

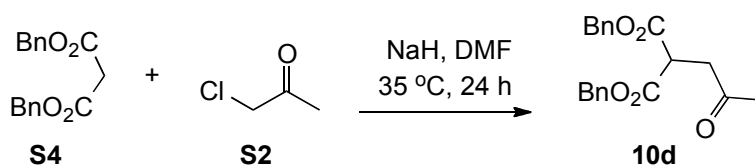

**Dibenzyl 2-(2-oxopropyl)malonate (10d).** To an oven dried, round-bottomed flask containing dibenzyl malonate (**S4**, 2.50 mL, 11.96 mmol, 1.00 equiv.) in 24 mL of anhydrous DMF at 0 °C was slowly added NaH 60% in mineral oil (0.51 g, 12.75 mmol, 1.07 equiv.). After 5 min at 0 °C chloroacetone (**S2**, 2.88 mL, 35.88 mmol, 3.00 equiv.) was added dropwise and the reaction mixture was heated at 35 °C for 24 h, after which time it was allowed to cool to ambient temperature (23 °C) and 15 mL of sat. NH<sub>4</sub>Cl was added. The mixture was extracted with EtOAc (4 x 20 mL) and then washed with water (20 mL) and brine (20 mL). The organic layers were combined and dried over MgSO<sub>4</sub>, filtered, concentrated by rotary evaporation, and purified by flash

<sup>2</sup> Jana, R., Trivedi, R. & Tunge, J. A. Mild decarboxylative allylation of coumarins. *Org. Lett.* **11**, 3434-3436 (2009).

column chromatography (SiO<sub>2</sub>, 10 → 60% EtOAc/hexanes) to afford keto diester **10d** (1.90 g, 47%) as a colorless oil: TLC (EtOAc:hexanes, 3:7 v/v): R<sub>f</sub> = 0.45; <sup>1</sup>H NMR (500 MHz; CDCl<sub>3</sub>): δ 7.31-7.27 (m, 5H), 7.26-7.24 (m, 5H), 5.17 (s, 2H), 5.11 (s, 2H), 3.96 (t, *J* = 7.1 Hz, 1H), 3.06 (d, *J* = 7.1 Hz, 2H), 2.13 (s, 3H); <sup>13</sup>C NMR (125 MHz; CDCl<sub>3</sub>): δ 204.9, 168.7, 135.3, 128.7, 128.5, 128.3, 67.6, 47.1, 42.1, 29.8; IR (thin film): 1753, 1726, 1270, 1226, 1152 cm<sup>-1</sup>; HRMS (ESI+) *m/z* calcd. for C<sub>20</sub>H<sub>20</sub>LiO<sub>5</sub> [M+Li]<sup>+</sup>: 347.1471; found 347.1476.

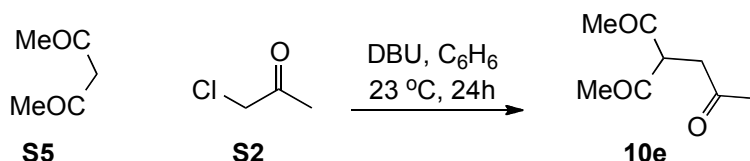

**3-Acetylhexane-2,5-dione (10e).** In an oven dried, 250 mL round-bottomed flask was added acetylacetone (**S5**, 5.0 g, 49.98 mmol, 1.00 equiv.) dissolved in 100 mL of spectra grade benzene. DBU (7.5 mL, 49.98 mmol, 1.00 equiv.) was slowly added to the solution. Upon completion of the addition, chloroacetone (**S2**, 5.23 mL, 64.97 mmol, 1.30 equiv.) was added dropwise and the reaction mixture was stirred for 24 h at ambient temperature (23 °C). The reaction mixture was then diluted with CH<sub>2</sub>Cl<sub>2</sub> (40 mL), washed with brine (50 mL), dried over Na<sub>2</sub>SO<sub>4</sub>, and concentrated by rotary evaporation. Flash column chromatography (SiO<sub>2</sub>, 10 → 40% EtOAc/hexanes) afforded triketone **10e** (2.34 g, 30%) as a yellow oil. All characterization data was in accordance with previously reported data for this compound.<sup>3</sup>

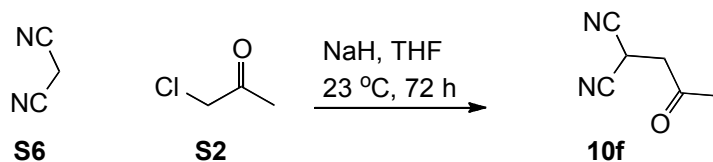

**2-(2-Oxopropyl)malononitrile (10f).** In an oven dried 250 mL round-bottomed flask, malononitrile (**S6**, 3.0 g, 45.41 mmol) was dissolved in 45 mL of dry THF and cooled

<sup>3</sup> St. Clair, M. B. G., Amarnath, V., Moody, M. A., Anthony, D. C., Anderson, C. W. & Graham, D. G. Pyrrole oxidation and protein cross-linking as necessary steps in the development of  $\gamma$ -diketone neuropathy. *Chem. Res. Toxicol.* **1**, 179-185 (1988).

to 0 °C. NaH 60% in mineral oil (2.04 g, 55.64 mmol, 1.22 equiv.) was slowly added to the cooled solution and stirred for 30 min at 0 °C before adding chloroacetone (**S2**, 4.75 mL, 59.02 mmol, 1.30 equiv.) dropwise. After stirring at ambient temperature (23 °C) for 72 h, the reaction mixture was cooled to 0 °C with an ice bath and carefully quenched with sat. NH<sub>4</sub>Cl (10 mL), extracted with EtOAc (3 x 15 mL), then washed with water (35 mL) and brine (35 mL). The organic layer was dried over NaSO<sub>4</sub>, filtered, concentrated by rotary evaporation, and purified by flash column chromatography (SiO<sub>2</sub>, 10 → 50% EtOAc/hexanes) to afford keto dinitrile **10f** (0.598 g, 11% unoptimized) as a white solid: TLC (EtOAc:hexanes, 4.5:5.5 v/v): R<sub>f</sub> = 0.41; <sup>1</sup>H NMR (500 MHz; CDCl<sub>3</sub>): δ 4.20 (t, *J* = 6.5 Hz, 1H), 3.23 (d, *J* = 6.5 Hz, 2H), 2.31 (s, 3H); <sup>13</sup>C NMR (125 MHz; CDCl<sub>3</sub>): δ 200.01, 112.26 (2), 43.49, 29.43, 17.49; IR (thin film): 2978, 2949, 2915, 1716 cm<sup>-1</sup>; HRMS (ESI-) *m/z* calcd. for C<sub>6</sub>H<sub>5</sub>N<sub>2</sub>O [M-H]<sup>-</sup>: 121.0407; found, 121.0401.

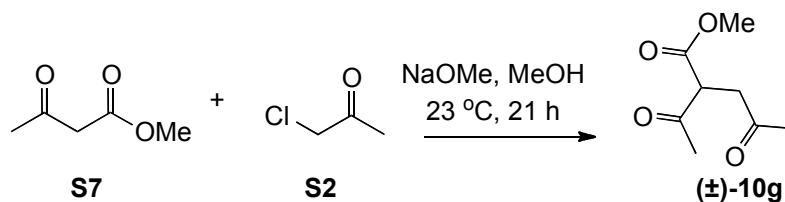

**Methyl 2-acetyl-4-oxopentanoate ((±)-10g).** An oven dried, 500 mL round-bottomed flask was charged with 500 mL of HPLC grade MeOH under a nitrogen atmosphere and then cooled to 0 °C with an ice bath prior to the addition of methylacetoacetone (**S7**, 10.0 mL, 92.66 mmol, 1.0 equiv.) followed by NaOMe (5.51 g, 102.00 mmol, 1.10 equiv.). After 25 min at 0 °C, chloroacetone (**S2**, 10.4 mL, 129.73 mmol, 1.40 equiv.) was added dropwise. After the addition, the ice bath was removed and the reaction was stirred at ambient temperature (23 °C) for 21 h. The reaction was again cooled to 0 °C and 100 mL of sat. NH<sub>4</sub>Cl was added. The reaction mixture was then extracted with EtOAc (4 x 100 mL), then washed with water (2 x 25 mL) and brine (1 x 50 mL). The organic layer was collected and dried over MgSO<sub>4</sub>, filtered, concentrated by rotary evaporation, and purified by flash column chromatography (SiO<sub>2</sub>, 20 → 60% EtOAc/hexanes) to afford diketo ester **(±)-10g** (6.86 g, 43%) as a pale yellow oil: TLC (EtOAc:hexanes, 5:5 v/v): R<sub>f</sub> = 0.50; <sup>1</sup>H NMR (500 MHz;

CDCl<sub>3</sub>):  $\delta$  4.02 (dd,  $J = 8.3, 5.7$  Hz, 1H), 3.73 (s, 3H), 3.15 (dd,  $J = 18.5, 8.3$  Hz, 1H), 2.95 (dd,  $J = 18.5, 5.6$  Hz, 1H), 2.35 (s, 3H), 2.19 (s, 3H); <sup>13</sup>C NMR (125 MHz; CDCl<sub>3</sub>):  $\delta$  205.8, 202.3, 169.5, 53.6, 52.9, 41.8, 30.3, 29.9; IR (thin film): 3002, 2955, 2928, 1759, 1700 cm<sup>-1</sup>; HRMS (ESI+)  $m/z$  calcd. for C<sub>8</sub>H<sub>12</sub>LiO<sub>4</sub> [M+Li]<sup>+</sup>: 179.0896; found 179.0898.

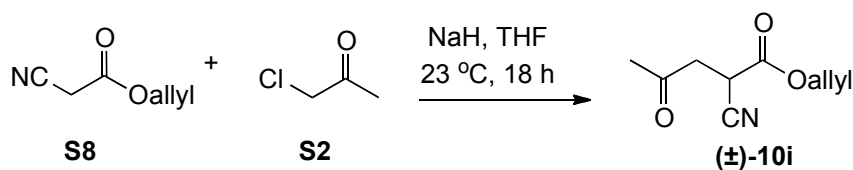

**Allyl 2-cyano-4-oxopentanoate ((±)-10i).** The allyl cyanoacetate (**S8**, 5.0g, 39.96 mmol, 1.00 equiv.) was dissolved in 80 mL of dry THF and cooled to 0 °C. Then NaH 60% in mineral oil (1.79 g, 44.75 mmol, 1.12 equiv.) was slowly added through an addition funnel and stirred for an hour before adding chloroacetone (**S2**, 4.81g, 51.95 mmol, 1.30 equiv.). The reaction was allowed to stir for 18 h at room temperature (23 °C) then cooled to 0 °C and then quenched with sat. NH<sub>4</sub>Cl. EtOAc was added and extracted 3 times. The combined organic layers were washed with brine, dried over Na<sub>2</sub>SO<sub>4</sub> and concentrated. The filtrate was then concentrated by rotary evaporation and purified by flash column chromatography (SiO<sub>2</sub>, 10 → 100% EtOAc/hexanes) to afford allyl cyanoacetate (**(±)-10i**) as a yellow oil (5.56 g, 77%): TLC (EtOAc:hexanes, 3.5:6.5 v/v):  $R_f = 0.48$ ; <sup>1</sup>H NMR (500 MHz; CDCl<sub>3</sub>):  $\delta$  5.95-5.88 (m, 1H), 5.39 (dd,  $J = 17.0, 1$  Hz, 1H), 5.31 (dd,  $J = 10.5, 1.5$  Hz, 1H), 4.70-4.69 (m, 2H), 3.98 (dd,  $J = 7.0, 5.5$  Hz, 1H), 3.21 (dd,  $J = 18.0, 7.5$  Hz, 1H), 3.02 (dd,  $J = 18.0, 5.5$  Hz, 1H), 2.24 (s, 3H); <sup>13</sup>C NMR (125 MHz; CDCl<sub>3</sub>):  $\delta$  202.59, 165.16, 130.77, 119.77, 116.10, 67.68, 42.19, 31.66, 29.64; IR (thin film): 2916, 2256, 1753, 1714 cm<sup>-1</sup>; HRMS (ESI+)  $m/z$  calcd. for C<sub>9</sub>H<sub>12</sub>NO<sub>3</sub> [M+H]<sup>+</sup>: 182.0817; found 182.0820.

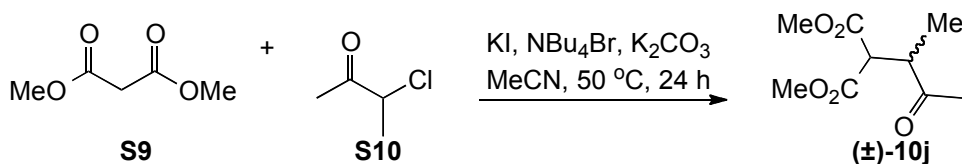

**Dimethyl 2-(3-oxobutan-2-yl)malonate ((±)-10j).** To a 250 mL, round-bottomed flask were added dimethyl malonate (**S9**, 1.81 mL, 15.84 mmol, 1.0 equiv.), 3-chlorobutan-2-one (**S10**, 2.0 mL, 19.80 mmol, 1.25 equiv.), KI (0.132 g, 0.79 mmol, 0.05 equiv.), K<sub>2</sub>CO<sub>3</sub> (2.63 g, 19.00 mmol, 1.20 equiv.), NBu<sub>4</sub>Br (0.102 g, 0.32 mmol, 0.02 equiv.) and MeCN (25 mL). The reaction was heated to 50 °C for 12 h. Stirring was continued for another 12 h at ambient temperature (23 °C). After which time, the reaction was concentrated under reduced pressure by rotary evaporation, diluted with 20 mL of CH<sub>2</sub>Cl<sub>2</sub>, and filtered to remove solids. The filtrate was then concentrated by rotary evaporation and purified by flash column chromatography (SiO<sub>2</sub>, 20 → 60% EtOAc/hexanes) to afford keto diester (±)-**10j** (3.17 g, 99%) as a colorless oil. <sup>13</sup>C NMR (125 MHz; CDCl<sub>3</sub>): δ 209.6, 169.1, 169.0, 54.1, 52.9, 52.8 45.9, 28.8, 14.6. All other characterization data was in accordance with previously reported data for this compound.<sup>4</sup>

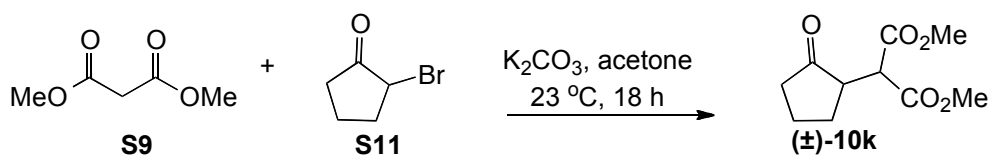

**2-(2-Oxocyclopentyl)malonate ((±)-10k).** To 2-bromocyclopentanone (**S11**, prepared and purified immediately prior to use<sup>5</sup>, 3.42 g, 20.98 mmol, 1.50 equiv.) was added dimethyl malonate (**S9**, 1.60 mL, 13.98 mmol, 1.00 equiv.), K<sub>2</sub>CO<sub>3</sub> (2.50 g, 18.09 mmol, 1.30 equiv.) and acetone (30 mL), which was allowed to react for 18 h at ambient temperature (23 °C). After which time, the reaction was concentrated under reduced pressure by rotary evaporation, diluted with 20 mL of CH<sub>2</sub>Cl<sub>2</sub> and then filtered to remove the solids. The filtrate was then concentrated by rotary evaporation and purified by flash column chromatography (SiO<sub>2</sub>, 20 → 60% EtOAc/hexanes) to afford

<sup>4</sup> L'Esperance, R. P., Ford, T. M. & Jones Jr, M. Reaction of dicarbomethoxy carbene with acetaldehyde and simple ketones. *J. Am. Chem. Soc.* **110**, 209-213 (1998).

<sup>5</sup> Tanemura, K., Suzuki, T., Nishida, Y., Satsumabayashi, K. & Horaguchi, T. A mild and efficient procedure for α-bromination of ketones using N-bromosuccinimide catalysed by ammonium acetate. *Chem. Commun.* **4**, 470-471 (2004).

cyclopentanone diester ( $\pm$ )-**10k** as a colorless oil (720.0 mg, 24%)<sup>6</sup>: TLC (EtOAc:hexanes, 5:5 v/v):  $R_f = 0.53$ ; <sup>1</sup>H NMR (500 MHz; CDCl<sub>3</sub>):  $\delta$  3.83 (d,  $J = 5.7$  Hz, 1H), 3.77 (s, 3H), 3.72 (s, 3H), 2.73-2.69 (m, 1H), 2.36 (dd,  $J = 18.8, 8.4$  Hz, 1H), 2.28-2.20 (m, 2H), 2.12-2.08 (m, 1H), 1.90-1.78 (m, 2H); <sup>13</sup>C NMR (125 MHz; CDCl<sub>3</sub>):  $\delta$  217.1, 169.0, 168.4, 52.7, 52.6, 51.0, 48.6, 37.4, 26.6, 20.6; IR (thin film): 2956, 2880, 1738 cm<sup>-1</sup>; HRMS (ESI+)  $m/z$  calcd. for C<sub>10</sub>H<sub>14</sub>LiO<sub>5</sub> [M+Li]<sup>+</sup>: 221.1001; found 221.1002.

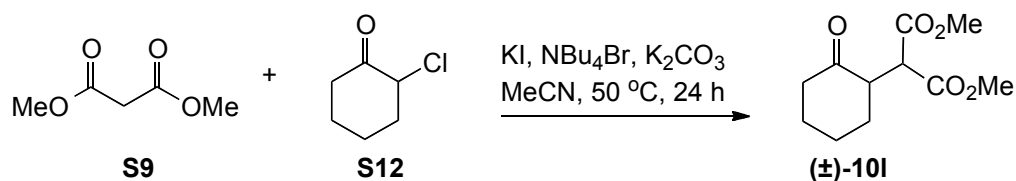

**Dimethyl 2-(2-oxocyclohexyl)malonate (( $\pm$ )-10l).** To a 250 mL round-bottomed flask were added 2-chlorocyclohexanone (**S12**, 5.0 mL, 43.78 mmol, 1.25 equiv.), dimethyl malonate (**S9**, 4.0 mL, 34.94 mmol, 1.0 equiv.), KI (0.30 g, 1.81 mmol), K<sub>2</sub>CO<sub>3</sub> (5.87g, 42.47 mmol, 1.22 equiv.), NBu<sub>4</sub>Br (0.23 g, 0.71 mmol, 0.02 equiv.) and MeCN (50 mL). The reaction mixture was heated to 50 °C for 12 h and then stirred at ambient temperature (23 °C) for an additional 12 h. The reaction was then concentrated under reduced pressure by rotary evaporation, diluted with 50 mL of CH<sub>2</sub>Cl<sub>2</sub> and filtered to remove the solids. The filtrate was then concentrated by rotary evaporation and purified by flash column chromatography (SiO<sub>2</sub>, 20 → 60% EtOAc/hexanes) to afford cyclohexanone diester ( $\pm$ )-**10l** (966.8 mg, 12% unoptimized) as a pale yellow oil: TLC (EtOAc:hexanes, 5:5 v/v):  $R_f = 0.65$ ; <sup>1</sup>H NMR (500 MHz; CDCl<sub>3</sub>):  $\delta$  3.58 (s, 3H), 3.57 (s, 3H), 3.51 (d,  $J = 9.5$  Hz, 1H), 3.07-3.01 (m, 1H), 2.29-2.26 (m, 2H), 2.00-1.96 (m, 1H), 1.90-1.85 (m, 1H), 1.79-1.75 (m, 1H), 1.63-1.45 (m, 2H), 1.44-1.35 (m, 1H); <sup>13</sup>C NMR (125 MHz; CDCl<sub>3</sub>):  $\delta$  209.9, 169.1, 169.0, 52.9, 52.8, 52.1, 50.6, 42.1, 31.4, 27.9, 25.2; IR (thin film): 2955, 2863, 1738, 1706 cm<sup>-1</sup>; HRMS (ESI+)  $m/z$  calcd. for C<sub>11</sub>H<sub>16</sub>LiO<sub>5</sub> [M+Li]<sup>+</sup>: 235.1158; found 235.1154.

<sup>6</sup> Saitoh, F., Mori, M., Okamura, K. & Date, T. Synthesis and X-ray crystal structures of tricyclic ketone containing trans-fused bicyclo[3.3.0]octane unit. *Tetrahedron* **51**, 4439-4446 (1995).

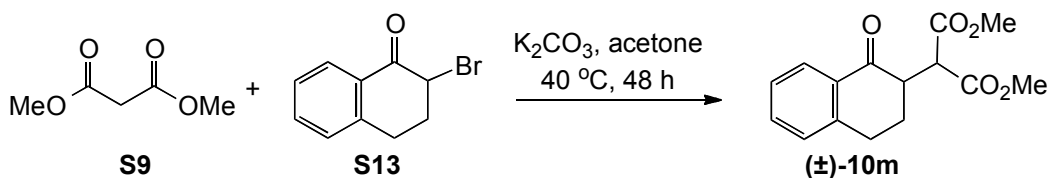

**Dimethyl 2-(1-oxo-1,2,3,4-tetrahydronaphthalen-2-yl)malonate ((±)-10m).** To a 50 mL, round-bottomed flask were added dimethyl malonate (**S9**, 1.45 mL, 12.66 mmol, 1.00 equiv.),  $\text{K}_2\text{CO}_3$  (4.39 g, 31.74 mmol, 2.51 equiv.) and acetone (8 mL). The reaction was heated to 40 °C, then **S13** (4.0 g, 17.77 mmol, 1.40 equiv.) which was freshly prepared and used immediately without purification<sup>7</sup>, was added dropwise over ~4 min and the reaction was maintained at 40 °C for 48 h. After 48 h, the reaction was allowed to cool to ambient temperature (23 °C) and EtOAc (20 mL) and water (20 mL) were added and the reaction was stirred for an additional 10 min. The organic layer was collected, washed with brine 2 x 10mL, dried over  $\text{MgSO}_4$ , filtered, concentrated by rotary evaporation, and purified by flash column chromatography ( $\text{SiO}_2$ , 5 → 30% EtOAc/hexanes) to afford aromatic keto diester **(±)-10m** (3.50 g, 56%) as a yellow/orange solid: TLC (EtOAc:hexanes, 2:8 v/v):  $R_f = 0.48$ ;  $^1\text{H NMR}$  (500 MHz;  $\text{CDCl}_3$ ):  $\delta$  8.00 (d,  $J = 7.9$  Hz, 1H), 7.48 (td,  $J = 7.5, 1.3$  Hz, 1H), 7.31-7.28 (m, 1H), 7.26-7.23 (m, 1H), 4.02 (d,  $J = 7.1$  Hz, 1H), 3.80 (s, 3H), 3.76 (s, 3H), 3.38-3.33 (m, 1H), 3.12 (dt,  $J = 16.4, 8.5$  Hz, 1H), 3.00 (dt,  $J = 16.7, 3.4$  Hz, 1H), 2.20-2.15 (m, 2H);  $^{13}\text{C NMR}$  (125 MHz;  $\text{CDCl}_3$ ):  $\delta$  196.9, 169.3, 169.0, 143.9, 133.9, 132.2, 128.9, 127.8, 127.0, 52.9, 52.8, 52.2, 48.5, 29.6, 26.8; IR (thin film): 2952, 1735, 1676, 1270, 1217, 1155, 764, 749  $\text{cm}^{-1}$ ; HRMS (ESI+)  $m/z$  calcd. for  $\text{C}_{15}\text{H}_{16}\text{LiO}_5$   $[\text{M}+\text{Li}]^+$ : 283.1158; found 283.1172.

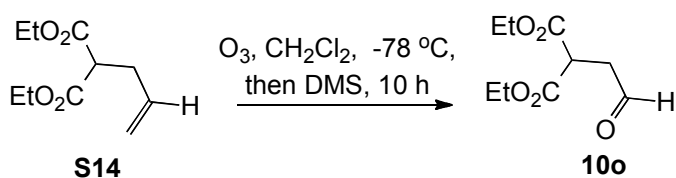

<sup>7</sup> Prokopowicz, M.; Mlynarz, P.; Kafarski, P. Synthesis of phosphonate derivatives of 2,3-dihydroindene. *Tetrahedron Lett.* **50**, 7314-7317 (2009).

**Diethyl 2-(2-oxoethyl)malonate (10o).** Ozone was bubbled through a 100 mL round-bottomed flask with diethyl 2-(2-methylallyl)malonate (**S14**, 1.04 mL, 5.30 mmol, 1.00 equiv.) and CH<sub>2</sub>Cl<sub>2</sub> (29 mL) at -78 °C until it turned a deep blue color. Then oxygen was bubbled through until the color dissipated at which time dimethyl sulfide (1.00 mL, 13.4 mmol, 2.53 equiv.) was added and the reaction was allowed to stir overnight (10 h) while warming to ambient temperature (23 °C). The reaction mixture was concentrated under reduced pressure by rotary evaporation, and purified by flash column chromatography (SiO<sub>2</sub>, 20 → 60% EtOAc/hexanes) to afford aldehyde diester **10o** (0.72 g, 67%) as a colorless oil. All characterization data was in accordance with previously reported data for this compound.<sup>8</sup>

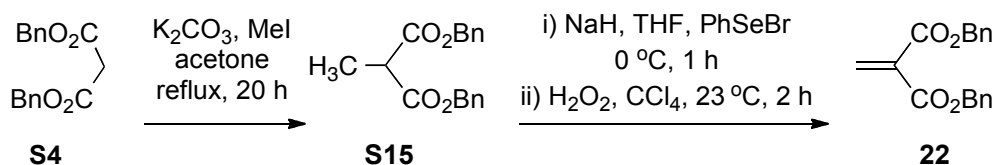

**Dibenzyl 2-methylenemalonate (22).** Dibenzyl 2-methylmalonate **S15** was prepared by modified reported procedure.<sup>9</sup> In an oven-dried, 250-mL round-bottomed flask, dibenzyl malonate (**S4**, 14.2 g, 50.0 mmol, 1.0 equiv) and anhydrous K<sub>2</sub>CO<sub>3</sub> (8.3 g, 60.0 mmol, 1.2 equiv) were dissolved in anhydrous acetone (50 mL) and stirred at ambient temperature (23 °C) for 5 minutes, then iodomethane (3.73 mL, 60.0 mmol, 1.2 equiv) was added dropwise. The reaction mixture was refluxed (60-65 °C) for 20 h. Upon completion (as judged by TLC), the reaction mixture was diluted with Et<sub>2</sub>O (50 mL) and filtered through a pad of celite (Et<sub>2</sub>O wash). The filtrate was concentrated by rotary evaporation, and purified by an automated flash chromatography system

<sup>8</sup> Groth, T., Meldal, M. Synthesis of aldehyde building blocks and protected as acid labile *N*-Boc *N,O*-Acetals: towards combinatorial solid phase synthesis of novel peptide isosteres. *J. Comb. Chem.* **3**, 33-44 (2001).

<sup>9</sup> Kalaitzakis, D., Kambourakis, S., Rozzell, D. J. & Smonou, I. Stereoselective chemoenzymatic synthesis of sitophilate: a natural pheromone. *Tetrahedron: Asymmetry* **18**, 2418-2426 (2007).



(gradient of EtOAc/hexanes) to obtain dibenzyl 2-methylmalonate **S15** (12.6 g, 85% yield) as clear liquid. Spectral data matched that previously reported.<sup>10</sup>

Dibenzyl 2-methylenemalonate **22** was prepared by a modified published procedure.<sup>11</sup> Into an oven-dried, 250-mL round-bottomed flask containing NaH (60% suspension in mineral oil, 1.40 g, 35.0 mmol, 1.5 equiv) in THF (80 mL) at 0 °C was added slowly a solution of dibenzyl 2-methylmalonate **S15** (6.90 g, 23.3 mmol, 1.0 equiv) in THF (10 mL). After gas evolution had ceased, a solution of PhSeBr (6.61 g, 28.0 mmol, 1.2 equiv) in THF (20 mL) was quickly added at 0 °C, resulting in a bright yellow solution. After 30 min, the reaction mixture was diluted with Et<sub>2</sub>O (20 mL) and quenched with saturated NaHCO<sub>3</sub> (50 mL). The organic layer was separated and washed with 10% NaHSO<sub>3</sub> (2 × 50 mL), H<sub>2</sub>O (3 × 50 mL) and dried over anhydrous Na<sub>2</sub>SO<sub>4</sub>. The filtrate was concentrated by rotary evaporation, and purified by an automated flash chromatography system (gradient of EtOAc/hexanes) to afford dibenzyl 2-methyl-2-(phenylselanyl)malonate which was carried on directly.

An oven-dried, 100-mL round-bottomed flask was charged with a solution of dibenzyl 2-methyl-2-(phenylselanyl)malonate in anhydrous CCl<sub>4</sub> (30 mL), followed by an addition of H<sub>2</sub>O<sub>2</sub> (35% in H<sub>2</sub>O, 20.0 mL, 233 mmol, 10.0 equiv). The reaction temperature was maintained at ambient temperature (23 °C) using a water bath. After 2 h, H<sub>2</sub>O (10 mL) was added to dissolve the white precipitate. Then the organic layer was separated, washed with anhydrous CCl<sub>4</sub> (3 × 10 mL), and dried over anhydrous Na<sub>2</sub>SO<sub>4</sub>. The filtrate was concentrated by rotary evaporation to afford pure dibenzyl 2-methylenemalonate **22** (5.67 g, 83% yield over two steps) as light yellow liquid. Pure compound **22** was stored as a frozen solution in anhydrous benzene (1.0 M) at -20 °C to prevent decomposition. TLC (EtOAc:hexanes, 2:8 v/v): R<sub>f</sub> = 0.80; <sup>1</sup>H NMR (300 MHz, CDCl<sub>3</sub>): δ 7.42-7.35 (m, 10H), 6.65 (s, 2H), 5.31 (s, 4H); <sup>13</sup>C NMR (75 MHz, CDCl<sub>3</sub>): δ 163.7 (2), 135.6 (2), 135.4, 134.5, 128.6 (4), 128.4 (2), 128.3 (4), 67.3 (2);

---

<sup>10</sup> Ton, T. M. U., Tejo, C., Tiong, D. L. Y. & Chan, P. W. H. Copper(II) triflate catalyzed amination and aziridination of 2-alkyl substituted 1,3-dicarbonyl compounds. *J. Am. Chem. Soc.* **134**, 7344-7350 (2012).

<sup>11</sup> Trend, R. M., Ramtohl, Y. K. & Stoltz, B. M. Oxidative cyclizations in a nonpolar solvent using molecular oxygen and studies on the stereochemistry of oxypalladation. *J. Am. Chem. Soc.* **127**, 17778-17788 (2005).

IR (thin film): 3066, 3034, 2956, 1735, 1498, 1456, 1385, 1324, 1223, 1123  $\text{cm}^{-1}$ ;  
 HRMS (ESI+)  $m/z$  calcd for  $\text{C}_{18}\text{H}_{16}\text{NaO}_4$   $[\text{M}+\text{Na}]^+$ : 319.0941; found 319.0929.

**Table 1: Optimization of the nucleophile-catalyzed Michael-aldol- $\beta$ -lactonization (NMCAL) process.**

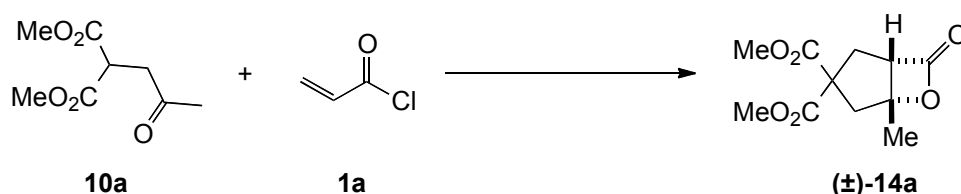

**Entry 1 of Table 1:** Same procedure as described for **Entry 3 of Table 1**, except that no DBU was added. No  $\beta$ -lactone ( $\pm$ )-**14a** was detected by FT-IR,  $^1\text{H}$  NMR, or TLC analysis.

**Entry 2 of Table 1:** Same procedure as described for **Entry 3 of Table 1**, except that no  $\text{LiClO}_4$  was added. No  $\beta$ -lactone ( $\pm$ )-**14a** was detected by FT-IR,  $^1\text{H}$  NMR, or TLC analysis.

**Entry 3 of Table 1:** A mixture of dimethyl 2-(2-oxopropyl) malonate (**10a**,<sup>12</sup> 33 mg, 0.18 mmol, 1.00 equiv.),  $\text{LiClO}_4$  (19 mg, 0.18 mmol, 1.00 equiv.), DBU (27 mg, 0.18 mmol, 1.00 equiv.), DMAP (4.4 mg, 0.036 mmol, 0.20 equiv.), and  $\text{EtN}(\text{Pr})_2$  (63  $\mu\text{L}$ , 0.36 mmol, 2.0 equiv.) in  $\text{CH}_2\text{Cl}_2$  (0.5 mL) was stirred at 23  $^\circ\text{C}$  for 0.5 h. The reaction mixture was then cooled to 0  $^\circ\text{C}$ , and acryloyl chloride (**1a**, 27  $\mu\text{L}$ , 0.36 mmol, 2.0 equiv.) was added. The reaction mixture was warmed to 23  $^\circ\text{C}$  and stirred for 4 h. The reaction was then diluted with  $\text{CH}_2\text{Cl}_2$  (2 mL) and then 30% EtOAc in hexanes (4 mL), and passed through a pad of silica gel to remove solids. The filtrate was concentrated under reduced pressure by rotary evaporation and the residue was purified by flash column chromatography ( $\text{SiO}_2$ , eluting with 20  $\rightarrow$  50% EtOAc:hexanes) to afford  $\beta$ -

<sup>12</sup> Millán, A. et al. Ti/Pd bimetallic systems for the efficient allylation of carbonyl compounds and homocoupling reactions. *Chem. Eur. J.* **17**, 3985-3994 (2011).

lactone ( $\pm$ )-**14a** as a solid (29.6 mg, 68%). Spectral data matched that previously reported.<sup>13</sup>

#### Entry 4 of Table 1

A solution of dimethyl 2-(2-oxopropyl) malonate (**10a**, 33 mg, 0.18 mmol, 1.00 equiv.) in THF (0.5 mL) was cooled to -78 °C and then LDA (180  $\mu$ L, 1.0 M solution in THF, 0.18 mmol, 1.00 equiv.) was then added dropwise. The reaction was stirred for 10 min at -78 °C and then warmed to 0 °C. Subsequently, CH<sub>2</sub>Cl<sub>2</sub> (1 mL), DMAP (23  $\mu$ L, 1.6 M solution in CH<sub>2</sub>Cl<sub>2</sub>, 0.037 mmol, 0.20 equiv.), and EtN(<sup>i</sup>Pr)<sub>2</sub> (60  $\mu$ L, 0.32 mmol, 2.00 equiv.) were added. The reaction was allowed to stir for an additional 10 min at 0 °C before acryloyl chloride (**1a**, 230  $\mu$ L of a 1.6 M solution in CH<sub>2</sub>Cl<sub>2</sub>, 0.36 mmol, 2.00 equiv.) was added. The reaction was warmed to 23 °C and stirred for 4 h. The reaction was diluted with CH<sub>2</sub>Cl<sub>2</sub> (2 mL) and then 30% EtOAc in hexanes (4 mL), and passed through a pad of silica gel. The filtrate was concentrated under reduced pressure by rotary evaporation and the residue was purified by flash column chromatography (SiO<sub>2</sub>, eluting 20  $\rightarrow$  50% EtOAc:hexanes) to afford  $\beta$ -lactone ( $\pm$ )-**14a** (31.8 mg, 73%).

**Entry 5 of Table 1:** Same procedure as described for **Entry 4 of Table 1**, except that *t*-BuLi (72  $\mu$ L, 2.5 M solution in hexane, 0.18 mmol, 1.00 equiv.) was used as base.  $\beta$ -lactone ( $\pm$ )-**14a** (32.7 mg, 75%) was obtained after flash column chromatography.

**Entry 6 of Table 1:** Same procedure as described for **Entry 4 of Table 1**, except that LiHMDS (180  $\mu$ L, 1.0 M solution in THF, 0.18 mmol, 1.00 equiv.) was used as base.  $\beta$ -lactone ( $\pm$ )-**14a** (34.0 mg, 78%) was obtained after flash column chromatography.

---

<sup>13</sup> Leverett, C. A., Purohit, V. C. & Romo, D. Enantioselective, organocatalyzed, intramolecular aldol lactonizations with keto acids leading to bi- and tricyclic  $\beta$ -lactones and topology-morphing transformations. *Angew. Chem. Int. Ed.* **49**, 9479-9483 (2010).

**Entry 7 of Table 1:** Same procedure as described for **Entry 4 of Table 1**, except that NaHMDS (180  $\mu$ L, 1.0 M solution in THF, 0.18 mmol, 1.00 equiv.) was used as base.  $\beta$ -lactone ( $\pm$ )-**14a** (10.0 mg, 23%) was obtained after flash column chromatography.

**Entry 8 of Table 1:** Same procedure as described for **Entry 4 of Table 1**, except that KHMDS (180  $\mu$ L, 1.0 M solution in THF, 0.18 mmol, 1.00 equiv.) was used as base. No  $\beta$ -lactone ( $\pm$ )-**14a** was detected by FT-IR,  $^1$ H NMR, or TLC analysis.

**Entry 9 of Table 1:** Same procedure as described for **Entry 4 of Table 1**, except that isopropyl magnesium chloride (90  $\mu$ L, 2.0 M solution in THF, 0.18 mmol, 1.00 equiv.) was used as base.  $\beta$ -Lactone ( $\pm$ )-**14a** (32.5 mg, 75%) was obtained after flash column chromatography.

**Entry 10 of Table 1:**

A solution of dimethyl 2-(2-oxopropyl) malonate (**10a**, 33 mg, 0.18 mmol, 1.00 equiv.) in THF (0.5 mL) was cooled to -78  $^{\circ}$ C and then LiHMDS (180  $\mu$ L, 1.0 M solution in THF, 0.18 mmol, 1.00 equiv.) was added dropwise. The reaction was stirred for 10 min at -78  $^{\circ}$ C and then warmed up to 0  $^{\circ}$ C. Subsequently,  $\text{CH}_2\text{Cl}_2$  (1 mL), 4-PPY (36  $\mu$ L, 1.0 M solution in  $\text{CH}_2\text{Cl}_2$ , 0.036 mmol, 0.20 equiv.), and  $\text{EtN}(\text{Pr})_2$  (60  $\mu$ L, 0.32 mmol, 2.00 equiv.) were added. The reaction was allowed to stir for an additional 10 min at 0  $^{\circ}$ C before acryloyl chloride (**1a**, 230  $\mu$ L of a 1.6 M solution in  $\text{CH}_2\text{Cl}_2$ , 0.36 mmol, 1.77 equiv.) was added dropwise. The reaction was then warmed to 23  $^{\circ}$ C and stirred for 4 h. The reaction was diluted with  $\text{CH}_2\text{Cl}_2$  (2 mL) and then 30% EtOAc in hexanes (4 mL), and passed through a pad of silica gel. The filtrate was concentrated under reduced pressure by rotary evaporation and the residue was purified by flash column chromatography ( $\text{SiO}_2$ , eluting with 20  $\rightarrow$  50% EtOAc in hexanes) to afford  $\beta$ -lactone ( $\pm$ )-**14a** as a solid (36.6 mg, 84%).

**Entry 11 of Table 1:** Same procedure as described for **Entry 10 of Table 1**, except that 9-azajulolidine (36  $\mu$ L, 1.0 M solution in  $\text{CH}_2\text{Cl}_2$ , 0.036 mmol, 2.00 equiv.) was

added as the nucleophile.  $\beta$ -Lactone ( $\pm$ )-**14a** (33.6 mg, 77%) was obtained after flash column chromatography.

**Entry 12 of Table 1:** Same procedure as described for **Entry 10 of Table 1**, except that no nucleophile was added. No  $\beta$ -lactone ( $\pm$ )-**14a** was detected by FT-IR,  $^1\text{H}$  NMR, or TLC analysis.

**Representative procedure for the racemic the nucleophile-catalyzed Michael-aldol- $\beta$ -lactonization (NMCAL) process as described for  $\beta$ -lactone ( $\pm$ )-**14b**.**

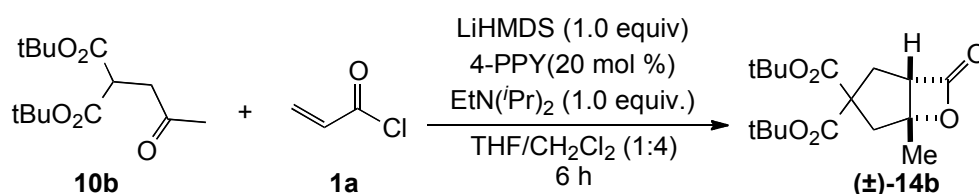

**Di-*tert*-butyl 5-methyl-7-oxo-6-oxabicyclo[3.2.0]heptane-3,3-dicarboxylate (( $\pm$ )-**14b**).** To an oven-dried, 25 mL round-bottomed flask equipped with a magnetic stir bar were added Michael donor **10b** (88 mg, 0.32 mmol, 1.00 equiv.) and THF (1 mL). The mixture was cooled to  $-78\text{ }^\circ\text{C}$  with vigorous stirring and LiHMDS (320  $\mu\text{L}$  of a 1.0 M solution in THF, 0.32 mmol, 1.00 equiv.) was added dropwise via microliter syringe over  $\sim 4$  min. After the addition, the reaction was stirred for 10 min at  $-78\text{ }^\circ\text{C}$  and then warmed to  $0\text{ }^\circ\text{C}$  by switching the dry ice/acetone bath to an ice/water bath. Stirring was continued for an additional 10 min at this temperature, and then CH<sub>2</sub>Cl<sub>2</sub> (4 mL), 4-PPY (80  $\mu\text{L}$  of a 0.82 M solution in CH<sub>2</sub>Cl<sub>2</sub>, 0.064 mmol, 0.20 equiv.) and EtN(*i*Pr)<sub>2</sub> (60  $\mu\text{L}$ , 0.32 mmol, 1.00 equiv.) were added via microliter syringe, sequentially. The reaction was allowed to stir for an additional 10 min at  $0\text{ }^\circ\text{C}$  before acryloyl chloride (**1a**, 261  $\mu\text{L}$  of a 1.612 M solution in CH<sub>2</sub>Cl<sub>2</sub>, 0.42 mmol, 1.30 equiv.) was added via microliter syringe dropwise over  $\sim 2$  min. After the addition, the ice bath was removed and the reaction was stirred for 6 h at ambient temperature ( $23\text{ }^\circ\text{C}$ ). At this time, the reaction was cooled to  $0\text{ }^\circ\text{C}$  and silica gel (2 mL) was added and the reaction was stirred at  $0\text{ }^\circ\text{C}$  for 10 min. The ice/water bath was removed and the reaction stirred at ambient temperature ( $23\text{ }^\circ\text{C}$ ) for 20 min. The mixture was then diluted with hexanes (4.0 mL), filtered through a short silica gel pad ( $\sim 2$  mL of silica gel), and rinsed with EtOAc (3 x

4 mL). The filtrate was then concentrated by rotary evaporation and following  $^1\text{H}$  NMR analysis of the crude reaction mixture, it was purified by flash column chromatography ( $\text{SiO}_2$ , 10  $\rightarrow$  30% EtOAc/hexanes) to afford bicyclic- $\beta$ -lactone ( $\pm$ )-**14b** (105 mg, 73%) as colorless needles: m.p. 73.2 – 75.2  $^\circ\text{C}$  (recrystallized from hexanes: $\text{CH}_2\text{Cl}_2$  (1:1); TLC (EtOAc:hexanes, 3:7 v/v):  $R_f$  = 0.66;  $^1\text{H}$  NMR (500 MHz;  $\text{CDCl}_3$ ):  $\delta$  3.46 (d,  $J$  = 9.0 Hz, 1H), 2.99 (d,  $J$  = 14.1 Hz, 1H), 2.87 (d,  $J$  = 15.4 Hz, 1H), 2.34 (d,  $J$  = 15.4 Hz, 1H), 2.07 (dd,  $J$  = 14.1, 9.1 Hz, 1H), 1.63 (s, 3H), 1.46 (s, 9H), 1.43 (s, 9H);  $^{13}\text{C}$  NMR(125 MHz;  $\text{CDCl}_3$ ):  $\delta$  169.6, 169.2, 168.9, 87.0, 82.7, 82.6, 62.2, 58.8, 43.3, 34.3, 27.8(3), 27.5(3), 21.6; IR (thin film): 2981, 2928, 1833, 1732  $\text{cm}^{-1}$ ; HRMS (ESI+)  $m/z$  calcd. for  $\text{C}_{17}\text{H}_{26}\text{LiO}_6$  [ $\text{M} + \text{Li}$ ] $^+$ : 333.1889; found 333.1902.

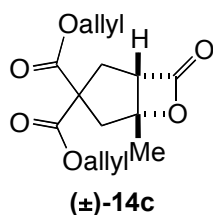

**Diallyl 5-methyl-7-oxo-6-oxabicyclo[3.2.0]heptane-3,3-dicarboxylate ((±)-14c).**

Prepared according to the representative procedure using Michael donor **10c** (76.8 mg, 0.32 mmol, 1.00 equiv.), THF (1 mL), LiHMDS (320  $\mu\text{L}$  of a 1.0 M solution in THF, 0.32 mmol, 1.00 equiv.),  $\text{CH}_2\text{Cl}_2$  (4 mL), 4-PPY (80  $\mu\text{L}$  of a 0.82 M solution in  $\text{CH}_2\text{Cl}_2$ , 0.064 mmol, 0.20 equiv.) and  $\text{EtN}(\text{Pr})_2$  (60  $\mu\text{L}$ , 0.32 mmol, 1.00 equiv.), and acryloyl chloride (**1a**, 261  $\mu\text{L}$  of a 1.612 M solution in  $\text{CH}_2\text{Cl}_2$ , 0.42 mmol, 1.30 equiv.). After addition of acryloyl chloride, the reaction was allowed to react for 6 h at ambient temperature (23  $^\circ\text{C}$ ). Purification by flash column chromatography ( $\text{SiO}_2$ , 10  $\rightarrow$  30% EtOAc/hexanes) afforded bicyclic- $\beta$ -lactone ( $\pm$ )-**14c** (79.1 mg, 84%) as a colorless oil: TLC (EtOAc:hexanes, 3:7 v/v):  $R_f$  = 0.45;  $^1\text{H}$  NMR (500 MHz;  $\text{CDCl}_3$ ):  $\delta$  5.92-5.80 (m, 2H), 5.34-5.22 (m, 4H), 4.69-4.57 (m, 4H), 3.54-3.53 (m, 1H), 3.12 (d,  $J$  = 14.2 Hz, 1H), 3.01 (dd,  $J$  = 15.3, 0.9 Hz, 1H), 2.44 (d,  $J$  = 15.3 Hz, 1H), 2.21 (dd,  $J$  = 14.2, 9.0 Hz, 1H) 1.7 (s, 3H);  $^{13}\text{C}$  NMR (125 MHz;  $\text{CDCl}_3$ ):  $\delta$  170.1, 169.6, 169.0, 131.6, 131.2, 119.24, 119.22, 87.0, 77.2, 67.1, 66.8, 59.0, 43.8, 34.7, 21.6; IR (thin

film): 2362, 2339, 1824, 1729  $\text{cm}^{-1}$ ; HRMS (ESI+)  $m/z$  calcd. for  $\text{C}_{15}\text{H}_{19}\text{O}_6$   $[\text{M} + \text{H}]^+$  295.1182; found 295.1177.

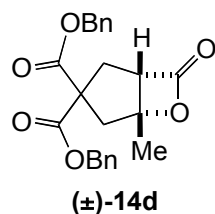

**Dibenzyloxy 5-methyl-7-oxo-6-oxabicyclo[3.2.0]heptane-3,3-dicarboxylate ((±)-14d).**

Prepared according to the representative procedure using Michael donor **10d** (108.9 mg, 0.32 mmol, 1.00 equiv.), THF (1 mL), LiHMDS (320  $\mu\text{L}$  of a 1.0 M solution in THF, 0.32 mmol, 1.00 equiv.),  $\text{CH}_2\text{Cl}_2$  (4 mL), 4-PPY (80  $\mu\text{L}$  of a 0.82 M solution in  $\text{CH}_2\text{Cl}_2$ , 0.064 mmol, 0.20 equiv.) and  $\text{EtN}(\text{Pr})_2$  (60  $\mu\text{L}$ , 0.32 mmol, 1.00 equiv.), and acryloyl chloride (**1a**, 261  $\mu\text{L}$  of a 1.612 M solution in  $\text{CH}_2\text{Cl}_2$ , 0.42 mmol, 1.30 equiv.). After addition of acryloyl chloride, the reaction was allowed to react for 6 h at ambient temperature (23  $^\circ\text{C}$ ). Purification by flash column chromatography ( $\text{SiO}_2$ , 10  $\rightarrow$  50% EtOAc/hexanes) afforded bicyclic- $\beta$ -lactone **(±)-14d** (48 mg, 63%) as a white solid: TLC (EtOAc:hexanes, 3:7 v/v):  $R_f = 0.32$ ;  $^1\text{H}$  NMR (500 MHz;  $\text{CDCl}_3$ ):  $\delta$  7.23 (dt,  $J = 7.3, 3.4$  Hz, 6H), 7.18 (dd,  $J = 6.1, 3.4$  Hz, 2H), 7.13 (dd,  $J = 6.5, 2.7$  Hz, 2H), 5.12 (d,  $J = 12.2$  Hz, 1H), 5.05-4.99 (m, 3H), 3.45 (d,  $J = 8.9$  Hz, 1H), 3.07 (d,  $J = 14.1$  Hz, 1H), 2.96 (d,  $J = 15.3$  Hz, 1H), 2.36 (d,  $J = 15.3$  Hz, 1H), 2.12 (dd,  $J = 14.2, 9.0$  Hz, 1H), 1.62 (s, 3H);  $^{13}\text{C}$  NMR (125 MHz;  $\text{CDCl}_3$ ):  $\delta$  170.1, 169.7, 169.0, 135.2, 135.0, 128.8(2), 128.7(2), 128.65, 128.63(2), 128.5, 128.1(2), 86.9, 68.2, 67.9, 60.9, 59.0, 43.7, 34.6, 29.6 (grease peak), 21.6; IR (thin film): 1829, 1735, 1264  $\text{cm}^{-1}$ ; HRMS (ESI+)  $m/z$  calcd. for  $\text{C}_{23}\text{H}_{22}\text{LiO}_6$   $[\text{M} + \text{Li}]^+$ : 401.1576; found 401.1560.

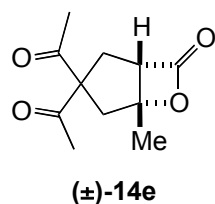

**Methyl-7-oxo-6-oxabicyclo[3.2.0]heptane-3,3-diylldiethanone ((±)-14e).** Prepared according to the representative procedure using Michael donor **10e** (49.8 mg, 0.32 mmol, 1.00 equiv.), THF (1 mL), LiHMDS (320  $\mu$ L of a 1.0 M solution in THF, 0.32 mmol, 1.00 equiv.), CH<sub>2</sub>Cl<sub>2</sub> (4 mL), 4-PPY (80  $\mu$ L of a 0.82 M solution in CH<sub>2</sub>Cl<sub>2</sub>, 0.064 mmol, 0.20 equiv.), EtN(<sup>*i*</sup>Pr)<sub>2</sub> (60  $\mu$ L, 0.32 mmol, 1.00 equiv.), and acryloyl chloride (**1a**, 261  $\mu$ L of a 1.612 M solution in CH<sub>2</sub>Cl<sub>2</sub>, 0.42 mmol, 1.30 equiv.). After the addition of acryloyl chloride, the reaction was allowed to react for 6 h at ambient temperature (23 °C). Purification by flash column chromatography (SiO<sub>2</sub>, 10  $\rightarrow$  50% EtOAc/hexanes) afforded bicyclic- $\beta$ -lactone ( $\pm$ )-**14e** as a white solid (42.8 mg, 64%): m.p. 97.0 – 101.3 °C (recrystallized from hexanes:CH<sub>2</sub>Cl<sub>2</sub> (1:1)); TLC (EtOAc:hexanes, 4.5:5.5 v/v): R<sub>f</sub> = 0.25; <sup>1</sup>H NMR (500 MHz; CDCl<sub>3</sub>):  $\delta$  3.47 (d, *J* = 8.5 Hz, 1H), 3.26 (d, *J* = 14 Hz, 1H), 2.94 (d, *J* = 15.5 Hz, 1H), 2.35 (d, *J* = 15.5 Hz, 1H), 2.22 (s, 3H), 2.10 (s, 3H), 1.99 (dd, *J* = 14, 8.5 Hz, 1H), 1.69 (s, 3H); <sup>13</sup>C NMR (125 MHz; CDCl<sub>3</sub>):  $\delta$  203.37, 202.70, 168.96, 86.60, 76.56, 58.42, 41.35, 32.18, 26.63, 26.47, 21.73; IR (thin film): 2977, 2932, 1820, 1719, 1698 cm<sup>-1</sup>; HRMS (ESI+) *m/z* calcd. for C<sub>11</sub>H<sub>14</sub>LiO<sub>4</sub> [M+Li]<sup>+</sup>: 217.1052; found 217.1058.

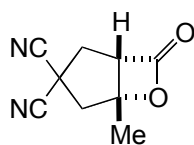

**(±)-14f**

**Methyl-7-oxo-6-oxabicyclo[3.2.0]heptane-3,3-dicarbonitrile ((±)-14f).** To an oven-dried, 25 mL round-bottomed flask equipped with a magnetic stir bar was added Michael donor **10f** (19.5 mg, 0.16 mmol, 1.00 equiv.) and THF (0.5 mL). The mixture was cooled to -78 °C and with vigorous stirring, LiHMDS (160  $\mu$ L of a 1.0 M solution in THF, 0.16 mmol, 1.00 equiv.) was added dropwise via microliter syringe over ~ 4 min. After the addition, the reaction was stirred for 10 min at -78 °C and then warmed to 0 °C by switching the dry ice/acetone bath to an ice/water bath. Stirring was continued for an additional 10 min at this temperature, and then CH<sub>2</sub>Cl<sub>2</sub> (2 mL), 4-PPY (40  $\mu$ L of a 0.82 M solution in CH<sub>2</sub>Cl<sub>2</sub>, 0.032 mmol, 0.20 equiv.) and EtN(<sup>*i*</sup>Pr)<sub>2</sub> (60  $\mu$ L, 0.32 mmol, 2.00 equiv.) were added via microliter syringe sequentially. The reaction



was allowed to stir for an additional 10 min at 0 °C before the acryloyl chloride (**1a**, 261  $\mu\text{L}$  of a 1.612 M solution in  $\text{CH}_2\text{Cl}_2$ , 0.32 mmol, 2.00 equiv.) was added via microliter syringe dropwise over  $\sim 2$  min. After the addition, the reaction was stirred for 3 h at 0 °C. At this time, silica gel ( $\sim 2$  g) was added and the reaction was stirred at 0 °C for 10 min. The ice/water bath was removed and the reaction stirred at ambient temperature (23 °C) for 20 min. The mixture was then diluted with hexanes (1.0 mL), filtered through a short silica gel pad ( $\sim 2$  g of silica gel), and rinsed with EtOAc (3 x 3 mL). The filtrate was then concentrated by rotary evaporation and following  $^1\text{H}$  NMR analysis of the crude reaction mixture, it was purified by flash column chromatography ( $\text{SiO}_2$ , 10  $\rightarrow$  50% EtOAc/hexanes) to afford bicyclic- $\beta$ -lactone ( $\pm$ )-**14f** (16.9 mg, 60%) as a white solid: m.p. 120.2 – 123.0 °C (recrystallized from hexanes: $\text{CH}_2\text{Cl}_2$  (1:1)); TLC (EtOAc:hexanes, 4.5:5.5 v/v):  $R_f = 0.24$ ;  $^1\text{H}$  NMR (500 MHz;  $\text{CDCl}_3$ ):  $\delta$  3.84 (d,  $J = 8.5$  Hz, 1H), 3.19 (d,  $J = 15$  Hz, 1H), 3.10 (d,  $J = 14.5$  Hz, 1H), 2.62 (dd,  $J = 14.5, 8.5$  Hz, 1H), 2.44 (d,  $J = 15$  Hz, 1H), 1.82 (s, 3H);  $^{13}\text{C}$  NMR (125 MHz;  $\text{CDCl}_3$ ):  $\delta$  166.2, 114.4, 114.3, 85.5, 59.1, 46.6, 38.4, 33.5, 21.4; IR (thin film): 2958, 2255, 1822  $\text{cm}^{-1}$ ; HRMS (ESI-)  $m/z$  calcd. for  $\text{C}_9\text{H}_7\text{N}_2\text{O}_2$   $[\text{M}-\text{H}]^-$ : 175.0508; found 175.0501.

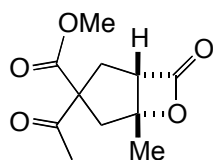

( $\pm$ )-**14g**

**Methyl 3-acetyl-5-methyl-7-oxo-6-oxabicyclo[3.2.0]heptane-3-carboxylate** ( $\pm$ )-**14g**). Prepared according to the representative procedure using Michael donor **10g** (55.1 mg, 0.32 mmol, 1.00 equiv.), THF (1 mL), LiHMDS (320  $\mu\text{L}$  of a 1.0 M solution in THF, 0.32 mmol, 1.00 equiv.),  $\text{CH}_2\text{Cl}_2$  (4 mL), 4-PPY (80  $\mu\text{L}$  of a 0.82 M solution in  $\text{CH}_2\text{Cl}_2$ , 0.064 mmol, 0.20 equiv.),  $\text{EtN}(\text{tPr})_2$  (60  $\mu\text{L}$ , 0.32 mmol, 1.00 equiv.), and acryloyl chloride (**1a**, 261  $\mu\text{L}$  of a 1.612 M solution in  $\text{CH}_2\text{Cl}_2$ , 0.42 mmol, 1.30 equiv.). After addition of acryloyl chloride, the reaction was allowed to react for 8 h at ambient temperature (23 °C) as opposed to the standard 6 h. Purification by flash column chromatography ( $\text{SiO}_2$ , 25  $\rightarrow$  55% EtOAc/hexanes) afforded a mixture of

diastereomers (1:1) of bicyclic- $\beta$ -lactone ( $\pm$ )-**14g** (52.9 mg, 73%) as a pale yellow oil: TLC (EtOAc:hexanes, 5:5 v/v):  $R_f$  = 0.31; (NMR data is provided for the 1:1 mixture of diastereomers)  $^1\text{H}$  NMR (500 MHz;  $\text{CDCl}_3$ ):  $\delta$  3.76 (s, 3H), 3.72 (s, 3H), 3.51 (d,  $J$  = 8.5 Hz, 1H), 3.48 (d,  $J$  = 8.5 Hz, 1H), 3.14 (d,  $J$  = 14.2 Hz, 1H), 3.04 (d,  $J$  = 14.0 Hz, 1H), 2.93 (d,  $J$  = 15.6 Hz, 1H), 2.87 (d,  $J$  = 15.3 Hz, 1H), 2.44 (d,  $J$  = 15.6 Hz, 1H), 2.3 (m, 1H), 2.25 (s, 3H), 2.18 (s, 3H), 2.17 - 2.11 (m, 1H), 2.04 (dd,  $J$  = 14.0, 8.9 Hz, 1H), 1.68 (s, 3H), 1.67 (s, 3H);  $^{13}\text{C}$  NMR (125 MHz;  $\text{CDCl}_3$ ):  $\delta$  201.6, 201.5, 171.6, 171.2, 169.2, 168.9, 87.0, 86.7, 67.8, 67.1, 59.0, 58.8, 53.5 (2), 43.0, 42.5, 33.6, 33.2, 26.9, 26.5, 21.8, 21.7; IR (thin film): 1827, 1711  $\text{cm}^{-1}$ ; HRMS (ESI+)  $m/z$  calcd. for  $\text{C}_{11}\text{H}_{15}\text{O}_5$   $[\text{M}+\text{H}]^+$ : 227.0919; found 227.0923.

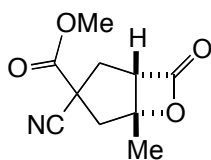

( $\pm$ )-**14h**

**Methyl 3-cyano-5-methyl-7-oxo-6-oxabicyclo[3.2.0]heptane-3-carboxylate (( $\pm$ )-**14h**).**

Prepared according to the representative procedure using known Michael donor **10h**<sup>14</sup> (50.0 mg, 0.32 mmol, 1.00 equiv.), THF (1 mL), LiHMDS (320  $\mu\text{L}$  of a 1.0 M solution in THF, 0.32 mmol, 1.00 equiv.),  $\text{CH}_2\text{Cl}_2$  (4 mL), 4-PPY (80  $\mu\text{L}$  of a 0.82 M solution in  $\text{CH}_2\text{Cl}_2$ , 0.064 mmol, 0.20 equiv.),  $\text{EtN}(\text{tPr})_2$  (92  $\mu\text{L}$ , 0.48 mmol, 1.50 equiv.), acryloyl chloride (**1a**, 261  $\mu\text{L}$  of a 1.612 M solution in  $\text{CH}_2\text{Cl}_2$ , 0.42 mmol, 1.30 equiv.). After the addition of acryloyl chloride, the reaction was allowed to react at ambient temperature (23  $^\circ\text{C}$ ) for 6 h. Purification by flash column chromatography ( $\text{SiO}_2$ , 10  $\rightarrow$  40% EtOAc/hexanes) afforded a mixture of diastereomers (1.7:1) of bicyclic- $\beta$ -lactone ( $\pm$ )-**14h** (43.5 mg, 65%) as a yellow oil: TLC (EtOAc:hexanes, 3.5:6.5 v/v):  $R_f$  = 0.38 and 0.12; (NMR data is provided for the 1.7:1 mixture of diastereomers)  $^1\text{H}$  NMR (500 MHz;  $\text{CDCl}_3$ ):  $\delta$  3.89 (s, 3H), 3.86 (s, 3H), 3.74 (d,  $J$  =

<sup>14</sup> Kim, C. H., Jang, K. D., Choi, S. Y., Chung, Y. K. & Lee, E. A carbonyl ylide cycloaddition approach to platensimycin. *Angew. Chem. Int. Ed.* **47**, 4009-4011 (2008).

5 Hz, 1H), 3.65 (d,  $J = 5.0$  Hz, 1H), 3.25-3.21 (m, 2H), 2.91 (d,  $J = 15.1$  Hz, 1H), 2.82 (d,  $J = 15.1$  Hz, 1H), 2.53 (dd,  $J = 14.4, 8.5$  Hz, 1H), 2.45-2.35 (m, 4H), 1.77 (s, 3H), 1.73 (s, 3H);  $^{13}\text{C}$  NMR (125 MHz;  $\text{CDCl}_3$ ):  $\delta$  168.1, 167.7, 167.6, 166.9, 118.3, 118.2, 86.3, 86.0, 59.4, 59.2, 54.7, 54.6, 47.2, 46.9, 46.1, 45.4, 37.0, 35.5, 21.6 (2).; IR (thin film): 2357, 1824, 1747  $\text{cm}^{-1}$ ; HRMS (ESI+)  $m/z$  calcd. for  $\text{C}_{10}\text{H}_{11}\text{LiNO}_4$   $[\text{M}+\text{Li}]^+$ : 216.0848; found 216.0839.

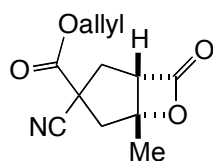

(±)-**14i**

**Allyl 3-cyano-5-methyl-7-oxo-6-oxabicyclo[3.2.0]heptane-3-carboxylate ((±)-14i).**

Prepared according to the representative procedure using known Michael donor **10i**<sup>15</sup> (57.98 mg, 0.32 mmol, 1.00 equiv.), THF (1 mL), LiHMDS (320  $\mu\text{L}$  of a 1.0 M solution in THF, 0.32 mmol, 1.00 equiv.),  $\text{CH}_2\text{Cl}_2$  (4 mL), 4-PPY (80  $\mu\text{L}$  of a 0.82 M solution in  $\text{CH}_2\text{Cl}_2$ , 0.064 mmol, 0.20 equiv.),  $\text{EtN}(\text{tPr})_2$  (60  $\mu\text{L}$ , 0.32 mmol, 1.00 equiv.), acryloyl chloride (**1a**, 261  $\mu\text{L}$  of a 1.612 M solution in  $\text{CH}_2\text{Cl}_2$ , 0.42 mmol, 1.30 equiv.). After addition of acryloyl chloride, the reaction was allowed to react at ambient temperature (23  $^\circ\text{C}$ ) for 24 h. Purification by flash column chromatography ( $\text{SiO}_2$ , 10  $\rightarrow$  50% EtOAc/hexanes) afforded a mixture of diastereomers (1.16:1) of bicyclic- $\beta$ -lactone ((±)-**14i**) (40.7 mg, 60%) as a yellow oil: TLC (EtOAc:hexanes, 3.5:6.5  $v/v$ ):  $R_f = 0.39$ ; (NMR data is provided for the 1.16:1 mixture of diastereomers)  $^1\text{H}$  NMR (500 MHz;  $\text{CDCl}_3$ ):  $\delta$  5.97-5.89 (m, 2H), 5.44-5.38 (m, 2H), 5.35-5.32 (m, 2H), 4.75-4.71 (m, 4H), 3.74 (d,  $J = 8.0$  Hz, 1H), 3.63 (dd,  $J = 9.0, 1$  Hz, 1H), 3.25 (dd,  $J = 14.5, 7.5$  Hz, 2H), 2.92 (dd,  $J = 15.0, 1.0$  Hz, 1H), 2.82 (d,  $J = 14.5$  Hz, 1H), 2.53 (dd,  $J = 14.5, 8.5$  Hz, 1H), 2.45-2.40 (m, 2H), 2.38 (d,  $J = 2.5$  Hz, 1H), 1.77 (s, 3H), 1.74 (s, 3H);  $^{13}\text{C}$  NMR (125 MHz;  $\text{CDCl}_3$ ):  $\delta$  167.75, 167.53, 167.28, 166.08, 130.58, 130.47, 120.50, 120.39, 118.23, 118.20, 86.34, 86.04, 68.48, 68.23, 59.35, 59.19, 47.37, 47.12, 46.05, 45.33, 36.92, 35.52, 21.57 (2); IR (thin film): 2937, 2246, 1822,

1745  $\text{cm}^{-1}$ ; HRMS (ESI+)  $m/z$  calcd for  $\text{C}_{12}\text{H}_{14}\text{NO}_4$   $[\text{M}+\text{H}]^+$ : 236.0923; found 236.1220

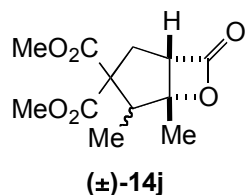

**Dimethyl 4,5-dimethyl-7-oxo-6-oxabicyclo[3.2.0]heptane-3,3-dicarboxylate ((±)-14j).** Prepared according to the representative procedure using Michael donor **10j** (65.4 mg, 0.32 mmol, 1.00 equiv.), THF (1 mL), LiHMDS (320  $\mu\text{L}$  of a 1.0 M solution in THF, 0.32 mmol, 1.00 equiv.),  $\text{CH}_2\text{Cl}_2$  (4 mL), 4-PPY (80  $\mu\text{L}$  of a 0.82 M solution in  $\text{CH}_2\text{Cl}_2$ , 0.064 mmol, 0.20 equiv.),  $\text{EtN}(\text{Pr})_2$  (60  $\mu\text{L}$ , 0.32 mmol, 1.00 equiv.), and acryloyl chloride (**1a**, 261  $\mu\text{L}$  of a 1.612 M solution in  $\text{CH}_2\text{Cl}_2$ , 0.42 mmol, 1.30 equiv.). After the addition of acryloyl chloride, the reaction was allowed to react for 9 h at ambient temperature (23  $^\circ\text{C}$ ) as opposed to the standard 6 h. Purification by flash column chromatography ( $\text{SiO}_2$ , 15  $\rightarrow$  50% EtOAc/hexanes) afforded a mixture of diastereomers (2:1) of bicyclic- $\beta$ -lactone ((±)-**14j**) (69.3 mg, 84%) as a pale yellow oil: TLC (EtOAc:hexanes, 4:6  $v/v$ ):  $R_f$  = 0.33 and 0.42; (NMR data is provided for the 2:1 mixture of diastereomers)  $^1\text{H}$  NMR (500 MHz;  $\text{CDCl}_3$ ):  $\delta$  3.72 (brs, 6H), 3.71 (s, 6H), 3.52-3.48 (m, 2H), 3.36 (d,  $J$  = 7.6 Hz, 1H), 2.95 (d,  $J$  = 14.3 Hz, 1H), 2.81 (d,  $J$  = 14.6 Hz, 1H), 2.70-2.61 (m, 2H), 2.00 (dd,  $J$  = 14.3, 9.1 Hz, 1H), 1.60 (s, 3H), 1.59 (s, 3H), 1.19 (d,  $J$  = 7.1 Hz, 3H), 0.90 (d,  $J$  = 7.6 Hz, 3H);  $^{13}\text{C}$  NMR (125 MHz;  $\text{CDCl}_3$ ):  $\delta$  171.1, 170.0, 169.9, 169.8, 169.31, 169.27, 89.12, 87.9, 65.5, 63.1, 58.4, 57.9, 53.4, 53.23, 53.20, 52.6, 47.7, 45.8, 33.6, 31.0, 20.5, 19.6, 13.0, 9.8; IR (thin film): 2961, 1824, 1735  $\text{cm}^{-1}$ ; HRMS (ESI+)  $m/z$  calcd. for  $\text{C}_{12}\text{H}_{16}\text{OLiO}_6$   $[\text{M}+\text{Li}]^+$ : 263.1107; found 263.1115.

**Representative procedure for the racemic nucleophile-catalyzed Michael-aldol- $\beta$ -lactonization (NMCAL) process when varying the Michael acceptors as described for  $\beta$ -lactone ((±)-14k.**

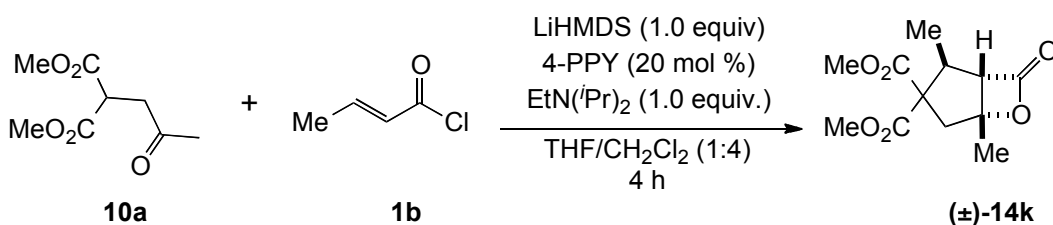

**Dimethyl 2,5-dimethyl-7-oxo-6-oxabicyclo[3.2.0]heptane-3,3-dicarboxylate ((±)-14k).** To an oven-dried, 25 mL round-bottomed flask equipped with a magnetic stir bar was added dimethyl 2-(2-oxopropyl) malonate (**10a**, 61.0 mg, 0.32 mmol, 1.00 equiv.) along with THF (1 mL) and the mixture was cooled to  $-78\text{ }^\circ\text{C}$ . With vigorous stirring, LiHMDS (320  $\mu\text{L}$  of a 1.0 M solution in THF, 0.32 mmol, 1.00 equiv.) was added dropwise via microliter syringe. After complete addition, the reaction was stirred for 10 min at  $-78\text{ }^\circ\text{C}$  and then warmed to  $0\text{ }^\circ\text{C}$  by switching the dry ice/acetone bath to an ice/water bath. Stirring was continued for an additional 10 min at this temperature, and then  $\text{CH}_2\text{Cl}_2$  (4 mL), 4-PPY (80  $\mu\text{L}$  of a 0.82 M solution in  $\text{CH}_2\text{Cl}_2$ , 0.064 mmol, 0.20 equiv.) and  $\text{EtN(iPr)}_2$  (60  $\mu\text{L}$ , 0.32 mmol, 1.00 equiv.) were added via microliter syringe, sequentially. The reaction was allowed to stir for an additional 10 min at  $0\text{ }^\circ\text{C}$  before (*E*)-but-2-enoyl chloride (**1b**, 260  $\mu\text{L}$  of a 1.6 M solution in  $\text{CH}_2\text{Cl}_2$ , 0.42 mmol, 1.30 equiv.) was added via microliter syringe dropwise over  $\sim 2$  min. After complete addition, the ice bath was removed and the reaction was stirred for 4 h at ambient temperature ( $23\text{ }^\circ\text{C}$ ). The reaction was then cooled to  $0\text{ }^\circ\text{C}$  and silica gel (2 g) was added and stirred at  $0\text{ }^\circ\text{C}$  for 10 min. Then the ice/water bath was removed and the reaction stirred at ambient temperature ( $23\text{ }^\circ\text{C}$ ) for 20 min. The mixture was then diluted with hexanes (4.0 mL), filtered through a short silica gel pad ( $\sim 2$  g of silica gel), and rinsed with EtOAc (3 x 4 mL). The filtrate was then concentrated by rotary evaporation, analyzed by  $^1\text{H}$  NMR. Purification by flash column chromatography ( $\text{SiO}_2$ , 10  $\rightarrow$  40% EtOAc/hexanes) afforded a single diastereomer of bicyclic- $\beta$ -lactone (**(±)-14k** (77.1 mg, 94%) as a white solid: TLC (EtOAc:hexanes, 3:7 v/v):  $R_f = 0.25$ ;  $^1\text{H}$  NMR (500 MHz;  $\text{CDCl}_3$ ):  $\delta$  3.71 (s, 3H), 3.70 (s, 3H), 3.42 (q,  $J = 7.5$  Hz, 1H), 3.17 (s, 1H), 2.82 (d,  $J = 16.5$  Hz, 1H), 2.63 (d,  $J = 16.5$  Hz, 1H), 1.66 (s, 3H), 0.86 (d,  $J = 7.5$  Hz, 3H);  $^{13}\text{C}$  NMR (125 MHz;  $\text{CDCl}_3$ ):  $\delta$  170.6, 168.8, 168.3, 86.0, 65.9, 64.5, 53.2,

53.0, 40.9, 39.6, 22.2, 17.0; IR (thin film): 2996, 2927, 1835, 1735, 1730  $\text{cm}^{-1}$ ; HRMS (ESI+)  $m/z$  calcd. for  $\text{C}_{12}\text{H}_{17}\text{O}_6$   $[\text{M}+\text{H}]^+$ : 257.1025; found 257.1038.

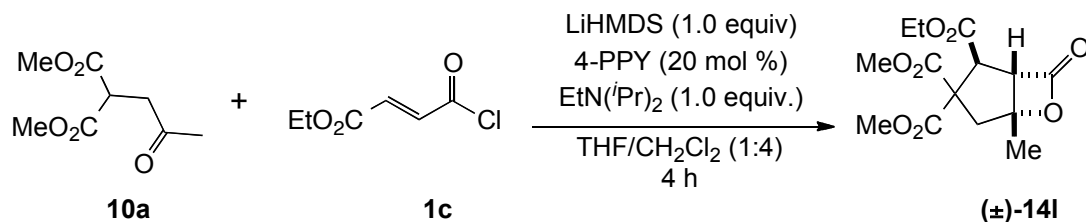

**2-Ethyl 3,3-dimethyl 5-methyl-7-oxo-6-oxabicyclo[3.2.0] heptane-2,3,3-tricarboxylate ((±)-14l).** Prepared according to the representative procedure for (±)-14k, except that ethyl fumaroyl chloride (**1c**, 68.2  $\mu\text{L}$ , 0.42 mmol, 1.30 equiv.) was added as the Michael acceptor to afford a single diastereomer of bicyclic- $\beta$ -lactone (±)-14l (91.5 mg, 91%) as a white solid: TLC (EtOAc:hexanes, 3:7  $v/v$ ):  $R_f = 0.35$ ;  $^1\text{H}$  NMR (500 MHz,  $\text{CDCl}_3$ ):  $\delta$  4.23 (s, 1H), 4.18-4.06 (m, 2H), 3.78 (s, 3H), 3.73 (s, 3H), 3.71 (s, 1H), 2.97 (d,  $J = 15.5$  Hz, 1H), 2.78 (d,  $J = 15.5$  Hz, 1H), 1.74 (s, 3H), 1.25 (t,  $J = 7$  Hz, 3H);  $^{13}\text{C}$  NMR (125 MHz,  $\text{CDCl}_3$ ):  $\delta$  170.8, 169.4, 168.4, 167.1, 87.17, 64.1, 62.2, 62.1, 53.8, 53.5, 50.7, 42.6, 21.6, 14.2; IR (thin film) 2985, 2958, 1832, 1740  $\text{cm}^{-1}$ ; HRMS (ESI+)  $m/z$  calcd. for  $\text{C}_{14}\text{H}_{19}\text{O}_8$   $[\text{M}+\text{H}]^+$  315.1080; found 315.1097.

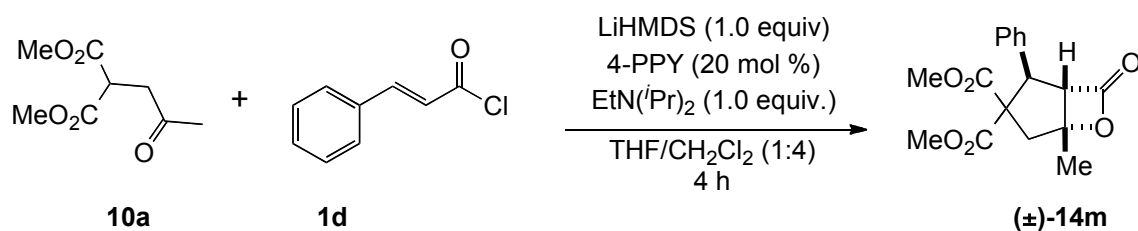

**Dimethyl 5-methyl-7-oxo-2-phenyl-6-oxabicyclo[3.2.0]heptane-3,3-dicarboxylate ((±)-14m).** Prepared according to the representative procedure for (±)-14k, except that cinnamoyl chloride (**1d**, 70 mg, 0.42 mmol, 1.30 equiv.) was added as the Michael acceptor to afford a single diastereomer of bicyclic- $\beta$ -lactone (±)-14m (91.6 mg, 90%) as a white solid: TLC (EtOAc:hexanes, 2:8  $v/v$ ):  $R_f = 0.15$ ;  $^1\text{H}$  NMR (500 MHz;  $\text{CDCl}_3$ ):  $\delta$  7.27 (m, 3H), 6.95 (d,  $J = 7.0$  Hz, 2H), 4.62 (s, 1H), 3.78 (s, 3H), 3.68 (s, 1H), 3.30 (s, 3H), 2.90 (s, 2H), 1.89 (s, 3H);  $^{13}\text{C}$  NMR (125 MHz;  $\text{CDCl}_3$ ):  $\delta$  170.6,

167.9, 167.6, 138.2, 128.7 (2), 128.0, 127.9(2), 87.3, 66.8, 65.4, 53.5, 52.63, 51.0, 41.9, 21.4; IR (thin film): 2967, 2935, 1829, 1732, 1728  $\text{cm}^{-1}$ ; HRMS (ESI+)  $m/z$  calcd. for  $\text{C}_{17}\text{H}_{19}\text{O}_6$   $[\text{M}+\text{H}]^+$ : 319.1182; found 319.1149.

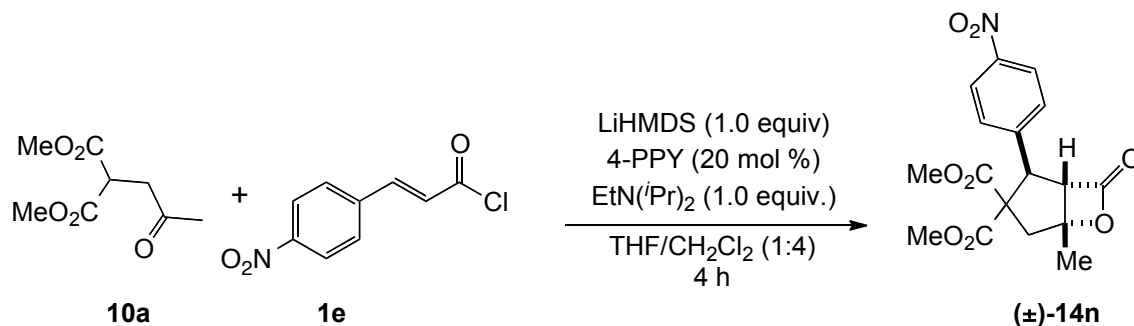

**Dimethyl 5-methyl-2-(4-nitrophenyl)-7-oxo-6-oxabicyclo [3.2.0]heptane-3,3-dicarboxylate ((±)-14n).** Prepared according to the representative procedure for (±)-14k, except that *trans*-4-nitrocinnamoyl chloride (**1e**, 89 mg, 0.42 mmol, 1.30 equiv.) was added as the Michael acceptor to afford a single diastereomer of bicyclic-β-lactone (±)-14n (96.5 mg, 83%) as a white solid: TLC (EtOAc:hexanes, 2:8 *v/v*):  $R_f = 0.25$ ;  $^1\text{H}$  NMR (500 MHz;  $\text{CDCl}_3$ ):  $\delta$  8.17 (d,  $J = 9.0$  Hz, 2H), 7.15 (d,  $J = 9.0$  Hz, 2H), 4.77 (s, 1H), 3.82 (s, 3H), 3.69 (s, 1H), 3.36 (s, 3H), 2.98 (d,  $J = 16$  Hz, 1H), 2.88 (d,  $J = 16$  Hz, 1H), 1.94 (s, 3H);  $^{13}\text{C}$  NMR (125 MHz;  $\text{CDCl}_3$ ):  $\delta$  170.1, 167.3, 166.9, 147.6, 145.7, 129.0(2), 124.0(2), 87.2, 66.8, 65.2, 53.9, 53.0, 50.7, 42.2, 21.6; IR (thin film): 2986, 2945, 1831, 1736, 1729  $\text{cm}^{-1}$ ; HRMS (ESI+)  $m/z$  calcd. for  $\text{C}_{17}\text{H}_{18}\text{NO}_8$   $[\text{M} + \text{H}]^+$ : 364.1032; found 364.1059.

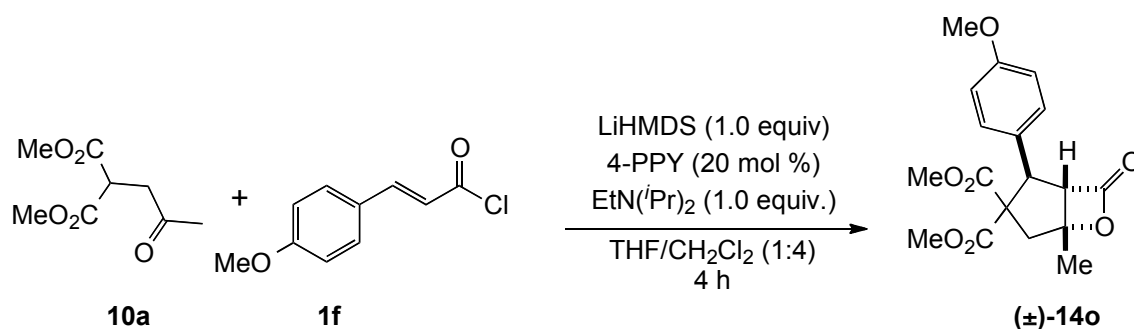

**Dimethyl 2-(4-methoxyphenyl)-5-methyl-7-oxo-6-oxabicyclo [3.2.0]heptane-3,3-dicarboxylate ((±)-14o).** Prepared according to the representative procedure for (±)-14k, except that (*E*)-3-(4-methoxyphenyl)acryloyl chloride (**1f**, 82 mg, 0.42 mmol,

1.30 equiv.) was added as the Michael acceptor to afford a single diastereomer of bicyclic- $\beta$ -lactone ( $\pm$ )-**14o** (97.0 mg, 87%) as a white solid: TLC (EtOAc:hexanes, 2:8 *v/v*):  $R_f$  = 0.20;  $^1\text{H}$  NMR (500 MHz;  $\text{CDCl}_3$ ):  $\delta$  6.86 (d,  $J$  = 8.5 Hz, 2H), 6.78 (d,  $J$  = 8.5 Hz, 2H), 4.57 (s, 1H), 3.77 (s, 3H), 3.75 (s, 3H), 3.63 (s, 1H), 3.33 (s, 3H), 2.87 (s, 2H), 1.88 (s, 3H);  $^{13}\text{C}$  NMR (125 MHz;  $\text{CDCl}_3$ ):  $\delta$  170.7, 168.0, 167.7, 159.1, 130.2, 129.0(2), 114.0(2), 87.2, 66.8, 65.6, 55.2, 53.4, 52.6, 50.3, 41.9, 21.5; IR (thin film): 2993, 2946, 1828, 1728, 1725  $\text{cm}^{-1}$ ; HRMS (ESI+)  $m/z$  calcd. for  $\text{C}_{18}\text{H}_{21}\text{O}_7$  [ $\text{M} + \text{H}$ ] $^+$ : 349.1287; found 349.1299.

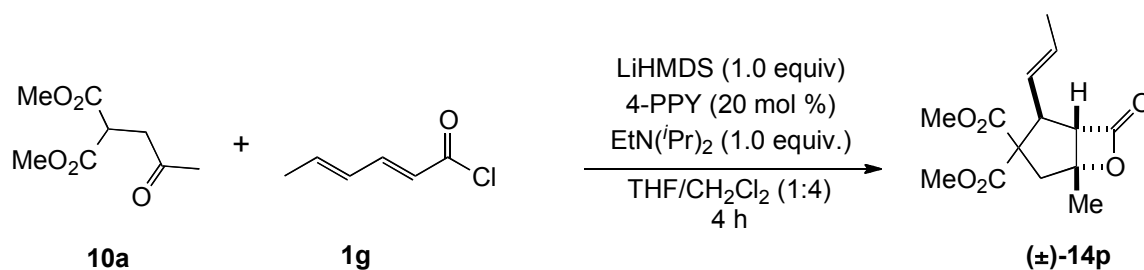

**Dimethyl 5-methyl-7-oxo-2-((E)-prop-1-en-1-yl)-6-oxabicyclo [3.2.0]heptane-3,3-dicarboxylate (( $\pm$ )-**14p**).** Prepared according to the representative procedure for ( $\pm$ )-**14k**, except that sorbic chloride (**1g**, 51.4  $\mu\text{L}$ , 0.42 mmol, 1.3 equiv) was added as the Michael acceptor to afford a single diastereomer of bicyclic- $\beta$ -lactone ( $\pm$ )-**14p** (58.0 mg, 64%) as a white solid: TLC (EtOAc:hexanes, 3:7 *v/v*):  $R_f$  = 0.50;  $^1\text{H}$  NMR (500 MHz;  $\text{CDCl}_3$ ):  $\delta$  5.59 (m, 1H), 5.09 (m, 1H), 3.90 (d,  $J$  = 10 Hz, 1H), 3.75 (s, 3H), 3.63 (s, 3H), 3.33 (s, 1H), 2.82 (d,  $J$  = 16 Hz, 1H), 2.65 (d,  $J$  = 16 Hz, 1H), 1.71 (s, 3H), 1.64 (dd,  $J$  = 6.5, 1.5 Hz, 3H);  $^{13}\text{C}$  NMR (125 MHz;  $\text{CDCl}_3$ ): 170.5, 168.4, 168.0, 130.0, 126.4, 86.4, 65.3, 64.5, 53.3, 53.0, 48.6, 41.5, 22.0, 18.0; IR (thin film): 2977, 2963, 1829, 1732, 1729  $\text{cm}^{-1}$ ; HRMS (ESI+)  $m/z$  calcd. for  $\text{C}_{14}\text{H}_{19}\text{O}_6$  [ $\text{M} + \text{H}$ ] $^+$ : 283.1182; found 283.1203.

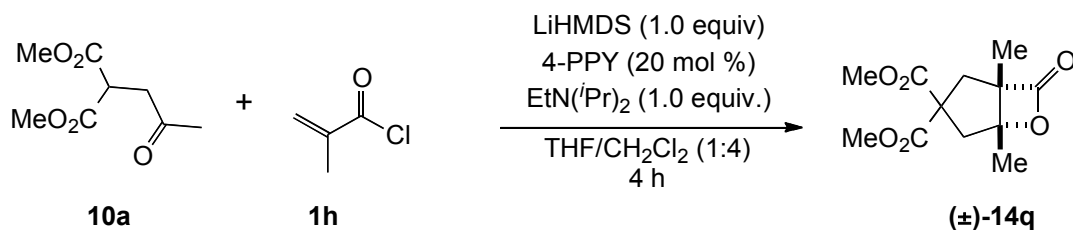



**Dimethyl 1,5-dimethyl-7-oxo-6-oxabicyclo[3.2.0]heptane-3,3-dicarboxylate ((±)-14q).** Prepared according to the representative procedure for (±)-14k, except that methacryloyl chloride (**1h**, 41  $\mu$ L, 0.42 mmol, 1.30 equiv.) was added as the Michael acceptor to afford a single diastereomer of bicyclic- $\beta$ -lactone (±)-14q (64.1 mg, 78%) as a white solid: TLC (EtOAc:hexanes, 2.5:7.5 v/v):  $R_f$  = 0.45;  $^1\text{H}$  NMR (500 MHz;  $\text{CDCl}_3$ ):  $\delta$  3.73 (s, 3H), 3.71 (s, 3H), 3.15 (d,  $J$  = 14 Hz, 1H), 2.98 (d,  $J$  = 15 Hz, 1H), 2.40 (d,  $J$  = 15 Hz, 1H), 1.85 (d,  $J$  = 14 Hz, 1H), 1.52 (s, 3H), 1.27 (s, 3H);  $^{13}\text{C}$  NMR (125 MHz;  $\text{CDCl}_3$ ): 172.4, 170.9, 170.3, 89.3, 62.3, 58.4, 53.4, 53.2, 44.1, 42.1, 18.7, 14.1; IR (thin film): 2986, 2937, 1829, 1739, 1725  $\text{cm}^{-1}$ ; HRMS (ESI+)  $m/z$  calcd. for  $\text{C}_{12}\text{H}_{17}\text{O}_6$   $[\text{M}+\text{H}]^+$ : 257.1025; found 257.1058.

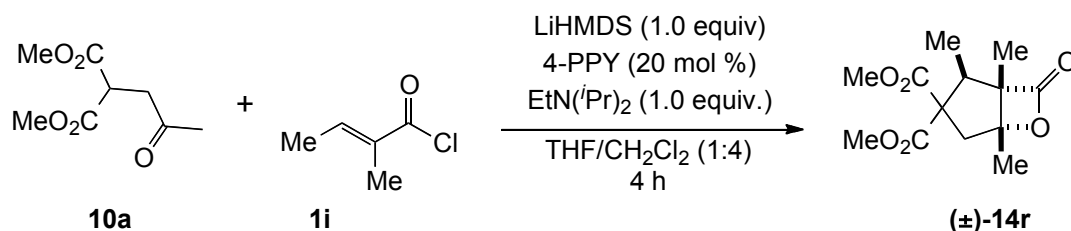

**Dimethyl 1,2,5-trimethyl-7-oxo-6-oxabicyclo [3.2.0]heptane-3,3-dicarboxylate ((±)-14r).** Prepared according to the representative procedure for (±)-14k, except that (*E*)-2-methylbut-2-enoyl chloride (**1i**, 50 mg, 0.42 mmol, 1.30 equiv.) was added as the Michael acceptor, to afford a single diastereomer of bicyclic- $\beta$ -lactone (±)-14r (29.2 mg, 60%) as a white solid: TLC (EtOAc:hexanes, 3:7 v/v):  $R_f$  = 0.20;  $^1\text{H}$  NMR (500 MHz;  $\text{CDCl}_3$ ):  $\delta$  3.75 (s, 3H), 3.74 (s, 3H), 3.38 (q,  $J$  = 8.0 Hz, 1H), 2.86 (d,  $J$  = 15.5 Hz, 1H), 2.58 (d,  $J$  = 15.5 Hz, 1H), 1.52 (s, 3H), 1.21 (s, 3H), 0.78 (d,  $J$  = 8.0 Hz, 3H);  $^{13}\text{C}$  NMR (125 MHz;  $\text{CDCl}_3$ ):  $\delta$  173.0, 170.7, 169.2, 88.8, 64.5, 63.3, 53.3, 53.1, 42.1, 41.7, 19.2, 12.3, 11.4; IR (thin film): 2995, 2928, 1832, 1732, 1728  $\text{cm}^{-1}$ ; HRMS (ESI+)  $m/z$  calcd. for  $\text{C}_{13}\text{H}_{19}\text{O}_6$   $[\text{M}+\text{H}]^+$ : 271.1182; found 271.1159.

**Representative procedure for the enantioselective nucleophile-catalyzed Michael-aldol- $\beta$ -lactonization (NMCAL) process as described for  $\beta$ -lactone (+)-14e.**

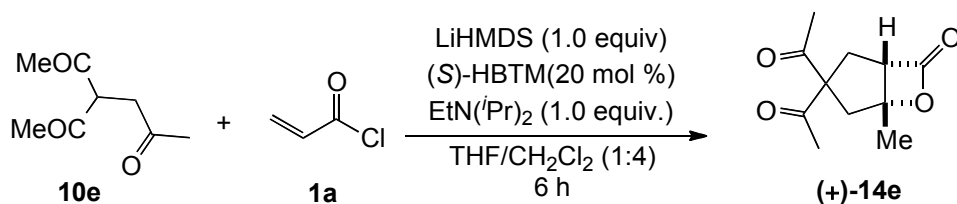

**Methyl-7-oxo-6-oxabicyclo[3.2.0]heptane-3,3-diylldiethanone ((+)-14e).** To an oven-dried, 25 mL round-bottomed flask equipped with a magnetic stir bar was added Michael donor **10e** (49.8 mg, 0.32 mmol, 1.00 equiv.) along with THF (1 mL) and cooled to  $-78\text{ }^\circ\text{C}$ . With vigorous stirring, LiHMDS (320  $\mu\text{L}$  of a 1.0 M solution in THF, 0.32 mmol, 1.00 equiv.) was added dropwise via microliter syringe over  $\sim 4$  min. After the addition the reaction was stirred for 10 min at  $-78\text{ }^\circ\text{C}$  and then warmed to  $0\text{ }^\circ\text{C}$  by switching the dry ice/acetone bath to an ice/water bath. Stirring was continued for an additional 10 min at this temperature, and then  $\text{CH}_2\text{Cl}_2$  (3 mL), (*S*)-HBTM (17 mg, 0.064 mmol, dissolved in 1.1 mL  $\text{CH}_2\text{Cl}_2$ , 0.20 equiv.) and  $\text{EtN}(i\text{Pr})_2$  (60  $\mu\text{L}$ , 0.32 mmol, 1.00 equiv.) were added via microliter syringe sequentially. The reaction was allowed to stir for an additional 10 min at  $0\text{ }^\circ\text{C}$  before acryloyl chloride (**1a**, 261  $\mu\text{L}$  of a 1.612 M solution in  $\text{CH}_2\text{Cl}_2$ , 0.42 mmol, 1.30 equiv.) was added via microliter syringe dropwise over  $\sim 4$  min. After the addition, the ice bath was removed and the reaction stirred for 6 h at ambient temperature ( $23\text{ }^\circ\text{C}$ ). At this time, the reaction was cooled to  $0\text{ }^\circ\text{C}$  and silica gel (2 g) was added and stirred at  $0\text{ }^\circ\text{C}$  for 10 min. Then the ice/water bath was removed and the reaction stirred at ambient temperature ( $23\text{ }^\circ\text{C}$ ) for 20 min. The mixture was then diluted with hexanes (4.0 mL), filtered through a short silica gel pad ( $\sim 2$  g of silica gel), and rinsed with EtOAc (3 x 4 mL). This process removes polar impurities including (*S*)-HBTM. The filtrate was concentrated by rotary evaporation, and following  $^1\text{H}$  NMR analysis of the reaction mixture, it was purified by flash column chromatography ( $\text{SiO}_2$ , 10  $\rightarrow$  50% EtOAc/hexanes) to afford bicyclic- $\beta$ -lactone (**(+)-14e**) (41.2 mg, 61%) as a white solid:  $[\alpha]_D^{21} = +167.34$  ( $c = 1.00$ ,  $\text{CHCl}_3$ ). Enantiomeric excess was determined by HPLC analysis in comparison with authentic racemic material using a Chiralcel AD-H column: hexanes:*i*PrOH = 95:05, flow rate 0.5 mL/min,  $\lambda = 210\text{ nm}$ :  $t_{\text{minor}} = 52.0\text{ min}$ ,  $t_{\text{major}} = 67.4\text{ min}$ ; 95% *ee*. Spectral data matched that reported above for the racemic compound.

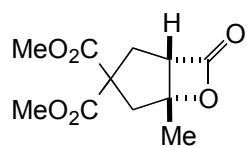**(+)-14a**

**(1*S*,5*R*)-Dimethyl 5-methyl-7-oxo-6-oxabicyclo[3.2.0]heptane-3,3-dicarboxylate ((+)-14a).** Prepared according to the representative procedure using Michael donor **10a** (60.0 mg, 0.32 mmol, 1.00 equiv.), THF (1 mL), LiHMDS (320  $\mu$ L of a 1.0 M solution in THF, 0.32 mmol, 1.00 equiv.), CH<sub>2</sub>Cl<sub>2</sub> (3 mL), (*S*)-HBTM (17 mg, 0.064 mmol, dissolved in 1.1 mL CH<sub>2</sub>Cl<sub>2</sub>, 0.20 equiv.), EtN(*i*Pr)<sub>2</sub> (60  $\mu$ L, 0.32 mmol, 1.00 equiv.), and acryloyl chloride (**1a**, 34  $\mu$ L, 0.42 mmol, dissolved in 260  $\mu$ L CH<sub>2</sub>Cl<sub>2</sub>, 1.30 equiv.). After the addition of acryloyl chloride, the reaction was allowed to react for 6 h at ambient temperature (23 °C). After <sup>1</sup>H NMR analysis of the reaction mixture, it was purified by flash column chromatography (SiO<sub>2</sub>, 20  $\rightarrow$  50% EtOAc/hexanes) to afford bicyclic- $\beta$ -lactone **(+)-14a** (55.8 mg, 72% yield) as a colorless oil:  $[\alpha]_D^{21} = +67.25$  ( $c = 1.00$ , CHCl<sub>3</sub>). Enantiomeric excess was determined by chiral GC analysis in comparison with authentic racemic material;  $t_{\text{minor}} = 253.1$  min,  $t_{\text{major}} = 263.4$  min; 97% *ee*. Spectral data matched that previously reported<sup>16</sup> and absolute stereochemistry was assigned by derivatization below.

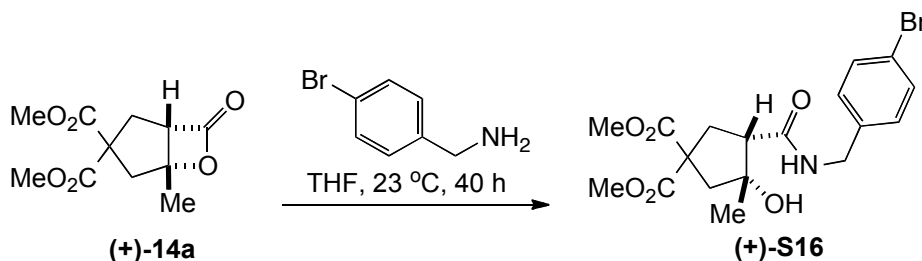

**(3*R*,4*S*)-Dimethyl 4-((4-bromobenzyl)carbamoyl)-3-hydroxy-3-methylcyclopentane 1,1-dicarboxylate ((+)-S16).** To a oven-dried, 5 mL round-bottomed flask was added  $\beta$ -lactone **(+)-14a** (48.5 mg, 0.20 mmol, 1.00 equiv) and *p*-

bromobenzylamine (0.10 mL, 0.80 mmol, 4.00 equiv), in THF (2 mL). The reaction was allowed to stir at ambient temperature (23 °C) for 40 h. Upon completion (as judged by TLC), the reaction was concentrated by rotary evaporation and purified by flash column chromatography (SiO<sub>2</sub>, 20 → 60% EtOAc/hexanes) to afford amide (+)-**S16** (85.5 mg, 65%) as a colorless crystalline solid: m.p. 118–121 °C (recrystallized from CDCl<sub>3</sub>); TLC (EtOAc:hexanes, 5:5 v/v): R<sub>f</sub> = 0.35;  $[\alpha]_D^{21} = +8.00$  (*c* = 1.00, CHCl<sub>3</sub>). <sup>1</sup>H NMR (500 MHz; CDCl<sub>3</sub>): δ 7.46 (d, *J* = 8.3 Hz, 2H), 7.14 (d, *J* = 8.3 Hz, 2H), 6.38 (brs, 1H), 4.45–4.37 (m, 2H), 3.76 (s, 3H), 3.72 (s, 3H), 2.80 (t, *J* = 12.7 Hz, 1H), 2.67–2.58 (m, 2H), 2.52 (dd, *J* = 12.1, 7.9 Hz, 1H), 2.13 (d, *J* = 14.3 Hz, 1H), 1.37 (s, 3H); <sup>13</sup>C NMR (125 MHz; CDCl<sub>3</sub>): δ 173.3, 173.1, 172.7, 137.1, 132.1(2), 129.6(2), 121.8, 80.0, 58.0, 53.8, 53.4, 53.3, 48.5, 43.0, 37.5, 25.7; IR (thin film): 3336, 2960, 2922, 1732, 1637 cm<sup>-1</sup>; HRMS (ESI+) *m/z* calcd for C<sub>18</sub>H<sub>23</sub>BrNO<sub>6</sub> [M+H]<sup>+</sup>: 428.0709; found 428.0692.

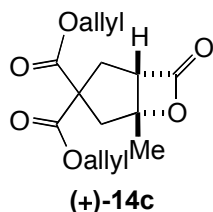

**(1*R*,5*S*)-Diallyl 5-methyl-7-oxo-6-oxabicyclo[3.2.0]heptane-3,3-dicarboxylate ((+)-14c)**. Prepared according to the representative procedure using Michael donor **10c** (76.8 mg, 0.32 mmol), THF (1 mL), LiHMDS (320 μL of a 1.0 M solution in THF, 0.32 mmol, 1.00 equiv.), CH<sub>2</sub>Cl<sub>2</sub> (3 mL), (*S*)-HBTM (17 mg, 0.064 mmol, dissolved in 1.1 mL CH<sub>2</sub>Cl<sub>2</sub>, 0.20 equiv.), EtN(<sup>*i*</sup>Pr)<sub>2</sub> (60 μL, 0.32 mmol, 1.00 equiv.), and acryloyl chloride (**1a**, 34 μL, 0.42 mmol, dissolved in 260 μL CH<sub>2</sub>Cl<sub>2</sub>, 1.30 equiv.). After the addition of acryloyl chloride the reaction was allowed to react for 6 h at ambient temperature (23 °C). Purification by flash column chromatography afforded bicyclic-β-lactone (+)-**14c** (69 mg, 73%) as a colorless oil:  $[\alpha]_D^{21} = +39.8$  (*c* = 0.200, CHCl<sub>3</sub>). Enantiomeric excess was determined by HPLC analysis in comparison with authentic racemic material using a Chiralcel IA column: hexanes:*i*PrOH = 92:08, flow rate 0.5 mL/min, λ = 210 nm: *t*<sub>major</sub> = 17.3 min, *t*<sub>minor</sub> = 21.3 min; 95% *ee*. Spectral data matched

that reported above for the racemic compound that reported above for the racemic compound.

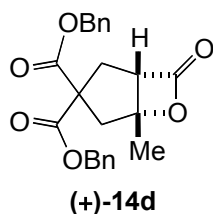

**(1*S*,5*R*)-Dibenzyl 5-methyl-7-oxo-6-oxabicyclo[3.2.0]heptane-3,3-dicarboxylate ((+)-14d).** Prepared according to the representative procedure using Michael donor **10d** (11.78 mg, 0.35 mmol, 1.0 equiv.), THF (1 mL), LiHMDS (256  $\mu$ L of a 1.0 M solution in THF, 0.26 mmol, 0.74 equiv.),  $\text{CH}_2\text{Cl}_2$  (3 mL), (*S*)-HBTM (10.4 mg, 0.033 mmol, dissolved in 1.1 mL  $\text{CH}_2\text{Cl}_2$ , 0.10 equiv.),  $\text{EtN}(\text{Pr})_2$  (48  $\mu$ L, 0.28 mmol, 0.92 equiv.), and acryloyl chloride (**1a**, 34  $\mu$ L, 0.42 mmol, dissolved in 227  $\mu$ L  $\text{CH}_2\text{Cl}_2$ , 1.20 equiv.). After the addition of acryloyl chloride, the reaction was allowed to react for 6 h at ambient temperature (23  $^\circ\text{C}$ ). Purification by flash column chromatography afforded bicyclic- $\beta$ -lactone **(+)-14d** (59.2 mg, 59%) as a colorless oil:  $[\alpha]_D^{21} = +41.3$  ( $c = 0.36$ ,  $\text{CHCl}_3$ ). Enantiomeric excess was determined by HPLC analysis in comparison with authentic racemic material using a Chiralcel OD-H column: hexanes:*i*PrOH = 95:05, flow rate 1.0 mL/min,  $\lambda = 210$  nm:  $t_{\text{major}} = 36.6$  min,  $t_{\text{minor}} = 45.6$  min; 98% *ee*. Spectral data matched that reported above for the racemic compound.

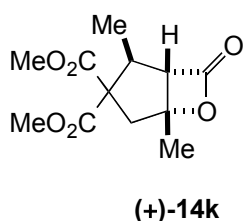

**(1*S*,2*S*,5*R*)-Dimethyl 2,5-dimethyl-7-oxo-6-oxabicyclo[3.2.0]heptane-3,3-dicarboxylate ((+)-14k).** Prepared according to the representative procedure using Michael donor **10a** (60.0 mg, 0.32 mmol, 1.00 equiv.), THF (1 mL), LiHMDS (320  $\mu$ L of a 1.0 M solution in THF, 0.32 mmol, 1.00 equiv.),  $\text{CH}_2\text{Cl}_2$  (4 mL), (*S*)-HBTM (17

mg, 0.064 mmol, dissolved in 1.1 mL CH<sub>2</sub>Cl<sub>2</sub>, 0.20 equiv.), EtN(*i*Pr)<sub>2</sub> (60 μL, 0.32 mmol, 1.00 equiv.), and (*E*)-but-2-enoyl chloride (**1b**, 40 μL, 0.42 mmol, dissolved in 2 mL CH<sub>2</sub>Cl<sub>2</sub>, 1.30 equiv.). The solution of (*E*)-but-2-enoyl chloride was added by syringe pump over 2 h at 0 °C. After the addition of (*E*)-but-2-enoyl chloride, the reaction was allowed to react for 16 h at room temperature (23 °C) as opposed to the standard 6 h. Purification by flash column chromatography afforded a single diastereomer of bicyclic-β-lactone (+)-**14k** (64.5 mg, 80%) a colorless solid:  $[\alpha]_D^{21} = +116.51$  (*c* = 1.00, CHCl<sub>3</sub>). Enantiomeric excess was determined by HPLC analysis in comparison with authentic racemic material using a Chiralcel OD-H column: hexanes:*i*PrOH = 90:10, flow rate 0.5 mL/min, λ = 210 nm: *t*<sub>major</sub> = 22.4 min, *t*<sub>minor</sub> = 29.1 min 94% *ee*. Spectral data matched that reported above for the racemic compound.

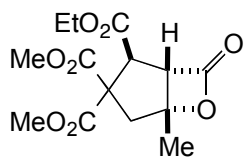

(+)-**14l**

**(1*R*,2*R*,5*S*)-2-Ethyl 3,3-dimethyl 5-methyl-7-oxo-6-oxabicyclo[3.2.0]heptane-2,3,3-tricarboxylate ((+)-14l)**. Prepared according to the representative procedure using Michael donor **10a** (60.0 mg, 0.32 mmol, 1.00 equiv.), THF (1 mL), LiHMDS (320 μL of a 1.0 M solution in THF, 0.32 mmol, 1.00 equiv.), CH<sub>2</sub>Cl<sub>2</sub> (3 mL), (*S*)-HBTM (17 mg, 0.064 mmol, dissolved in 1.1 mL CH<sub>2</sub>Cl<sub>2</sub>, 0.20 equiv.), EtN(*i*Pr)<sub>2</sub> (60 μL, 0.32 mmol), and ethyl fumaroyl chloride (**1c**, 68.2 μL, 0.42 mmol, dissolved in 260 μL CH<sub>2</sub>Cl<sub>2</sub>, 1.30 equiv.). After the addition of ethyl fumaroyl chloride, the reaction was allowed to react for 24 h at room temperature (23 °C) as opposed to the standard 6 h. Purification by an automated flash chromatography system (gradient of EtOAc/hexanes) afforded a single diastereomer of bicyclic-β-lactone (+)-**14l** (95.2 mg, 95%) a yellow oil:  $[\alpha]_D^{21} = +109.5$  (*c* = 1.00, CHCl<sub>3</sub>). Enantiomeric excess was determined by HPLC analysis in comparison with authentic racemic material using a Chiralcel AD-H column: hexanes:*i*PrOH = 88:12, flow rate 0.9 mL/min, λ = 230 nm:

$t_{\text{major}} = 9.2$  min,  $t_{\text{minor}} = 16.2$  min; 90% *ee*. Spectral data matched that reported above for the racemic compound.

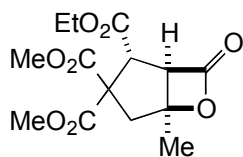

**(-)-14l**

**(1*S*,2*S*,5*R*)-2-Ethyl 3,3-dimethyl 5-methyl-7-oxo-6-oxabicyclo[3.2.0]heptane-2,3,3-tricarboxylate ((-)-14l)**. Prepared according to the representative procedure using Michael donor **10a** (60.0 mg, 0.32 mmol, 1.00 equiv.), THF (1 mL), LiHMDS (320  $\mu$ L of a 1.0 M solution in THF, 0.32 mmol, 1.00 equiv.),  $\text{CH}_2\text{Cl}_2$  (3 mL), (*R*)-HBTM (17 mg, 0.064 mmol, dissolved in 1.1 mL  $\text{CH}_2\text{Cl}_2$ , 0.20 equiv.),  $\text{EtN}(i\text{Pr})_2$  (60  $\mu$ L, 0.32 mmol, 1.00 equiv.), and ethyl fumaroyl chloride (**1c**, 68.2 mg, 0.42 mmol, dissolved in 260  $\mu$ L  $\text{CH}_2\text{Cl}_2$ , 1.30 equiv.). After complete addition, the reaction was allowed to react for 24 h at room temperature (23  $^\circ\text{C}$ ) as opposed to the standard 6 h. Purification by an automated flash chromatography system (gradient of EtOAc/hexanes) afforded a single diastereomer of bicyclic- $\beta$ -lactone **(-)-14l** (90.6 mg, 90%) as a yellow oil:  $[\alpha]_D^{21} = -109.9$  ( $c = 1.00$ ,  $\text{CHCl}_3$ ). Enantiomeric excess was determined by HPLC analysis in comparison with authentic racemic material using a Chiralcel AD-H column: hexanes:*i*PrOH = 88:12, flow rate 0.9 mL/min,  $\lambda = 230$  nm:  $t_{\text{minor}} = 9.2$  min,  $t_{\text{major}} = 15.8$  min; 89% *ee*. Spectral data matched that reported above for the racemic compound.

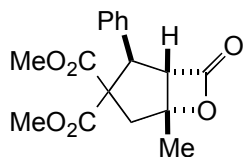

**(+)-14m**

**(1*S*,2*R*,5*R*)-Dimethyl 5-methyl-7-oxo-2-phenyl-6-oxabicyclo[3.2.0]heptane-3,3-dicarboxylate ((+)-14m)**. Prepared according to the representative procedure using

Michael donor **10a** (60.8 mg, 0.32 mmol, 1.00 equiv.), THF (1 mL), LiHMDS (320  $\mu$ L of a 1.0 M solution in THF, 0.32 mmol, 1.00 equiv.),  $\text{CH}_2\text{Cl}_2$  (3 mL), (*S*)-HBTM (17 mg, 0.064 mmol, dissolved in 400  $\mu$ L  $\text{CH}_2\text{Cl}_2$ , 0.20 equiv.),  $\text{EtN}(\textit{i}\text{Pr})_2$  (60  $\mu$ L, 0.32 mmol, 1.00 equiv.), and cinnamoyl chloride (**1d**, 67.7 mg, 0.35 mmol, dissolved in 2.6 mL  $\text{CH}_2\text{Cl}_2$ , 1.10 equiv.). The solution of cinnamoyl chloride was added by syringe pump over 2 h at 0  $^\circ\text{C}$ . After the addition of cinnamoyl chloride, the reaction was allowed to react for 18 h at room temperature (23  $^\circ\text{C}$ ) as opposed to the standard 6 h. Purification by flash column chromatography afforded a single diastereomer of bicyclic- $\beta$ -lactone **(+)-14m** (82.3 mg, 80%) as a white solid:  $[\alpha]_D^{21} = +188.23$  ( $c = 0.17$ ,  $\text{CHCl}_3$ ). Enantiomeric excess was determined by HPLC analysis in comparison with authentic racemic material using a Chiralcel AD-H column: hexanes:*i*PrOH = 70:30, flow rate 0.5 mL/min,  $\lambda = 210$  nm:  $t_{\text{major}} = 12.0$  min,  $t_{\text{minor}} = 13.1$  min; 99% *ee*. Spectral data matched that reported above for the racemic compound.

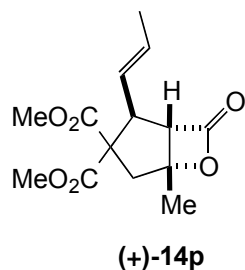

**(1*S*,2*S*,5*R*)-Dimethyl-5-methyl-7-oxo-2-((*E*)-prop-1-en-1-yl)-6-oxabicyclo[3.2.0]**

**heptane-3,3-dicarboxylate ((+)-14p)**. Prepared according to the representative procedure using Michael donor **10a** (60.0 mg, 0.32 mmol, 1.00 equiv.), THF (1 mL), LiHMDS (320  $\mu$ L of a 1.0 M solution in THF, 0.32 mmol, 1.00 equiv.),  $\text{CH}_2\text{Cl}_2$  (4 mL), (*S*)-HBTM (17 mg, 0.064 mmol, dissolved in 1 mL  $\text{CH}_2\text{Cl}_2$ , 0.20 equiv.),  $\text{EtN}(\textit{i}\text{Pr})_2$  (60  $\mu$ L, 0.32 mmol, 1.00 equiv.), and sorbic chloride (**1g**, 51.4  $\mu$ L, 0.42 mmol, dissolved in 2 mL  $\text{CH}_2\text{Cl}_2$ , 1.3 equiv.). The solution of sorbic chloride was added by syringe pump over 2 h at 0  $^\circ\text{C}$ . After the addition of sorbic chloride, the reaction was allowed to react for 16 h at room temperature (23  $^\circ\text{C}$ ) as opposed to the standard 6 h. Purification by flash column chromatography afforded a single diastereomer of bicyclic- $\beta$ -lactone **(+)-14p** (56.0 mg, 62%) a white crystalline solid:



m.p. 98–102 °C (recrystallized from  $\text{CDCl}_3$ );  $[\alpha]_D^{21} = +140.00$  ( $c = 1.00$ ,  $\text{CHCl}_3$ ). Enantiomeric excess was determined by HPLC analysis in comparison with authentic racemic material using a Chiralcel AD-H column: hexanes:*i*PrOH = 70:30, flow rate 0.5 mL/min,  $\lambda = 210$  nm:  $t_{\text{major}} = 22.2$  min,  $t_{\text{minor}} = 27.1$  min; 99% *ee*. Spectral data matched that reported above for the racemic compound.

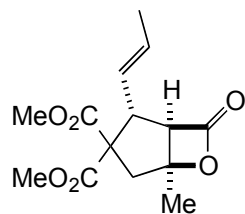

**(-)-14p**

**(1*R*,2*R*,5*S*)-Dimethyl5-methyl-7-oxo-2-((*E*)-prop-1-en-1-yl)-6-oxabicyclo[3.2.0]heptane-3,3-dicarboxylate ((-)-14p).** Prepared according to the representative procedure using Michael donor **10a** (60.0 mg, 0.32 mmol, 1.00 equiv.), THF (1 mL), LiHMDS (320  $\mu\text{L}$  of a 1.0 M solution in THF, 0.32 mmol, 1.00 equiv.),  $\text{CH}_2\text{Cl}_2$  (3 mL), (*R*)-HBTM (17 mg, 0.064 mmol, dissolved in 1 mL  $\text{CH}_2\text{Cl}_2$ , 0.20 equiv.),  $\text{EtN}(\text{Pr})_2$  (60  $\mu\text{L}$ , 0.32 mmol, 1.00 equiv.), and sorbic chloride (**1g**, 51.4  $\mu\text{L}$ , 0.42 mmol, dissolved in 2 mL  $\text{CH}_2\text{Cl}_2$ , 1.30 equiv.). The solution of sorbic chloride was added by syringe pump over 2 h at 0 °C. After the addition of sorbic chloride, the reaction was allowed to react for 21 h at room temperature (23 °C) as opposed to the standard 6 h. Purification by flash column chromatography afforded a single diastereomer of bicyclic- $\beta$ -lactone **(-)-14p** (54.2 mg, 60%) a colorless solid:  $[\alpha]_D^{21} = -138.00$  ( $c = 1.00$ ,  $\text{CHCl}_3$ ). Enantiomeric excess was determined by HPLC analysis in comparison with authentic racemic material using a Chiralcel AD-H column: hexanes:*i*PrOH = 70:30, flow rate 0.5 mL/min,  $\lambda = 210$  nm:  $t_{\text{minor}} = 22.2$  min,  $t_{\text{major}} = 27.2$  min; 99% *ee*. Spectral data matched that reported above for the racemic compound.

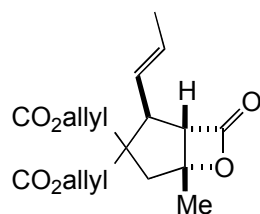**(+)-14s**

**(1*S*,2*S*,5*R*)-Diallyl-1,5-dimethyl-7-oxo-2-((*E*)-prop-1-en-1-yl)-6-oxabicyclo[3.2.0]heptane-3,3-dicarboxylate ((+)-14s).** Prepared according to the representative procedure using Michael donor **10c** (60.0 mg, 0.32 mmol, 1.00 equiv.), THF (1 mL), LiHMDS (320  $\mu$ L of a 1.0 M solution in THF, 0.32 mmol, 1.00 equiv.), CH<sub>2</sub>Cl<sub>2</sub> (3 mL), (*S*)-HBTM (17 mg, 0.064 mmol, dissolved in 1 mL CH<sub>2</sub>Cl<sub>2</sub>, 0.20 equiv.), EtN(<sup>*i*</sup>Pr)<sub>2</sub> (60  $\mu$ L, 0.32 mmol, 1.00 equiv.), and sorbic chloride (**1g**, 51.4  $\mu$ L, 0.42 mmol, dissolved in 2 mL CH<sub>2</sub>Cl<sub>2</sub>, 1.30 equiv.). The solution of sorbic chloride was added by syringe pump over 2 h at 0 °C. After the addition of sorbic chloride, the reaction was allowed to react for 21 h at room temperature (23 °C) as opposed to the standard 6 h. Purification by flash column chromatography afforded a single diastereomer of bicyclic- $\beta$ -lactone (+)-**14s** (58.8 mg, 55%) a colorless oil: TLC (EtOAc:hexanes, 2:8 *v/v*):  $R_f = 0.64$ ;  $[\alpha]_D^{21} = +76.8$  ( $c = 0.53$ , CHCl<sub>3</sub>). Enantiomeric excess was determined by HPLC analysis in comparison with authentic racemic material using a Chiralcel AD-H column: hexanes:*i*PrOH = 95:05, flow rate 0.5 mL/min,  $\lambda = 210$  nm:  $t_{\text{major}} = 17.7$  min,  $t_{\text{minor}} = 25.5$  min; 94% *ee*. <sup>1</sup>H NMR (500 MHz; CDCl<sub>3</sub>):  $\delta$  5.91-5.77 (m, 2H), 5.62-5.57 (m, 1H), 5.34-5.21 (m, 4H), 5.14-5.08 (m, 1H), 4.69-4.61 (m, 2H), 4.58-4.50 (m, 2H), 3.95 (d,  $J = 10.0$  Hz, 1H), 3.35 (s, 1H), 2.87 (d,  $J = 15.7$  Hz, 1H), 2.69 (d,  $J = 15.7$  Hz, 1H), 1.73 (s, 3H), 1.63 (dd,  $J = 6.5, 1.7$  Hz, 3H); <sup>13</sup>C NMR (125 MHz; CDCl<sub>3</sub>):  $\delta$  169.7, 168.1, 167.7, 131.5, 131.4, 130.3, 126.5, 119.3, 119.1, 86.5, 67.1, 66.7, 65.5, 64.7, 48.7, 41.7, 22.2, 18.0; IR (thin film): 2940, 2857, 1835, 1741, 1270, 1149 cm<sup>-1</sup>; HRMS (ESI+)  $m/z$  calcd. for C<sub>18</sub>H<sub>22</sub>LiO<sub>6</sub> [M+Li]<sup>+</sup>: 341.1576; found 341.1562.

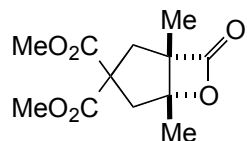**(+)-14q**

**(1*S*,5*R*)-Dimethyl 1,5-dimethyl-7-oxo-6-oxabicyclo[3.2.0]heptane-3,3-dicarboxylate ((+)-14q).**

Prepared according to the representative procedure using Michael donor **10a** (60.0 mg, 0.32 mmol, 1.00 equiv.), THF (1 mL), LiHMDS (320  $\mu$ L of a 1.0 M solution in THF, 0.32 mmol, 1.00 equiv.), CH<sub>2</sub>Cl<sub>2</sub> (3 mL), (*S*)-HBTM (17 mg, 0.064 mmol, dissolved in 1 mL CH<sub>2</sub>Cl<sub>2</sub>, 0.20 equiv.), EtN(*i*Pr)<sub>2</sub> (60  $\mu$ L, 0.32 mmol, 1.00 equiv.), and methacryloyl chloride (**1h**, 41.0  $\mu$ L, 0.42 mmol, dissolved in 2 mL CH<sub>2</sub>Cl<sub>2</sub>, 1.30 equiv.). The solution of methacryloyl chloride was added by syringe pump over 2 h at 0 °C. After the addition of methacryloyl chloride the reaction was allowed to react for 18 h at room temperature (23 °C) as opposed to the standard 6 h. Purification by flash column chromatography afforded a single diastereomer of bicyclic- $\beta$ -lactone **(+)-14q** (65.4 mg, 80%) as colorless solid:  $[\alpha]_D^{21} = +83.3$  ( $c = 0.24$ , CHCl<sub>3</sub>). Enantiomeric excess was determined by HPLC analysis in comparison with authentic racemic material using a Chiralcel OD-H column: hexanes:*i*PrOH = 92:08, flow rate 1.0 mL/min,  $\lambda = 210$  nm:  $t_{\text{minor}} = 12.3$  min,  $t_{\text{major}} = 15.2$  min; 99% *ee*. Spectral data matched that reported above for the racemic compound.

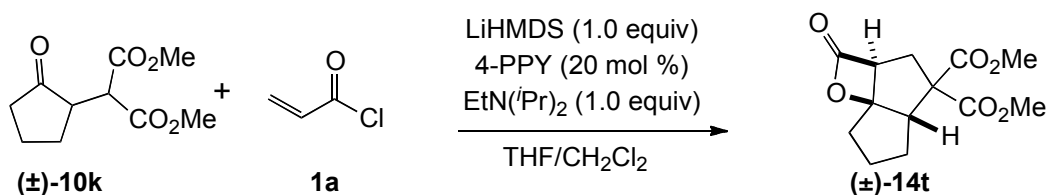

**Dimethyl 2-oxohexahydropentaleno[6a,1-*b*]oxete-4,4(2*H*)-dicarboxylate ((±)-14t).**

Prepared according to the representative procedure for **(±)-14a**, except that Michael donor **(±)-10k** (68.0 mg, 0.32 mmol, 1.00 equiv.) was used, along with THF (1 mL), LiHMDS (320  $\mu$ L of a 1.0 M solution in THF, 0.32 mmol, 1.00 equiv.), CH<sub>2</sub>Cl<sub>2</sub> (4 mL), 4-PPY (80  $\mu$ L of a 0.82 M solution in CH<sub>2</sub>Cl<sub>2</sub>, 0.064 mmol, 0.20 equiv.), EtN(*i*Pr)<sub>2</sub> (60  $\mu$ L, 0.32 mmol, 1.00 equiv.), and acryloyl chloride (**1a**, 261  $\mu$ L of a

1.612 M solution in CH<sub>2</sub>Cl<sub>2</sub>, 0.42 mmol, 1.30 equiv.). After addition of acryloyl chloride, the reaction was allowed to react for 24 h at ambient temperature (23 °C) as opposed to the standard 6 h. The mixture was then diluted with hexanes (4.0 mL), filtered through a short silica gel pad (~2 g of silica gel), and rinsed with EtOAc (3 x 4 mL). The filtrate was then concentrated by rotary evaporation the resulting oil was of sufficient purity to warrant no further purification affording a single diastereomer of tricyclic-β-lactone (**(±)-14t**) (77.7 mg, 91%): as a colorless oil: TLC (EtOAc:hexanes, 3:7 v/v): R<sub>f</sub> = 0.43; <sup>1</sup>H NMR (500 MHz; CDCl<sub>3</sub>): δ 3.74 (s, 3H), 3.71 (s, 3H), 3.60-3.58 (m, 1H), 3.50 (dd, *J* = 11.1, 8.2 Hz, 1H), 2.84 (d, *J* = 15.0 Hz, 1H), 2.64 (dd, *J* = 15.0, 9.0 Hz, 1H), 2.32-2.27 (m, 1H), 2.15 (m, 1H), 1.92-1.82 (m, 2H), 1.75 (m, 1H), 1.30-1.23 (m, 1H); <sup>13</sup>C NMR (125 MHz; CDCl<sub>3</sub>): δ 170.4, 169.5 (2), 95.7, 63.4, 59.4, 53.5, 53.2, 52.0, 31.7, 31.5, 27.3, 23.3; IR (thin film): 2363, 2340, 1824, 1732 cm<sup>-1</sup>; HRMS (ESI+) *m/z* calcd. for C<sub>13</sub>H<sub>16</sub>O<sub>6</sub>Li [M+Li]<sup>+</sup>: 275.1107; found 275.1106.

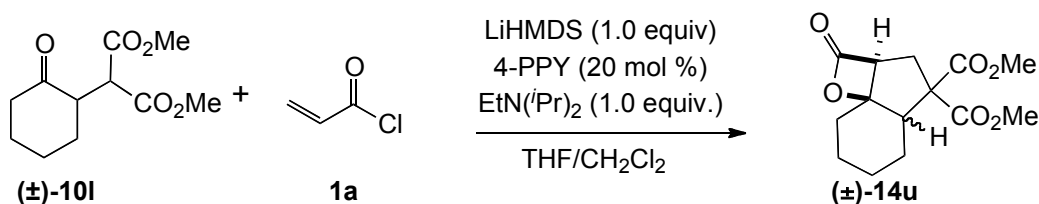

**Dimethyl 2-oxohexahydro-2H-indeno[7a,1-b]oxete-4,4(4aH)-dicarboxylate ((±)-14u).** Prepared according to the representative procedure for (**(±)-14a**), except that Michael donor (**(±)-10l**) (73.1 mg, 0.32 mmol, 1.00 equiv.), THF (1 mL), LiHMDS (320 μL of a 1.0 M solution in THF, 0.32 mmol, 1.00 equiv.), CH<sub>2</sub>Cl<sub>2</sub> (4 mL), 4-PPY (80 μL of a 0.82 M solution in CH<sub>2</sub>Cl<sub>2</sub>, 0.064 mmol, 0.20 equiv.), EtN(iPr)<sub>2</sub> (60 μL, 0.32 mmol), and acryloyl chloride (**1a**, 261 μL of a 1.612 M solution in CH<sub>2</sub>Cl<sub>2</sub>, 0.42 mmol, 1.30 equiv.). After addition of acryloyl chloride, the reaction was allowed to react for 24 h at ambient temperature (23 °C) as opposed to the standard 6 h. Purification by flash column chromatography (SiO<sub>2</sub>, 10 → 30% EtOAc/hexanes) afforded a mixture of diastereomers (1:1) of bicyclic-β-lactone (**(±)-14u**) (61.0 mg, 70%) as a colorless oil: TLC (EtOAc:hexanes, 3:7 v/v): R<sub>f</sub> = 0.41; (NMR data is provided for the 1:1 mixture of diastereomers); <sup>1</sup>H NMR (500 MHz; CDCl<sub>3</sub>): δ 3.77-3.69 (m, 12H), 3.44 (dd, *J* = 11.3, 8.9 Hz, 2H), 3.17 (dd, *J* = 12.9, 5.8 Hz, 1H), 3.04 (d, *J* = 14.0 Hz, 1H), 2.96 (d, *J*

= 14.8 Hz, 1H), 2.70 (dd,  $J = 14.8, 9.1$  Hz, 1H), 2.42 (dd,  $J = 12.5, 3.7$  Hz, 1H), 2.13-2.09 (m, 2H), 2.05-1.87 (m, 5H), 1.79-1.72 (m, 4H), 1.67-1.51 (m, 2H), 1.40-1.11 (m, 3H), 0.92 (m, 1H);  $^{13}\text{C}$  NMR (125 MHz;  $\text{CDCl}_3$ ):  $\delta$  171.0, 169.91, 169.86, 169.5, 169.2, 168.7, 88.9, 88.6, 64.7, 61.1, 55.6, 55.2, 53.4, 53.3, 53.2, 52.6, 51.9, 47.6, 34.1, 32.8, 31.7, 31.0, 26.6, 25.5, 24.4, 24.1, 23.7, 22.1; IR (thin film): 2958, 2863, 1830, 1735  $\text{cm}^{-1}$ ; HRMS (ESI+)  $m/z$  calcd. for  $\text{C}_{14}\text{H}_{18}\text{O}_6\text{Li}$   $[\text{M}+\text{Li}]^+$ : 289.1263; found 289.1277.

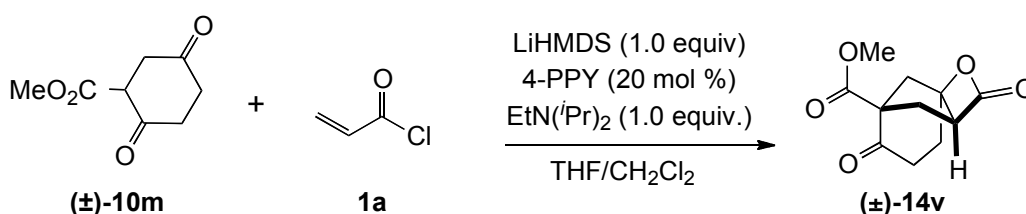

**Methyl 3,7-dioxo-2-oxatricyclo[4.3.1.01,4]decane-6-carboxylate ((±)-14v).** Prepared according to the representative procedure using methyl 2,5-dioxocyclohexanecarboxylate<sup>17</sup> ((±)-**10m**, 27 mg, 0.16 mmol, 1.00 equiv.) as the Michael donor, THF (0.5 mL), LiHMDS (160  $\mu\text{L}$  of a 1.0 M solution in THF, 0.16 mmol, 1.00 equiv.),  $\text{CH}_2\text{Cl}_2$  (2 mL), 4-PPY (40  $\mu\text{L}$  of a 0.82 M solution in  $\text{CH}_2\text{Cl}_2$ , 0.032 mmol, 0.20 equiv.),  $\text{EtN}(\text{iPr})_2$  (30  $\mu\text{L}$ , 0.16 mmol, 1.00 equiv.), and acryloyl chloride (**1a**, 130  $\mu\text{L}$  of a 1.6 M solution in  $\text{CH}_2\text{Cl}_2$ , 0.21 mmol, 1.30 equiv.). After addition of acryloyl chloride, the reaction was allowed to react for 8 h at ambient temperature (23  $^\circ\text{C}$ ). Purification by flash column chromatography ( $\text{SiO}_2$ , 10  $\rightarrow$  50% EtOAc/hexanes) afforded a single diastereomer of bicyclic- $\beta$ -lactone ((±)-**14v** (9.0 mg, 25%) as a white solid: TLC (EtOAc:hexanes, 5:5 v/v):  $R_f = 0.55$ ;  $^1\text{H}$  NMR (500 MHz;  $\text{CDCl}_3$ ):  $\delta$  3.74 (s, 3H), 3.68 (dd,  $J = 8.5, 7.0$  Hz, 1H), 3.93 (m, 1H), 2.77 (dd,  $J = 12.0, 1.0$  Hz, 1H), 2.65 (m, 3H), 2.29 (m, 2H), 2.16 (m, 1H);  $^{13}\text{C}$  NMR (125 MHz;  $\text{CDCl}_3$ ):  $\delta$  205.6, 168.6, 168.3, 82.9, 69.9, 57.5, 52.8, 42.3, 37.0, 32.0, 28.3; IR (thin film): 2963, 2874, 1829, 1742, 1735  $\text{cm}^{-1}$ ; HRMS (ESI+)  $m/z$  calcd. for  $\text{C}_{11}\text{H}_{13}\text{O}_5$   $[\text{M}+\text{H}]^+$ :

<sup>17</sup> Tan, B., Lu, Y., Zeng, X.; Chua, P. J., Zhong, G. Facile domino access to chiral bicyclo[3.2.1]octanes and discovery of a new catalytic activation mode. *Org. Lett.* **12**, 2682-2685 (2010).

225.0763; found 225.0798.

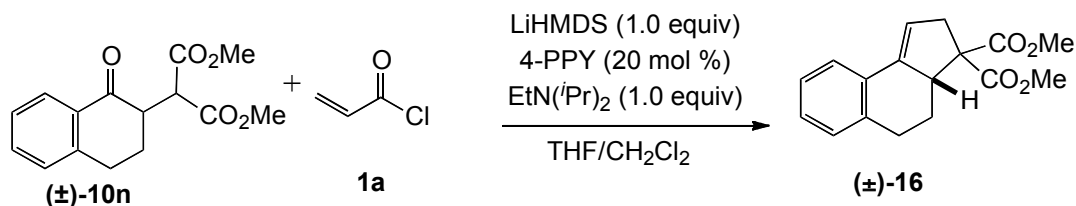

**Dimethyl 4,5-dihydro-2*H*-cyclopenta[*a*]naphthalene-3,3(3*aH*)-dicarboxylate ((±)-16).** Prepared according to the representative procedure using Michael donor **(±)-10n** (88.4 mg, 0.32 mmol, 1.00 equiv.), THF (1 mL), LiHMDS (320  $\mu$ L of a 1.0 M solution in THF, 0.32 mmol, 1.00 equiv.), CH<sub>2</sub>Cl<sub>2</sub> (4 mL), 4-PPY (80  $\mu$ L of a 0.82 M solution in CH<sub>2</sub>Cl<sub>2</sub>, 0.064 mmol, 0.20 equiv.), EtN(*i*Pr)<sub>2</sub> (60  $\mu$ L, 0.32 mmol, 1.00 equiv.), and acryloyl chloride (**1a**, 261  $\mu$ L of a 1.612 M solution in CH<sub>2</sub>Cl<sub>2</sub>, 0.42 mmol, 1.30 equiv.). After addition of acryloyl chloride, the reaction was allowed to react for 12 h at ambient temperature (23 °C) as opposed to the standard 6 h. Purification by flash column chromatography (SiO<sub>2</sub>, 5  $\rightarrow$  30% EtOAc/hexanes) afforded tricyclic compound **(±)-16** as a white solid (50 mg, 55%): TLC (EtOAc:hexanes, 3:7 v/v): R<sub>f</sub> = 0.69; <sup>1</sup>H NMR (500 MHz; CDCl<sub>3</sub>):  $\delta$  7.54 (t, *J* = 4.5 Hz, 1H), 7.12-7.07 (m, 3H), 6.00 (q, *J* = 2.6 Hz, 1H), 3.76 (s, 3H), 3.69-3.67 (m, 1H), 3.67 (s, 3H), 3.28 (dt, *J* = 17.4, 2.5 Hz, 1H), 2.97-2.93 (m, 1H), 2.85 (ddd, *J* = 16.6, 4.4, 2.4 Hz, 1H), 2.78 (dt, *J* = 17.4, 2.4 Hz, 1H), 2.21-2.17 (m, 1H), 1.33 (qd, *J* = 12.7, 4.6 Hz, 1H); <sup>13</sup>C NMR (125 MHz; CDCl<sub>3</sub>):  $\delta$  172.6, 171.2, 139.1, 136.6, 131.3, 129.1, 127.7, 126.3, 124.9, 118.2, 63.2, 52.9, 52.4, 50.1, 40.7, 30.8, 26.1; IR (thin film): 1735, 1270, 1243 cm<sup>-1</sup>; HRMS (ESI+) *m/z* calcd. for C<sub>17</sub>H<sub>18</sub>LiO<sub>4</sub> [M+Li]<sup>+</sup>: 293.1365; found 293.1375.

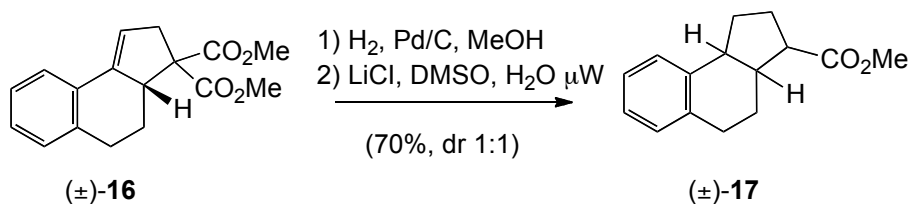

**Methyl 2,3,3a,4,5,9b-hexahydro-1H-cyclopenta[*a*]naphthalene-3-carboxylate ((±)-17).** To an oven dried, round-bottomed flask containing (±)-16 (39.0 mg, 0.14 mmol, 1.0 equiv.) and 20% Pd/C (12.0 mg, 0.2 equiv.) was added MeOH (15 mL). The reaction was then purged with H<sub>2</sub> gas, and stirred at ambient temperature (23 °C) under a H<sub>2</sub> atmosphere (1 atm, balloon) for 2 h. The H<sub>2</sub> balloon was removed and the reaction was filtered through celite to remove the Pd. This was of sufficient purity to warrant no further purification affording a single diastereomer, which was immediately carried on by dissolving in DMSO (0.60mL) and H<sub>2</sub>O (60 μL) in a microwave reaction tube. To this mixture was added LiCl (60.0 mg, 1.4 mmol, 10.0 equiv) and the reaction was placed in a microwave reactor and heated to 180 °C for 20 min. Then NaHCO<sub>3</sub> (4 mL) was added to the reaction mixture and it was extracted with Et<sub>2</sub>O (3 x 4 mL). The organic layer was washed with brine (2 x 4 mL), collected and dried over MgSO<sub>4</sub>, filtered, concentrated by rotary evaporation, and purified by flash column chromatography (gradient SiO<sub>2</sub>, 0 → 15% EtOAc/hexanes) afforded a mixture of diastereomers (1:1) of monoester (±)-17 (22.57 mg, 70%) as a colorless oil: TLC (EtOAc:hexanes, 1:9 v/v): R<sub>f</sub> = 0.67; (NMR data is provided for the 1:1 mixture of diastereomers)<sup>1</sup>H NMR (500 MHz; CDCl<sub>3</sub>): δ 7.15-7.08 (m, 8H), 3.72 (s, 3H), 3.71 (s, 3H), 3.29-3.12 (m, 3H), 2.77-2.53 (m, 8H), 2.23-2.18 (m, 4H), 2.05-1.99 (m, 1H), 1.92-1.86 (m, 4H), 1.61-1.44 (m, 4H);<sup>13</sup>C NMR (125 MHz; CDCl<sub>3</sub>): δ 177.0, 174.8, 139.9(2), 137.1, 136.0, 129.2, 129.1, 128.9, 128.7, 126.2, 126.1, 125.8, 125.6, 52.0, 51.7, 50.2, 49.0, 43.4, 42.2, 41.9(2), 35.2, 33.1, 29.9, 29.7 (grease), 29.3, 28.9, 27.5, 24.9, 21.4; IR (thin film): 2919, 2854, 1741, 1459, 1430, 1205, 906, 737 cm<sup>-1</sup>; HRMS (ESI+) *m/z* calcd. for C<sub>15</sub>H<sub>18</sub>LiO<sub>2</sub> [M+Li]<sup>+</sup>: 237.1467; found 237.1471.

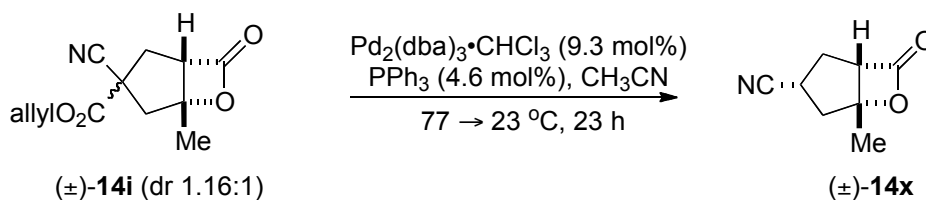

**5-Methyl-7-oxo-6-oxabicyclo[3.2.0]heptane-3-carbonitrile ((±)-14x).** To an oven-dried, 10 mL round-bottomed flask equipped with a magnetic stir bar was added Pd<sub>2</sub>(dba)<sub>3</sub>-CHCl<sub>3</sub> (47 mg, 0.045 mmol, 0.092 equiv.), triphenylphosphine (6 mg, 0.023

mmol, 0.047 equiv.), bicyclic- $\beta$ -lactone ( $\pm$ )-**14i** (115 mg, 0.489 mmol, 1.00 equiv., as a 1.16:1 mixture of diastereomers) along with CH<sub>3</sub>CN (6 mL). After addition, the flask was equipped with a reflux condenser and the reaction mixture was heated to 77 °C using an oil bath. With vigorous stirring the reaction remained at 77 °C for 6 h. After which the oil bath was removed and the reaction stirred at ambient temperature (23 °C) for 17 h. The mixture was then diluted with hexanes (4.0 mL), filtered through a short silica gel pad (~2 mL of silica gel), and rinsed with EtOAc (3 x 4 mL). The filtrate was concentrated by rotary evaporation and purified by flash column chromatography (gradient SiO<sub>2</sub>, 20  $\rightarrow$  100% EtOAc/hexanes) afforded a single diastereomer of bicyclic- $\beta$ -lactone ( $\pm$ )-**14x** (738 mg, 75% yield) a colorless solid: m.p. 101-103 °C (recrystallized from CDCl<sub>3</sub>); TLC (EtOAc:hexanes, 5:5 v/v): R<sub>f</sub> = 0.25; <sup>1</sup>H NMR (500 MHz; CDCl<sub>3</sub>):  $\delta$  3.64 (d, *J* = 8.3 Hz, 1H), 3.35 (t, *J* = 8.0 Hz, 1H), 2.66 (d, *J* = 15.1 Hz, 1H), 2.58 (d, *J* = 14.4 Hz, 1H), 2.20 (dt, *J* = 14.4, 8.1 Hz, 1H), 2.00 (dd, *J* = 15.1, 8.2 Hz, 1H), 1.73 (s, 3H); <sup>13</sup>C NMR (125 MHz; CDCl<sub>3</sub>): 168.8, 120.9, 86.9, 59.2, 40.0, 31.5, 28.2, 21.5; IR (thin film): 2360, 2339, 2235, 1807 cm<sup>-1</sup>; HRMS (ESI-) *m/z* calcd for C<sub>8</sub>H<sub>8</sub>NO<sub>2</sub> [M - H]<sup>-</sup>: 150.0555; found 150.0562.

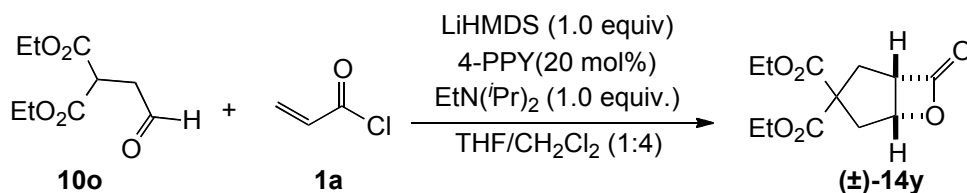

#### Diethyl 7-oxo-6-oxabicyclo[3.2.0]heptane-3,3-dicarboxylate (( $\pm$ )-**14y**).

Prepared according to the representative procedure using Michael donor **10o** (64.7 mg, 0.32 mmol, 1.00 equiv.), THF (1 mL), LiHMDS (320  $\mu$ L of a 1.0 M solution in THF, 0.32 mmol, 1.00 equiv.), CH<sub>2</sub>Cl<sub>2</sub> (4 mL), 4-PPY (80  $\mu$ L, 0.064 mmol of a 0.82 M solution in CH<sub>2</sub>Cl<sub>2</sub>, 0.20 equiv.), EtN(*i*Pr)<sub>2</sub> (60  $\mu$ L, 0.32 mmol, 1.00 equiv.), and acryloyl chloride (**1a**, 261  $\mu$ L of a 1.612 M solution in CH<sub>2</sub>Cl<sub>2</sub>, 0.42 mmol, 1.30 equiv.). After addition of acryloyl chloride, the reaction was allowed to react for 12 h at ambient temperature (23 °C) as opposed to the standard 6 h. Purification by flash column chromatography (SiO<sub>2</sub>, 5  $\rightarrow$  30% EtOAc/hexanes) afforded bicyclic  $\beta$ -lactone ( $\pm$ )-**14y** as a colorless oil (49 mg, 60%): TLC (EtOAc:hexanes, 3:9 v/v): R<sub>f</sub> = 0.38; <sup>1</sup>H



NMR (500 MHz; CDCl<sub>3</sub>):  $\delta$  5.10 (t,  $J$  = 4.1 Hz, 1H), 4.33-4.23 (m, 4H), 4.04 (dd,  $J$  = 9.1, 3.9 Hz, 1H), 3.23 (d,  $J$  = 14.2 Hz, 1H), 3.08 (d,  $J$  = 15.6 Hz, 1H), 2.52 (dd,  $J$  = 16.2, 4.8 Hz, 1H), 2.15 (dd,  $J$  = 14.4, 9.1 Hz, 1H), 1.35-1.30 (m, 6H); <sup>13</sup>C NMR (125 MHz; CDCl<sub>3</sub>):  $\delta$  170.5, 170.1, 169.2, 62.5, 60.1, 56.1, 45.1, 39.1, 34.1, 29.8, 14.1, 14.0; IR (thin film): 2925, 2854, 1838, 1735 cm<sup>-1</sup>; HRMS (ESI+)  $m/z$  calcd. for C<sub>12</sub>H<sub>17</sub>O<sub>6</sub> [M+H]<sup>+</sup>: 257.1025; found 257.1034.

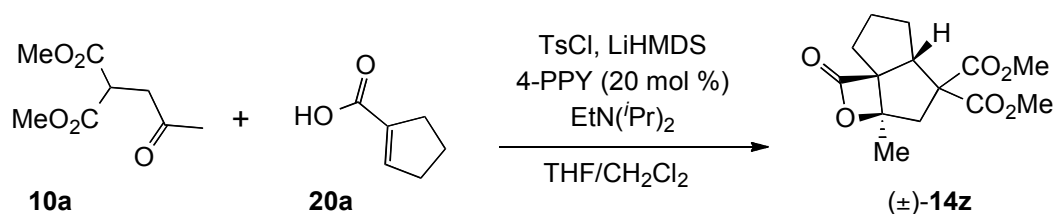

**Dimethyl 2a-methyl-1-oxohexahydro-pentaleno[1,6a-b]oxete-4,4(1H)-dicarboxylate ((±)-14z).** To an oven-dried, 10 mL round-bottomed flask equipped with a magnetic stir bar were added cyclopent-1-enecarboxylic acid (**20a**, 58.50 mg, 0.52 mmol, 1.63 equiv.) TsCl (103 mg, 0.54 mmol, 1.69 equiv.), EtN(<sup>i</sup>Pr)<sub>2</sub> (97  $\mu$ L, 0.55 mmol, 1.72 equiv.) and CH<sub>2</sub>Cl<sub>2</sub> (3 mL). This mixture was allowed to react at ambient temperature (23 °C) for 30 min. To an oven-dried, 25 mL round-bottomed flask equipped with a magnetic stir bar was added Michael donor **10a** (61.40 mg, 0.32 mmol, 1.00 equiv.) along with THF (1 mL) and the mixture was cooled to -78 °C. With vigorous stirring, LiHMDS (320  $\mu$ L of a 1.0 M solution in THF, 0.32 mmol, 1.00 equiv.) was added dropwise via microliter syringe. After complete addition, the reaction was stirred for 10 min at -78 °C and then warmed to 0 °C by switching the dry ice/acetone bath to an ice/water bath. Stirring was continued for an additional 10 min at this temperature, and then CH<sub>2</sub>Cl<sub>2</sub> (3 mL), 4-PPY (80  $\mu$ L of a 0.82 M solution in CH<sub>2</sub>Cl<sub>2</sub>, 0.064 mmol, 0.20 equiv.) and EtN(<sup>i</sup>Pr)<sub>2</sub> (60  $\mu$ L, 0.32 mmol, 1.00 equiv.) were added via microliter syringe, sequentially. The reaction was allowed to stir for an additional 10 min at 0 °C the previous solution of **18a**, TsCl, EtN(<sup>i</sup>Pr)<sub>2</sub>, in CH<sub>2</sub>Cl<sub>2</sub> was added by syringe pump over 2 h at 0 °C. After the addition was complete, the reaction was allowed to react for 16 h at room temperature (23 °C). The reaction was then cooled to 0 °C and silica gel (2 g) was added and stirred at 0 °C for 10 min. Then the ice/water bath was removed and the reaction stirred at ambient temperature (23 °C) for

20 min. The mixture was then diluted with hexanes (4.0 mL), filtered through a short silica gel pad (~2 mL of silica gel), and rinsed with EtOAc (3 x 4 mL). The filtrate was then concentrated by rotary evaporation, analyzed by  $^1\text{H}$  NMR. Purification by flash column chromatography ( $\text{SiO}_2$ , 10  $\rightarrow$  40% EtOAc/hexanes) afforded a single diastereomer of bicyclic- $\beta$ -lactone ( $\pm$ )-**14z** (59.4 mg, 66%) as a white solid: TLC (EtOAc:hexanes, 3:7 v/v):  $R_f$  = 0.14;  $^1\text{H}$  NMR (500 MHz;  $\text{CDCl}_3$ ):  $\delta$  3.78 (s, 3H), 3.74 (s, 3H), 3.62 (dd,  $J$  = 11.6, 7.1 Hz, 1H), 2.87 (d,  $J$  = 15.8 Hz, 1H), 2.64 (d,  $J$  = 15.8 Hz, 1H), 2.22 (m, 1H), 1.88-1.68 (m, 4H), 1.53 (s, 3H), 1.14 (m,  $J$  = 7.4 Hz, 1H);  $^{13}\text{C}$  NMR (125 MHz;  $\text{CDCl}_3$ ):  $\delta$  172.7, 171.1, 169.5, 89.7, 72.9, 61.5, 53.8, 53.4, 53.2, 41.8, 28.9, 26.3, 25.8, 20.1; IR (thin film): 2958, 2928, 2857, 1833, 1738  $\text{cm}^{-1}$ ; HRMS (ESI+)  $m/z$  calcd. for  $\text{C}_{14}\text{H}_{20}\text{O}_6$   $[\text{M}+\text{H}]^+$ : 283.1182; found 283.1168.

#### Representative procedure for Michael-Michael-aldol-lactonization:

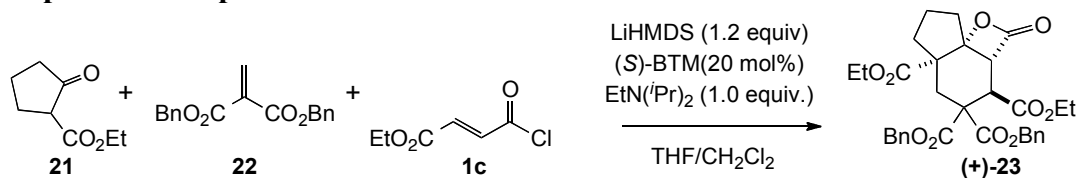

**(2a*R*,3*R*,5a*S*,8a*R*)-4,4-Dibenzyl 3,5a-diethyl 2-oxohexahydro-2*H*-indeno[3a,4-*b*]oxete-3,4,4,5a(5*H*)-tetracarboxylate ((+)-**23**).** An oven-dried, 100-mL round-bottomed flask was charged with a solution of LiHMDS (1.80 mL of 1.0 M solution in THF, 1.80 mmol, 1.2 equiv) in THF (2.5 mL) at -78 °C, followed by slow addition of a solution of cyclopentanone **21** (234 mg, 1.50 mmol, 1.0 equiv) in THF (2.5 mL). The resulting mixture was warmed to -20 °C and stirred for 30 min, then a solution of diester **22** (1.80 mL of 1.0 M solution in benzene, 1.80 mmol, 1.2 equiv) in THF (2.5 mL) was added dropwise. After 1 h at -20 °C, a solution of (*S*)-BTM (75.7 mg, 0.30 mmol, 20 mol%) and EtN(*i*Pr)<sub>2</sub> (194 mg, 1.50 mmol, 1.0 equiv) in CH<sub>2</sub>Cl<sub>2</sub> (2.5 mL) was added. Then a solution of acid chloride **1c** (366 mg, 2.25 mmol, 1.5 equiv) in CH<sub>2</sub>Cl<sub>2</sub> (5.0 mL) was added at -20 °C over 5 h by a syringe pump. The reaction temperature was maintained at -20 °C throughout the addition of **1c** and then the reaction was stirred at this temperature for 15 h. Upon completion (as judged by TLC), the reaction was concentrated by rotary evaporation and the product was purified by an

automated flash chromatography system (gradient of EtOAc/hexanes) to afford a single diastereomer of tricyclic- $\beta$ -lactone **(+)-23** (457 mg, 53% yield) as a yellow, viscous liquid: TLC (EtOAc:hexanes, 2:8 v/v):  $R_f = 0.40$ ;  $[\alpha]_D^{17} = +3.49$  ( $c = 1.0$ ,  $\text{CHCl}_3$ ). Enantiomeric excess was determined by HPLC analysis in comparison with authentic racemic material using a Chiracel AS-H column: hexanes:*i*PrOH = 90:10, flow rate 1.0 mL/min,  $\lambda = 210$  nm:  $t_{\text{major}} = 12.3$  min,  $t_{\text{minor}} = 19.1$  min; 93% ee. Absolute stereochemistry was assigned by derivatization below.  $^1\text{H}$  NMR (500 MHz,  $\text{CDCl}_3$ ):  $\delta$  7.37-7.28 (m, 10H), 5.21-5.13 (m, 4H), 4.18-4.02 (m, 5H), 3.82 (d,  $J = 9.6$  Hz, 1H), 3.08 (d,  $J = 15.1$  Hz, 1H), 2.69-2.64 (m, 1H), 2.43 (d,  $J = 15.1$  Hz, 1H), 2.21-2.017 (m, 1H), 1.81-1.56 (m, 4H), 1.23-1.16 (m, 6H);  $^{13}\text{C}$  NMR (125 MHz,  $\text{CDCl}_3$ ):  $\delta$  172.5, 170.3, 170.2, 169.3, 168.1, 135.0, 134.3, 129.1 (2), 128.9, 128.7 (2), 128.6 (2), 128.4, 128.2 (2), 85.7, 68.3, 68.1, 61.91, 61.90, 55.9, 52.7, 52.2, 43.3, 39.7, 39.3, 39.2, 23.3, 13.9, 13.8; IR (thin film): 2978, 1836, 1737, 1453, 1370, 1269, 1027  $\text{cm}^{-1}$ ; HRMS (ESI+)  $m/z$  calcd for  $\text{C}_{32}\text{H}_{35}\text{O}_{10}$   $[\text{M}+\text{H}]^+$ : 579.2230, found: 579.2251.

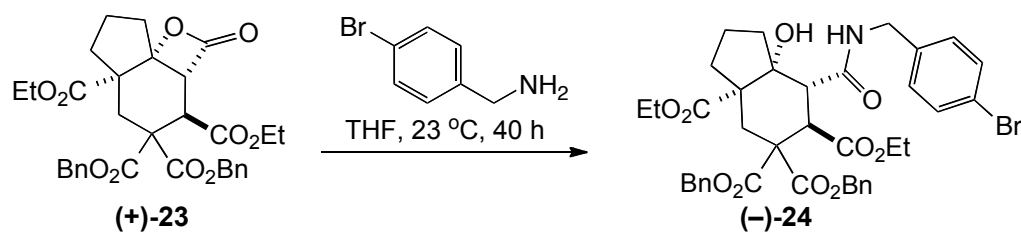

**(3a*S*,6*R*,7*R*,7a*R*)-5,5-dibenzyl 3a,6-diethyl 7-(benzylcarbamoyl)-7a-hydroxyhexahydro-1*H*-indene-3a,5,5,6(6*H*)-tetracarboxylate ((-)-24)**. Into an oven-dried, 25-mL round-bottomed flask containing a solution of  $\beta$ -lactone **(+)-23** (400 mg, 0.69 mmol, 1.0 equiv) in THF (7 mL), was added dropwise *p*-bromobenzylamine (0.35 mL, 2.8 mmol, 4.0 equiv). The reaction was allowed to stir at ambient temperature (23  $^\circ\text{C}$ ) for 40 h. Upon completion (as judged by TLC), the reaction was concentrated by rotary evaporation and purified by an automated flash chromatography system (gradient of EtOAc/hexanes) to afford bicyclic amide **(-)-24** (300 mg, 57% yield) as a colorless solid: TLC (EtOAc:hexanes, 2:8 v/v):  $R_f = 0.35$ ;  $[\alpha]_D^{20} = -24.15$  ( $c = 1.00$ ,  $\text{CHCl}_3$ );  $^1\text{H}$  NMR (500 MHz,  $\text{C}_6\text{D}_6$ ):  $\delta$  7.21 (d,  $J = 8.3$  Hz, 2H), 7.16-7.08 (m, 5H), 7.08-6.96 (m, 6H), 6.93 (d,  $J = 8.3$  Hz, 2H), 6.61 (t,  $J = 6.0$  Hz, 1H), 5.74 (s, 1H), 5.07-

5.01 (m, 4H), 4.36 (d,  $J = 11.8$  Hz, 1H), 4.22 (dd,  $J = 15.0, 6.0$  Hz, 1H), 4.08 (dd,  $J = 15.0, 6.0$  Hz, 1H), 3.98-3.88 (m, 2H), 3.84-3.71 (m, 2H), 3.45 (d,  $J = 14.9$  Hz, 1H), 2.91 (d,  $J = 11.8$  Hz, 1H), 2.68 (d,  $J = 14.9$  Hz, 1H), 2.17-2.08 (m, 2H), 1.94-1.84 (m, 2H), 1.49-1.39 (m, 2H), 0.92 (t,  $J = 7.1$  Hz, 3H), 0.83 (t,  $J = 7.1$  Hz, 3H);  $^{13}\text{C}$  NMR (125 MHz;  $\text{C}_6\text{D}_6$ ):  $\delta$  174.9, 172.9, 172.2, 170.7, 170.6, 137.8, 135.6, 135.1, 131.4 (2), 129.6 (2), 128.35 (2), 128.28 (2), 128.23 (2), 128.13, 128.07 (2), 127.95, 120.9, 80.8, 67.55, 67.46, 60.85, 60.83, 57.1, 54.7, 48.7, 44.9, 42.6, 36.9, 34.1, 33.6, 20.7, 13.7, 13.5; IR (thin film): 3357, 2959, 1741, 1645, 1547, 1489, 1261  $\text{cm}^{-1}$ ; HRMS (ESI+)  $m/z$  calcd for  $\text{C}_{39}\text{H}_{43}\text{BrNO}_{10}$   $[\text{M}+\text{H}]^+$ : 764.2065; found 764.2055.

### NCMAL Optimization Studies for $\beta$ -Substituted, Unsaturated Acid Chlorides

**Table S1.** Optimization of the tandem Michael-aldol- $\beta$ -lactonization process for  $\alpha$ - and  $\beta$ -substituted acid chlorides.

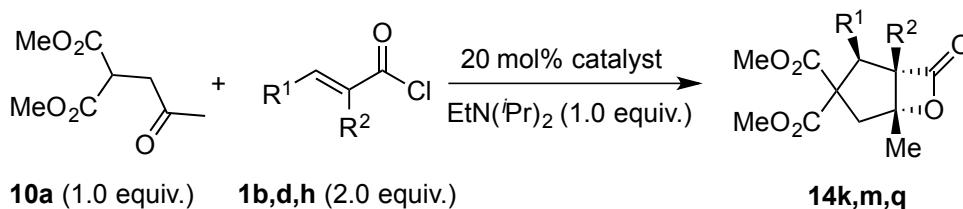

| entry | catalyst | <b>1a</b> | acid chloride<br>addn. time | yield % | ee |
|-------|----------|-----------|-----------------------------|---------|----|
| 1     | (S)-HBTM |           | 4 min                       | 78      | 30 |
| 2     | (S)-HBTM |           | 2 h                         | 80      | 99 |
| 3     | none     | <b>1h</b> | --                          | 80      | 0  |
| 4     | (S)-HBTM |           | 4 min                       | 60      | 80 |
| 5     | (S)-HBTM | <b>1b</b> | 2 h                         | 80      | 93 |
| 6     | (S)-HBTM |           | 4 min                       | 72      | 80 |
| 7     | (S)-HBTM | <b>1d</b> | 2 h                         | 80      | 99 |

When the optimized racemic conditions were initially applied to both  $\alpha$ -substituted and  $\beta$ -substituted unsaturated acid chlorides, a significant decrease in enantioselectivity was observed, however the yield remained relatively constant. For instance, adding  $\alpha$ -methacrolyl chloride (**1h**) with the usual 4 minute addition time gave cyclopentane **14q** in 30% ee in 78% yield (Table S1, entry 1). Likewise,  $\beta$ -methacrolyl chloride gave reduced enantioselectivity (80% ee) in 60% yield of cyclopentane **14k** (Table S1, entry 4) and  $\beta$ -phenyl acryloyl chloride (Table S1, entry 6) led to cyclopentane **14m** in 72% yield and 80% ee. These results are suggestive of a potential background racemic pathway that is in operation with substituted acid chlorides likely due to slower formation of the chiral unsaturated acylammonium intermediate in these cases. To explore this possibility, the same reaction conditions were applied without a nucleophilic catalyst (Table S1, entry 1) and this indeed delivered racemic cyclopentane **14q** in 80% yield. One possible mechanism for this racemic background pathway is a direct Michael addition of the malonate anion to the unsaturated acid chloride as shown in the Scheme below.

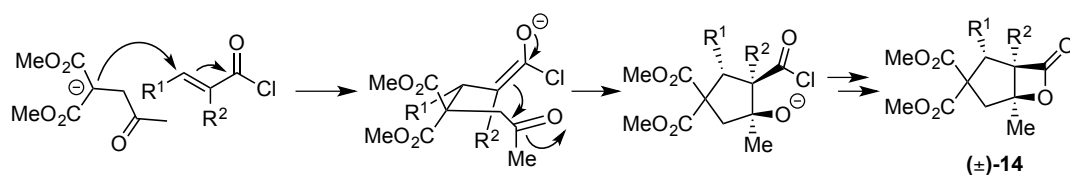

Building on this hypothesis, acid chloride **1h** was added over an extended period of time (2 h, syringe pump) and this led to a dramatic improvement in the enantioselectivity from 30 to >99%. This trend also held for acid chlorides **1b** and **1d** leading to increased enantioselectivity achievable with longer addition times of the unsaturated acid chlorides (Table S1, entries 5 and 7).

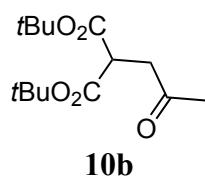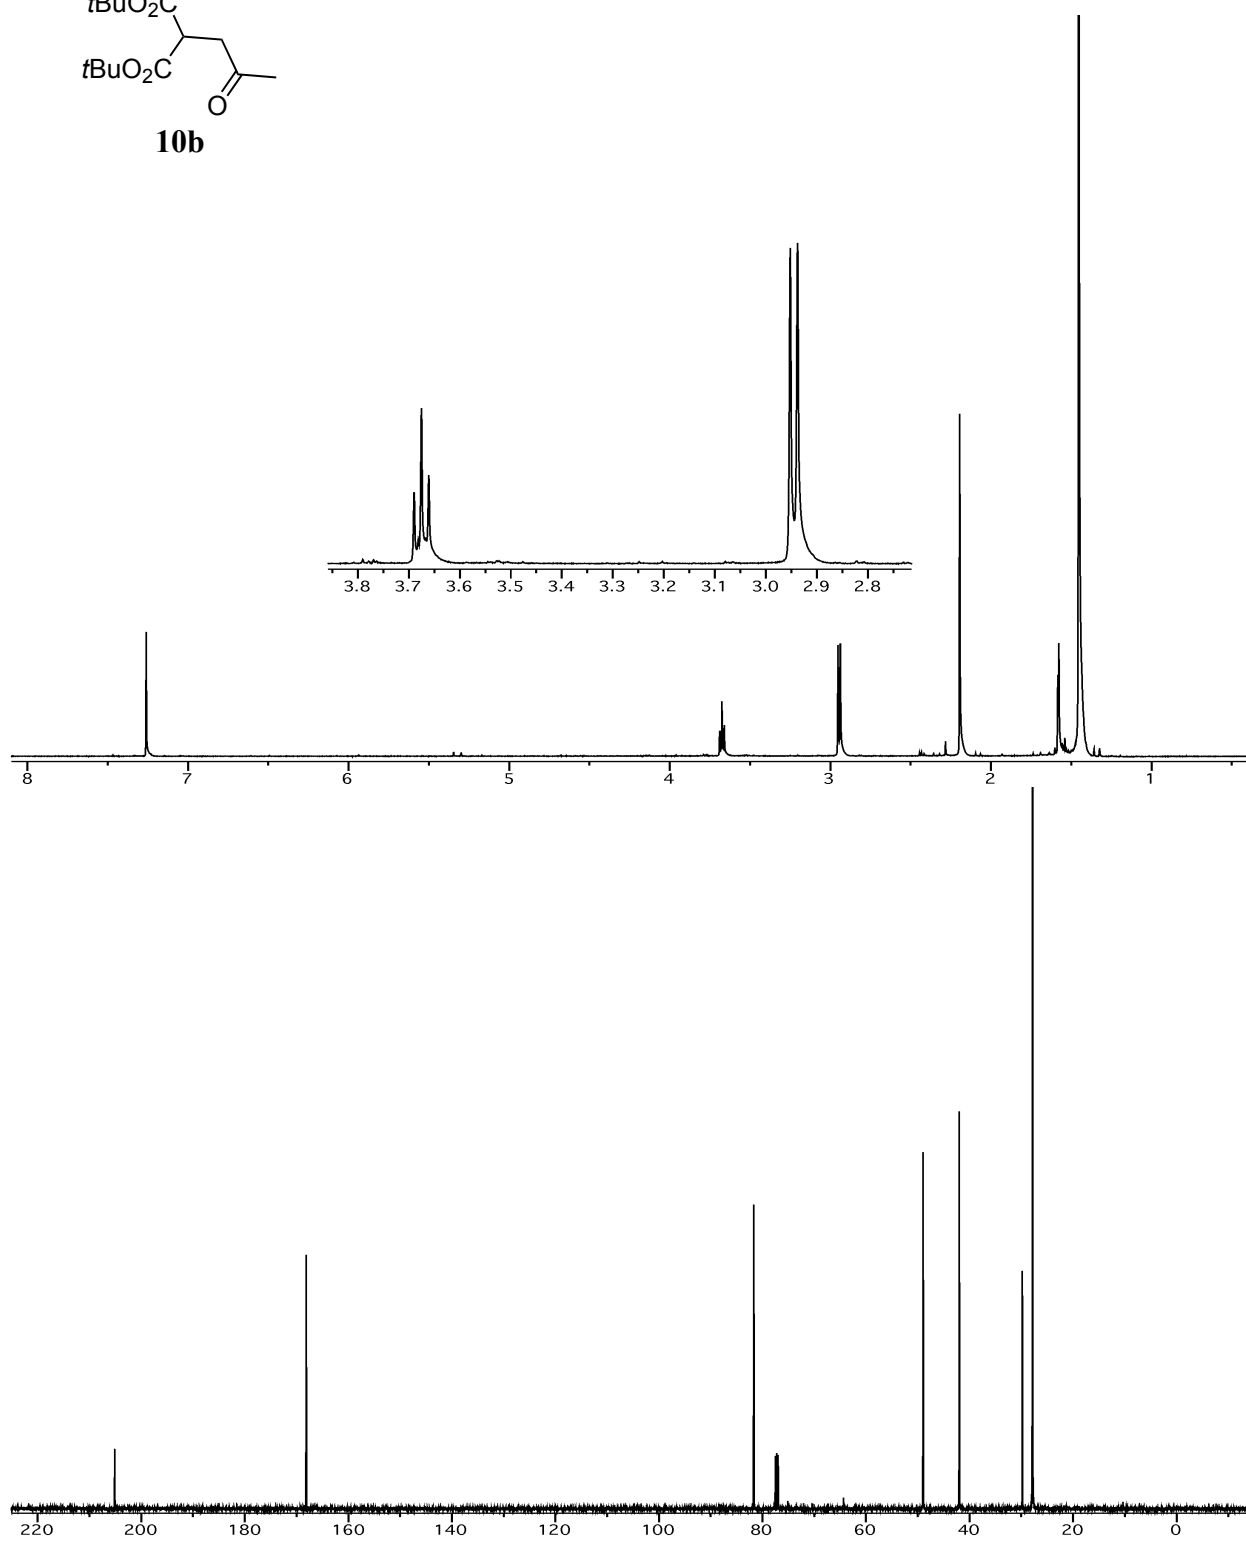

<sup>1</sup>H (500 MHz) and <sup>13</sup>C NMR (125 MHz) spectra of substrate **10b** in CDCl<sub>3</sub>

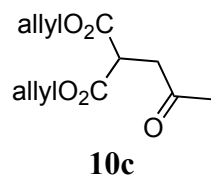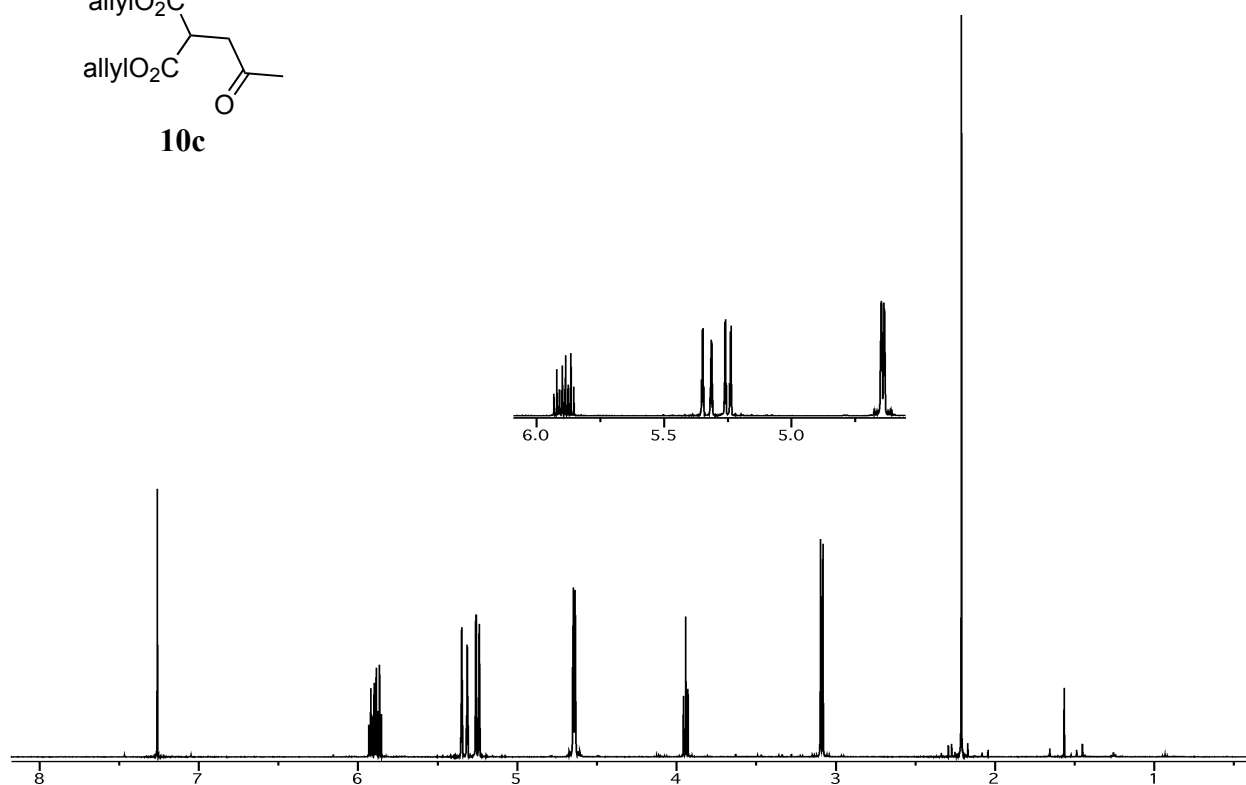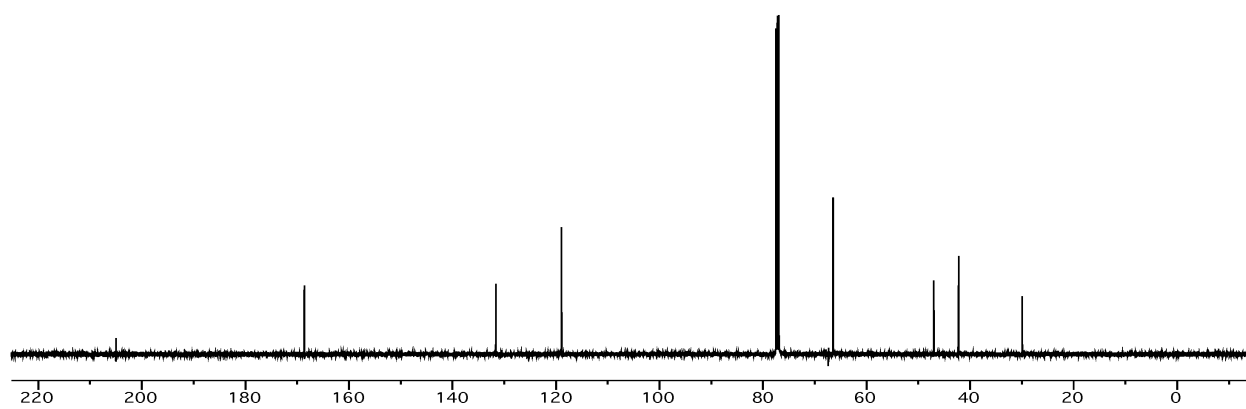

$^1\text{H}$  (500 MHz) and  $^{13}\text{C}$  NMR (125 MHz) spectra of substrate **10c** in  $\text{CDCl}_3$

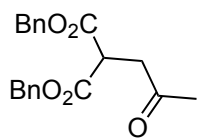**10d**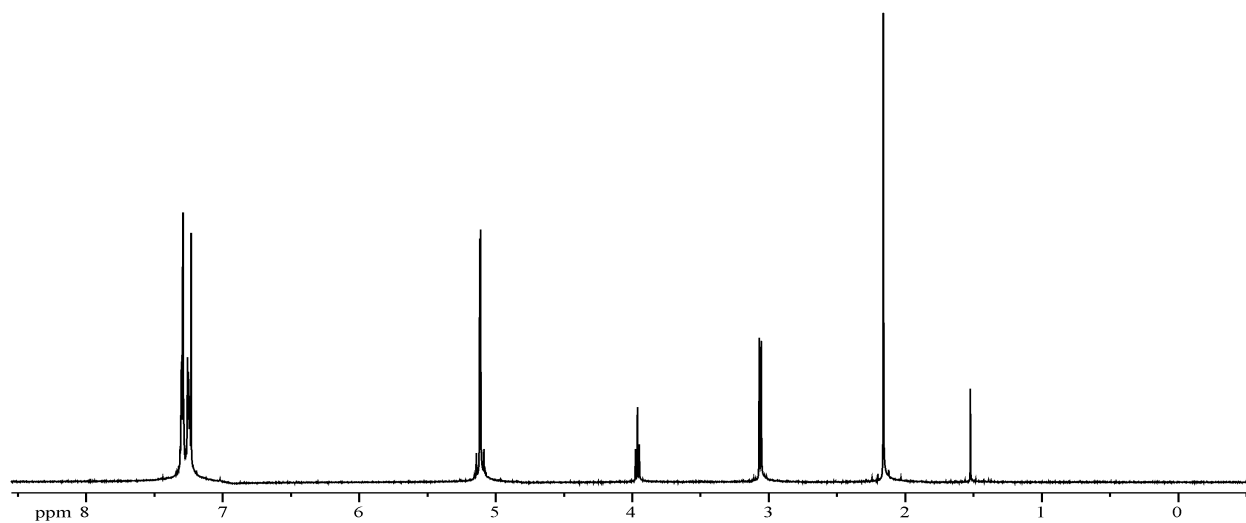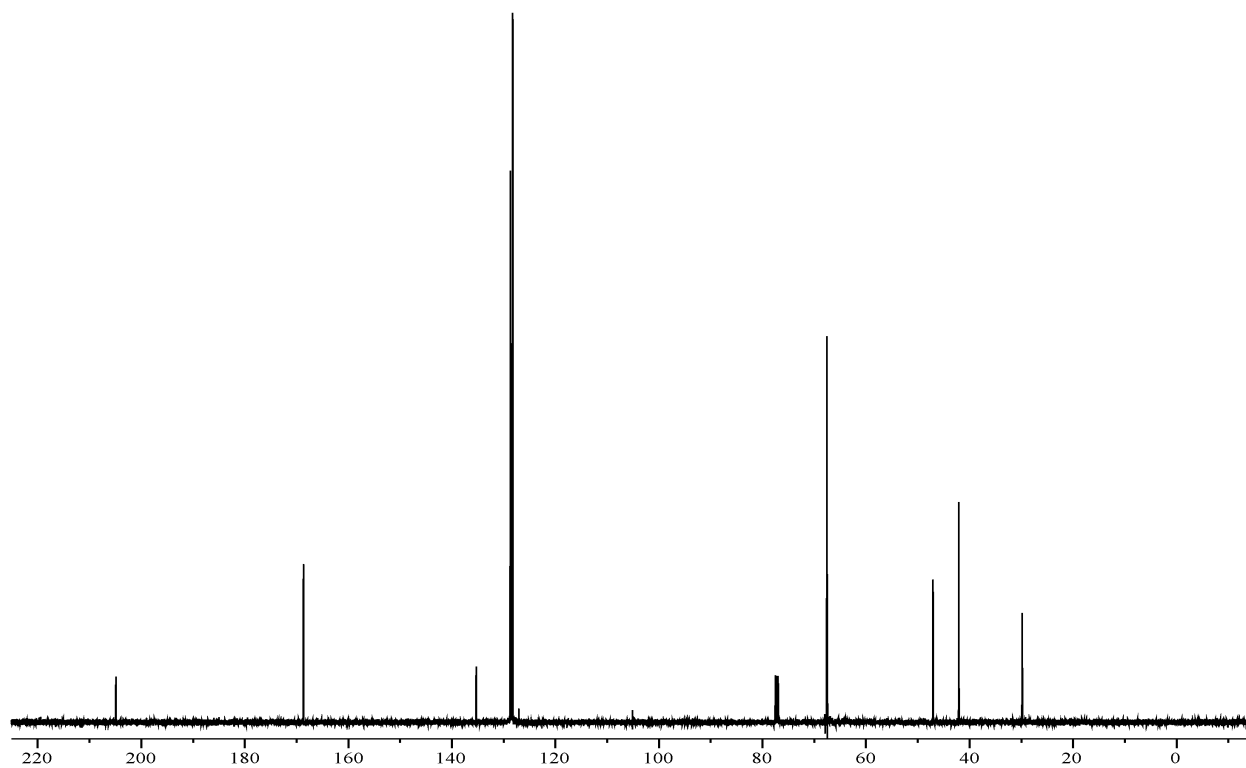 $^1\text{H}$  (500 MHz) and  $^{13}\text{C}$  NMR (125 MHz) spectra of substrate **10d** in  $\text{CDCl}_3$



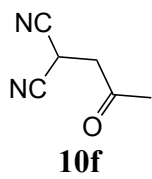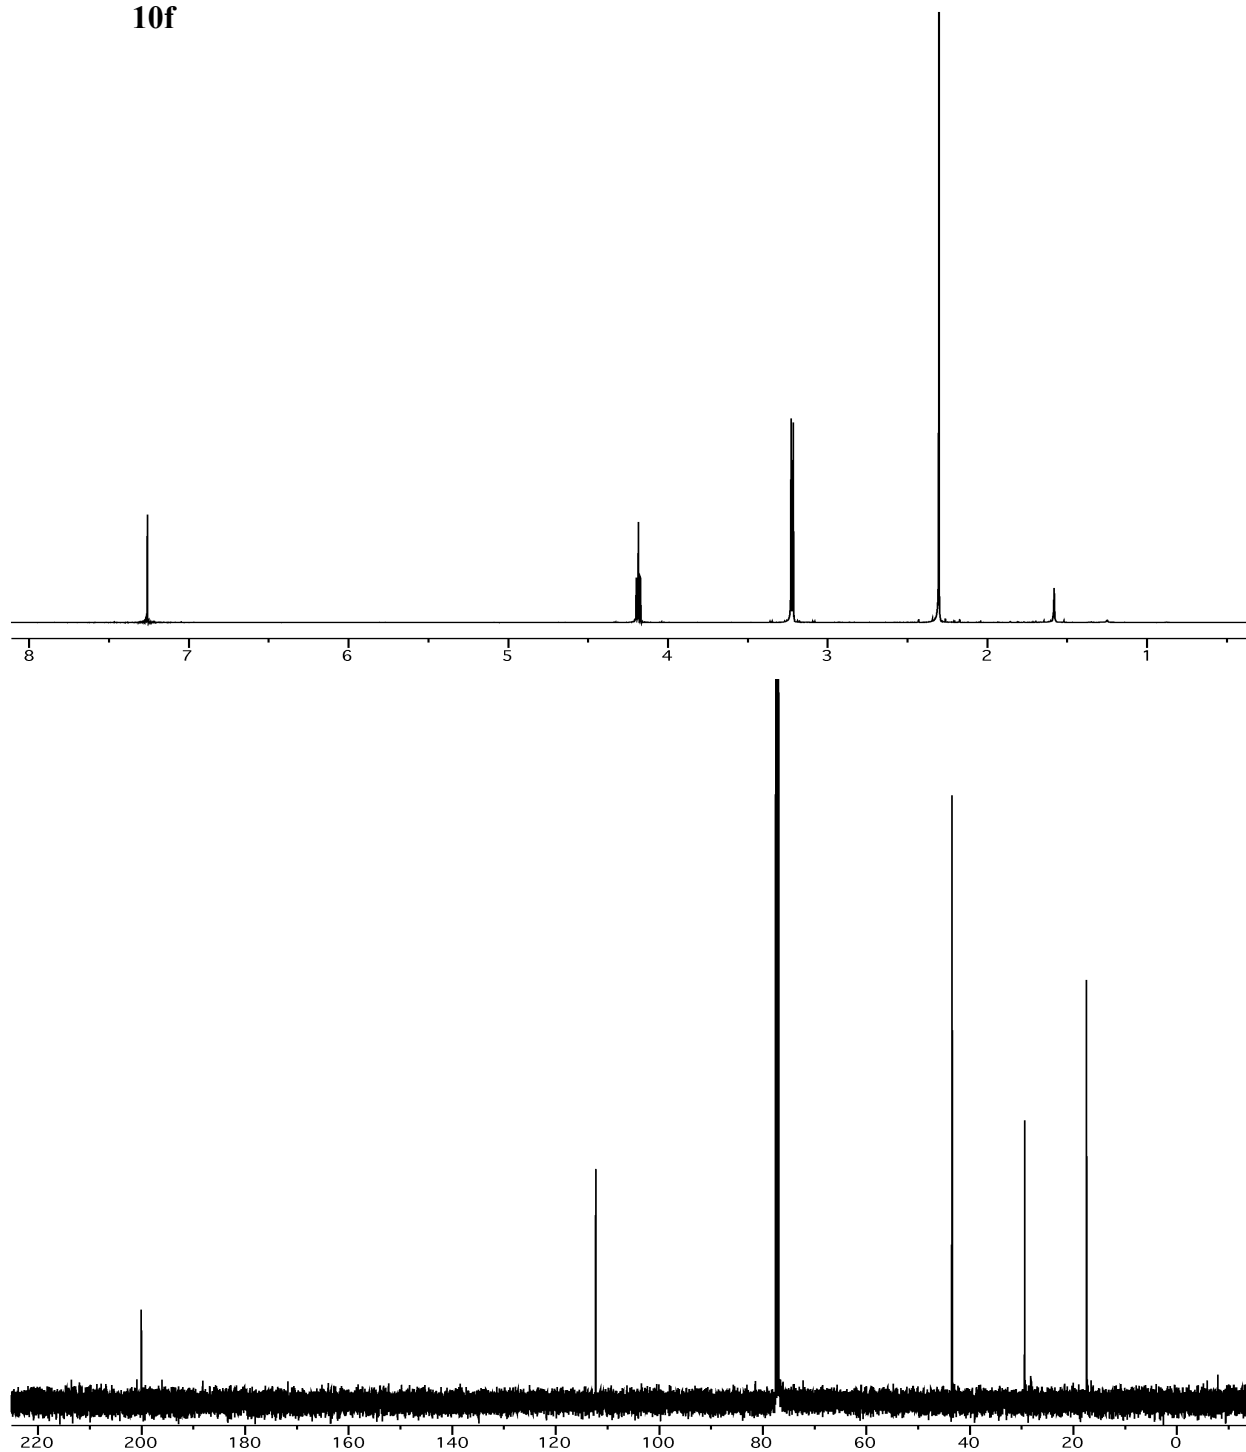

$^1\text{H}$  (500 MHz) and  $^{13}\text{C}$  NMR (125 MHz) spectra of substrate **10f** in  $\text{CDCl}_3$

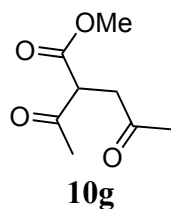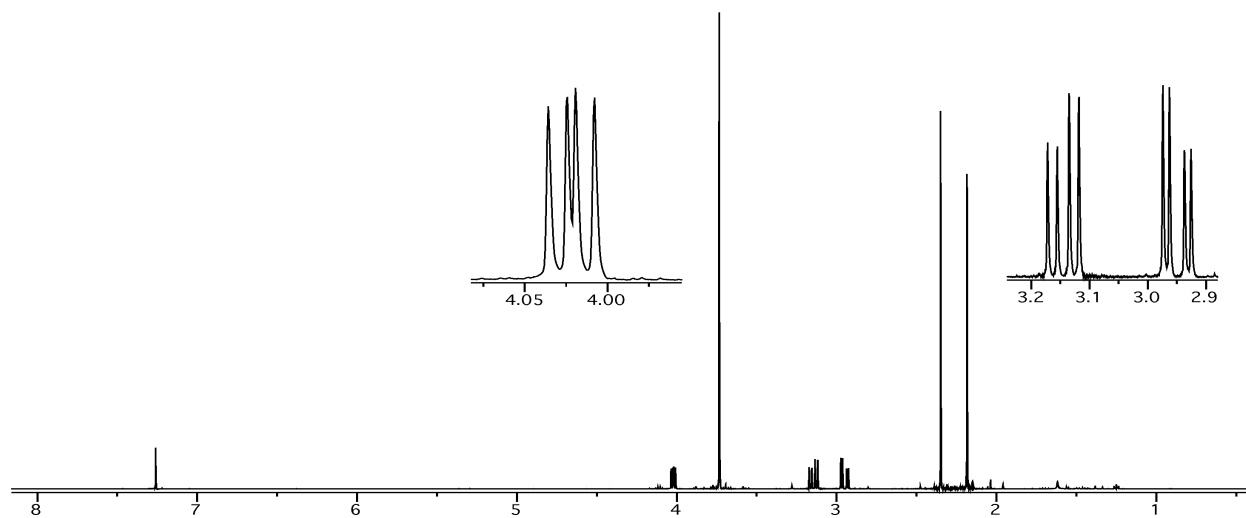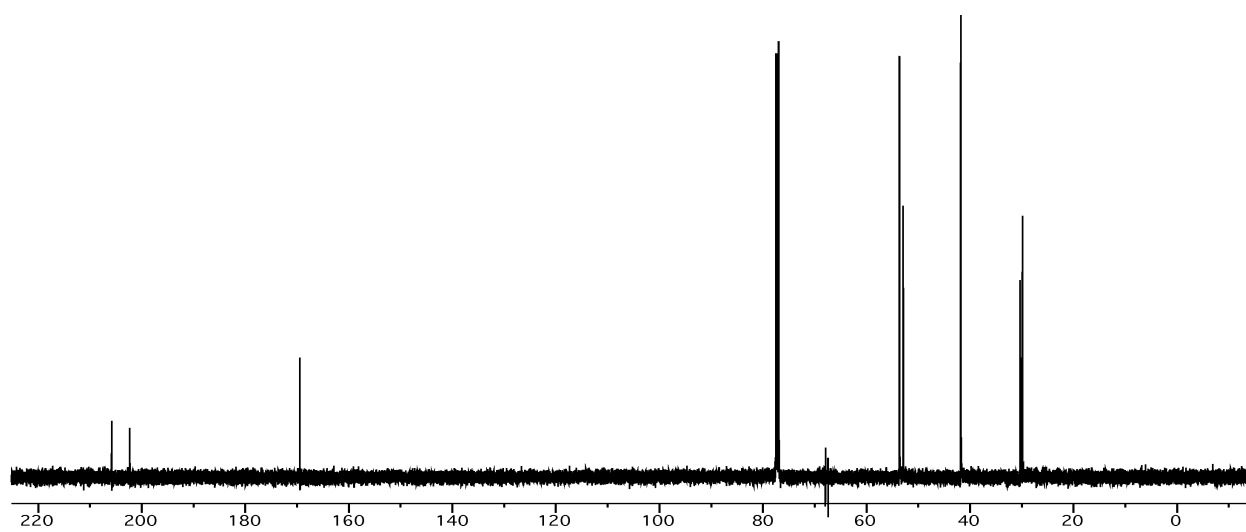

$^1\text{H}$  (500 MHz) and  $^{13}\text{C}$  NMR (125 MHz) spectra of substrate **10g** in  $\text{CDCl}_3$

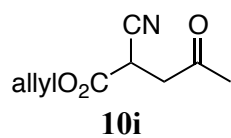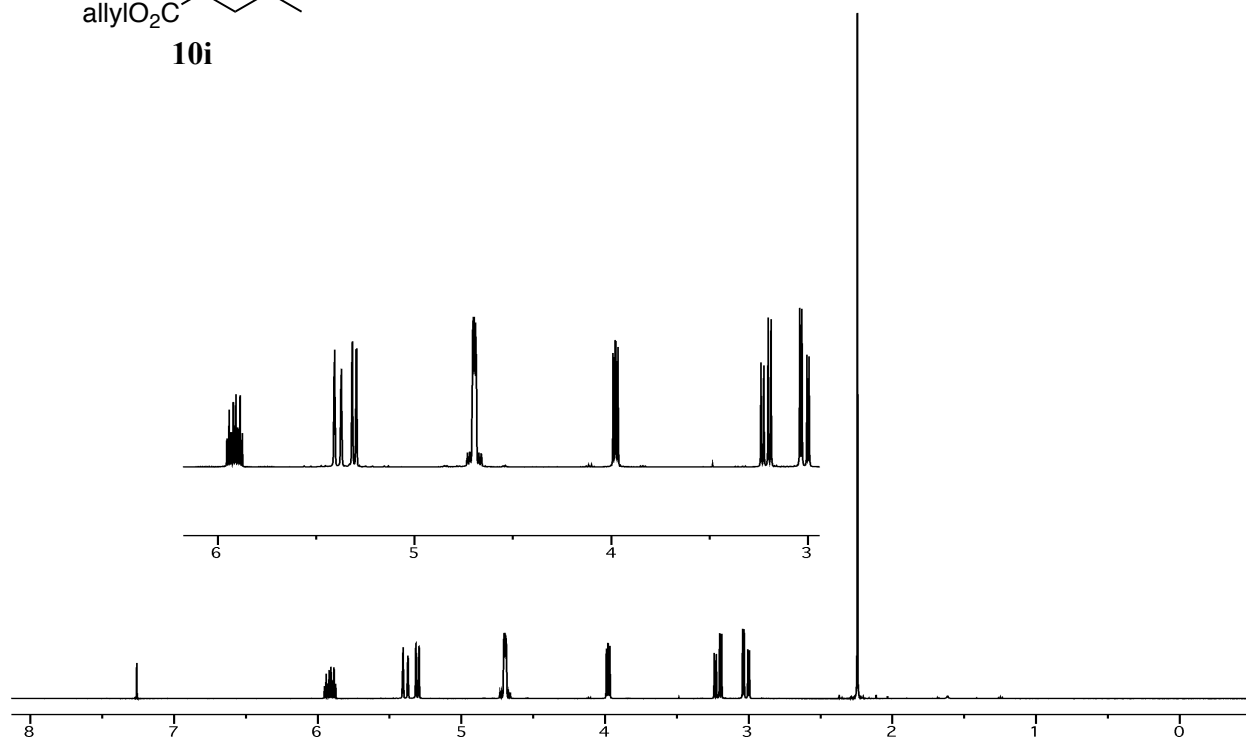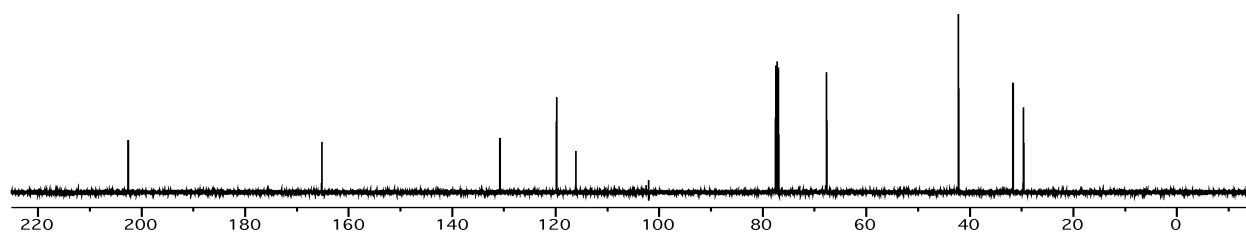

$^1\text{H}$  (500 MHz) and  $^{13}\text{C}$  NMR (125 MHz) spectra of substrate **10i** in  $\text{CDCl}_3$

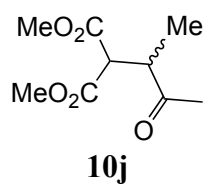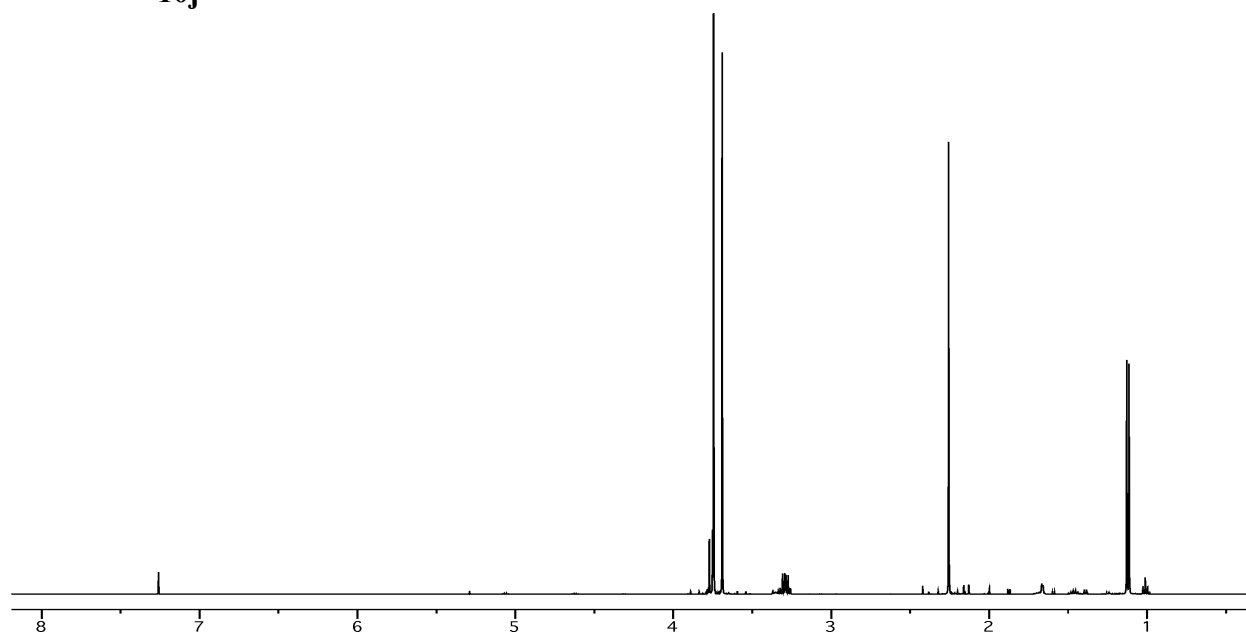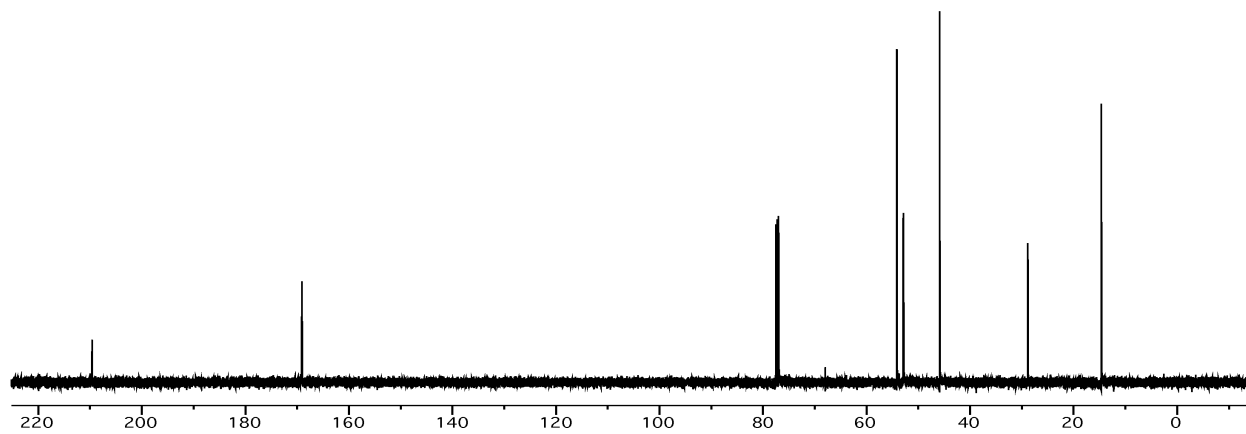

<sup>1</sup>H (500 MHz) and <sup>13</sup>C NMR (125 MHz) spectra of substrate **10j** in CDCl<sub>3</sub>

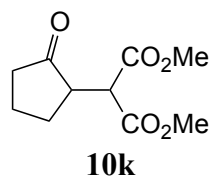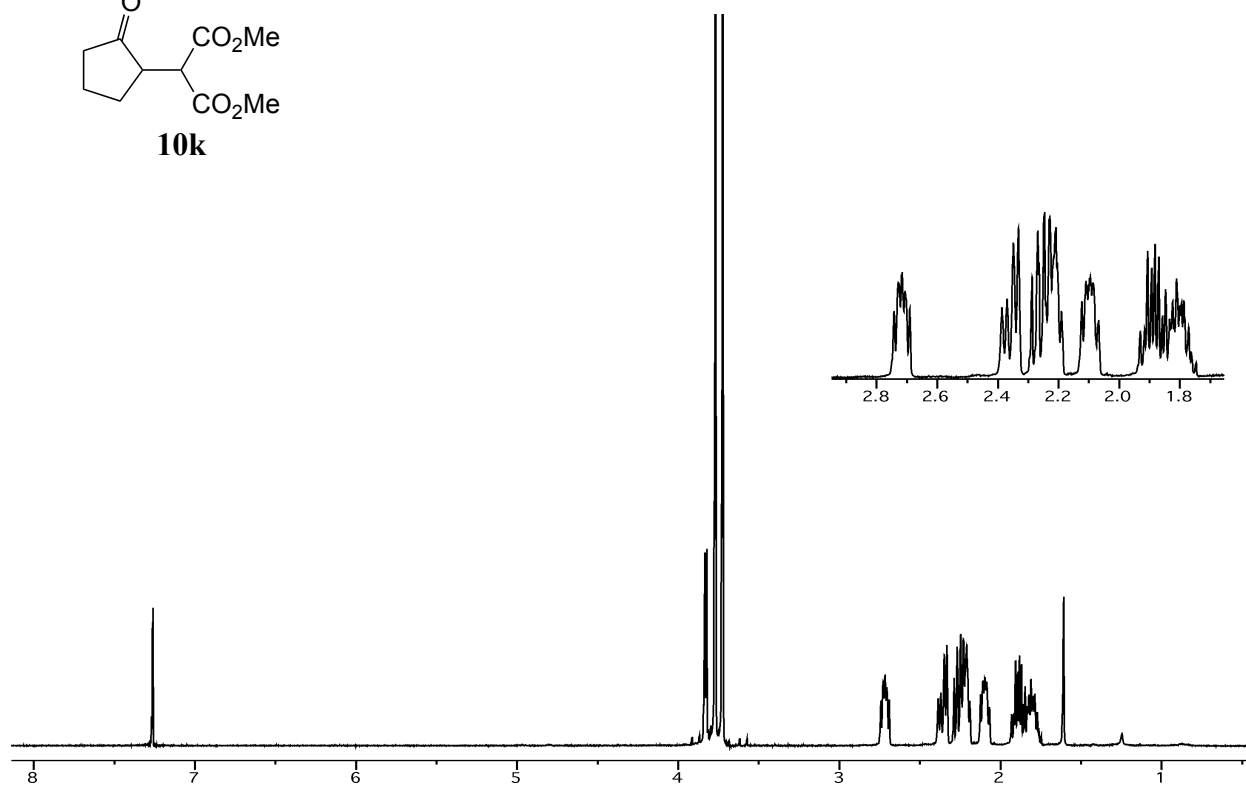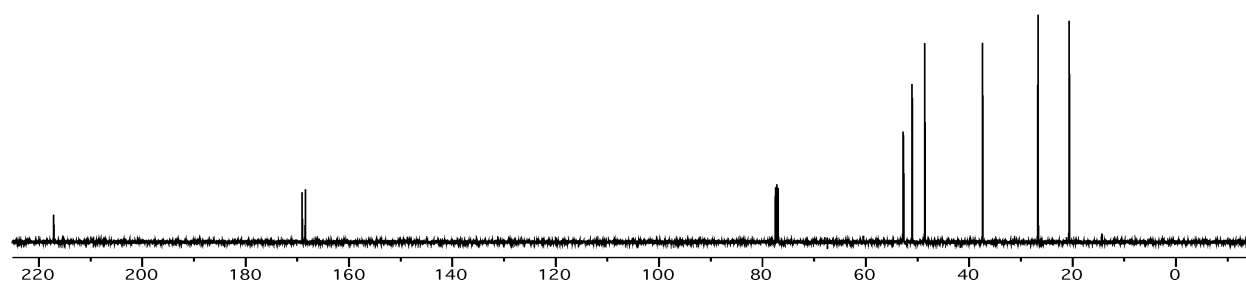

<sup>1</sup>H (500 MHz) and <sup>13</sup>C NMR (125 MHz) spectra of substrate **10k** in CDCl<sub>3</sub>

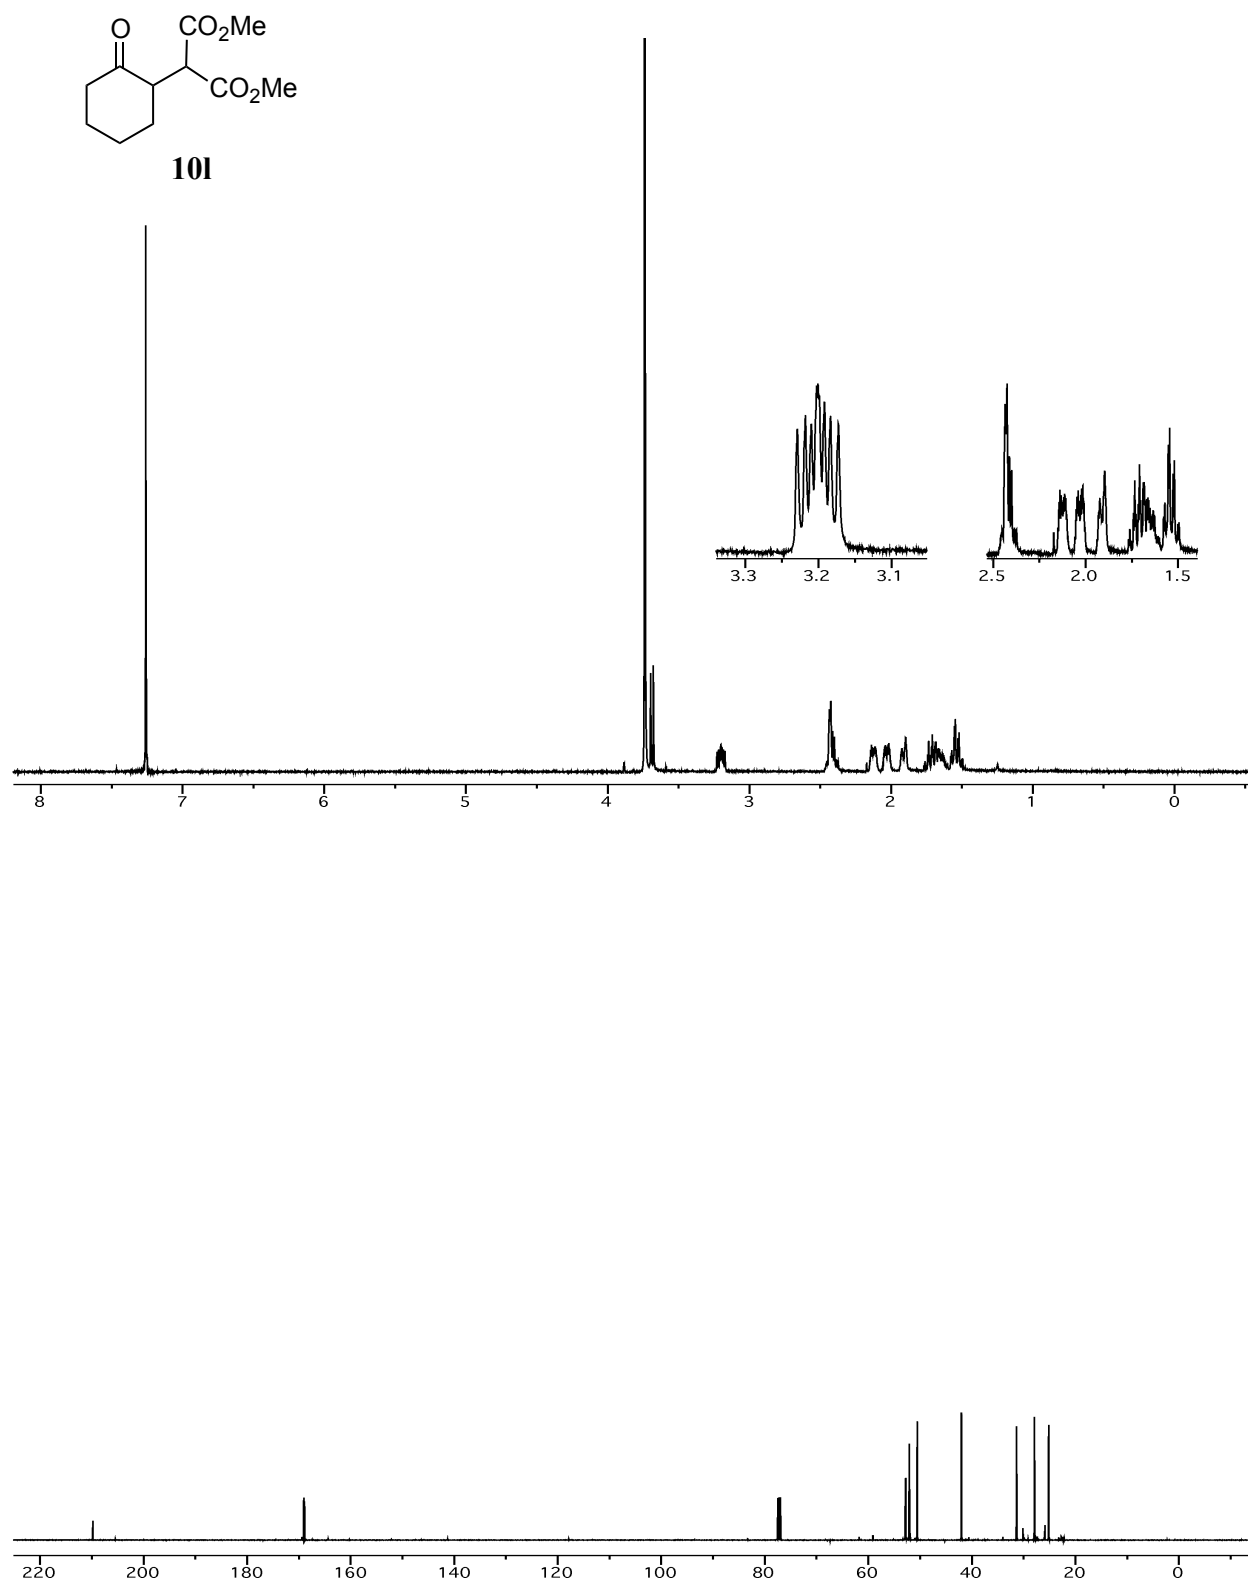

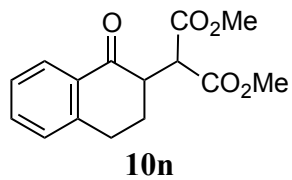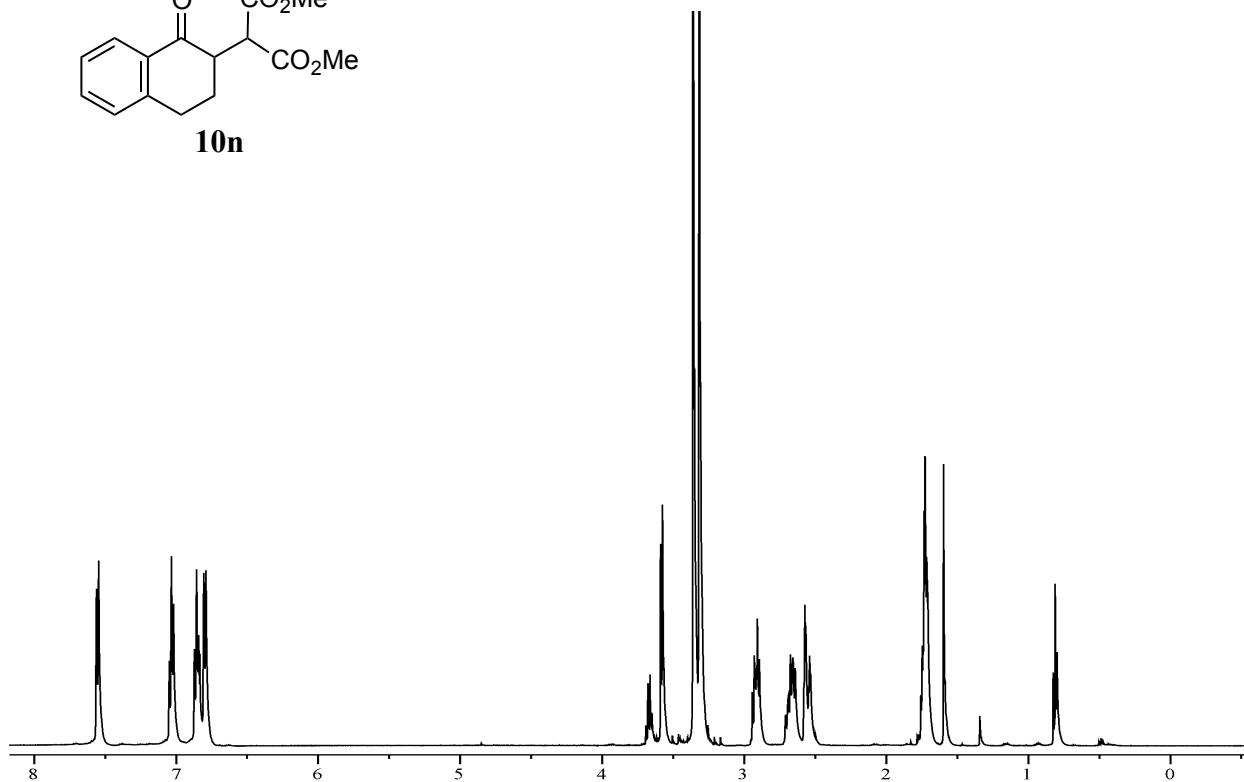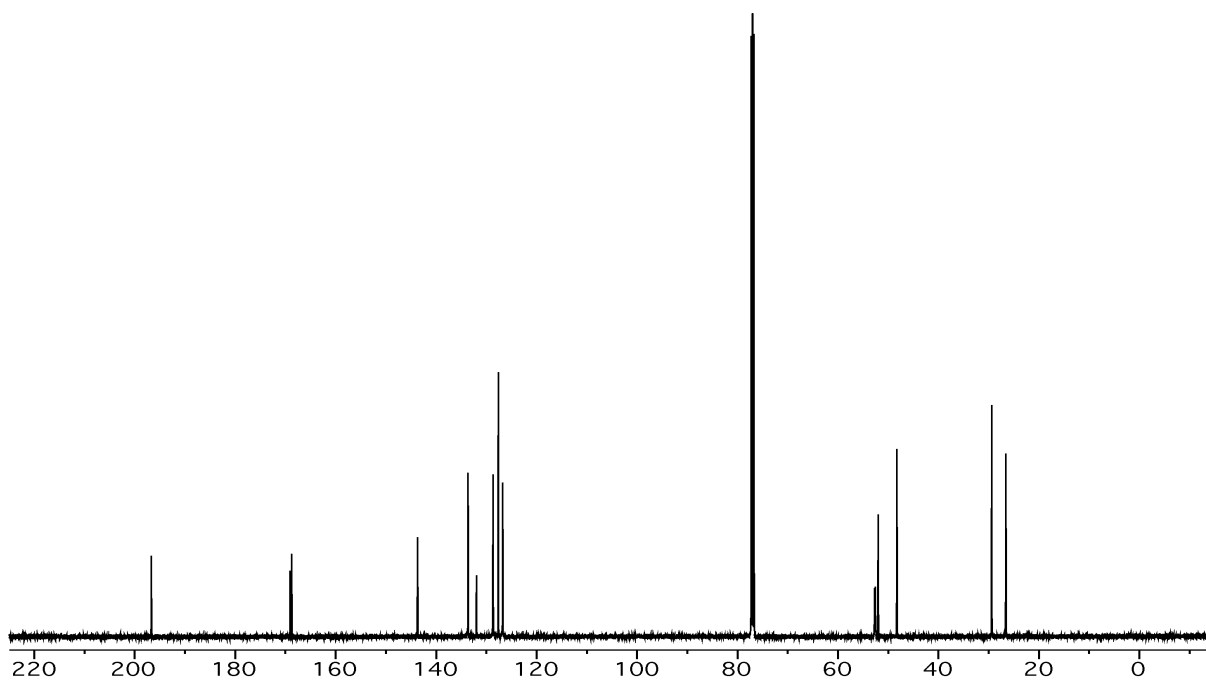

$^1\text{H}$  (500 MHz) and  $^{13}\text{C}$  NMR (125 MHz) spectra of substrate **10n** in  $\text{CDCl}_3$

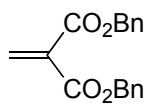**22**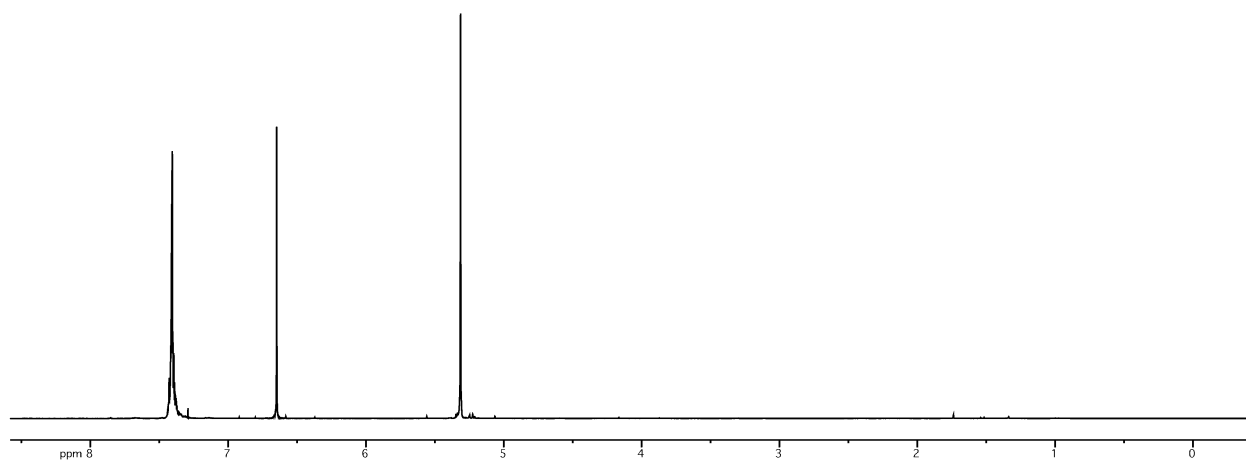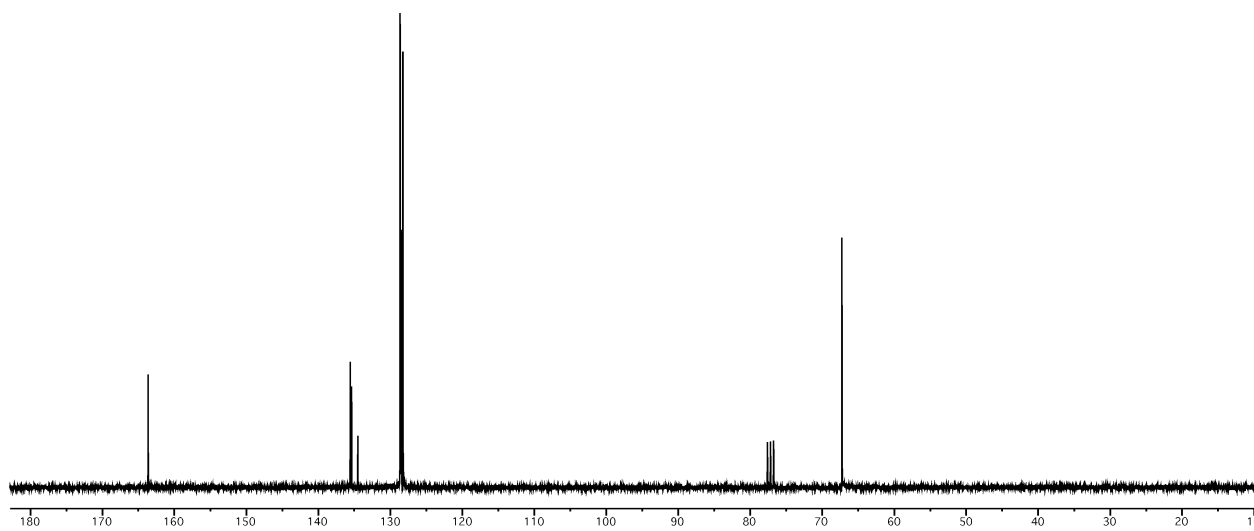

$^1\text{H}$  (500 MHz) and  $^{13}\text{C}$  NMR (125 MHz) spectra of enone **22** in  $\text{CDCl}_3$



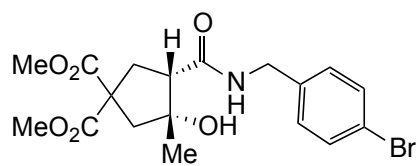**S16**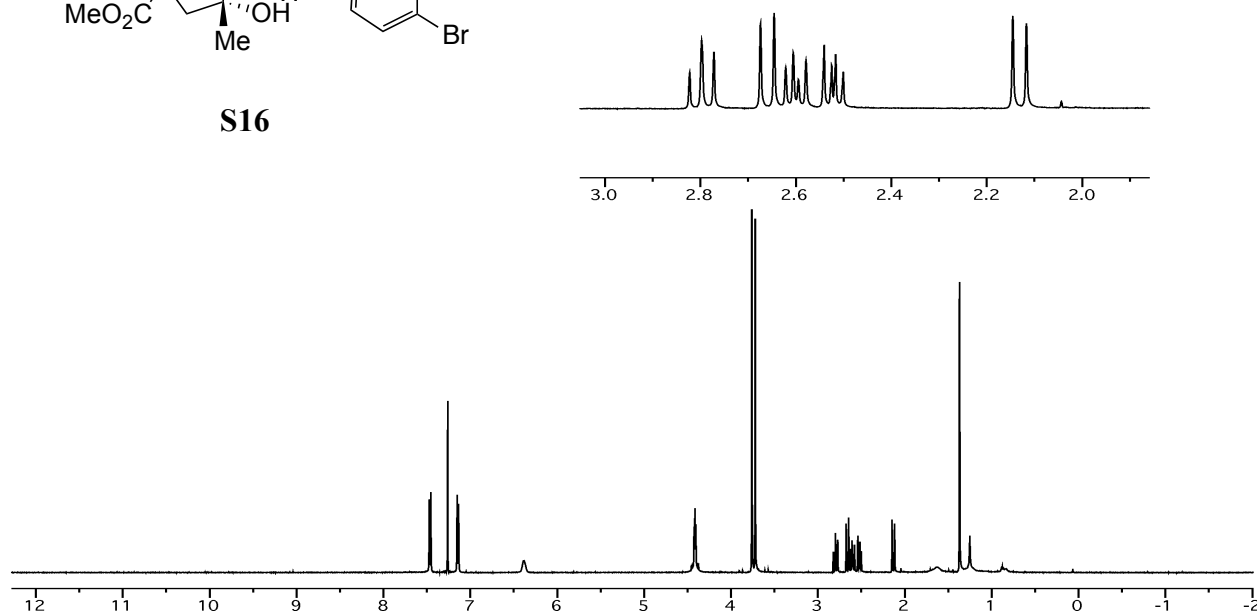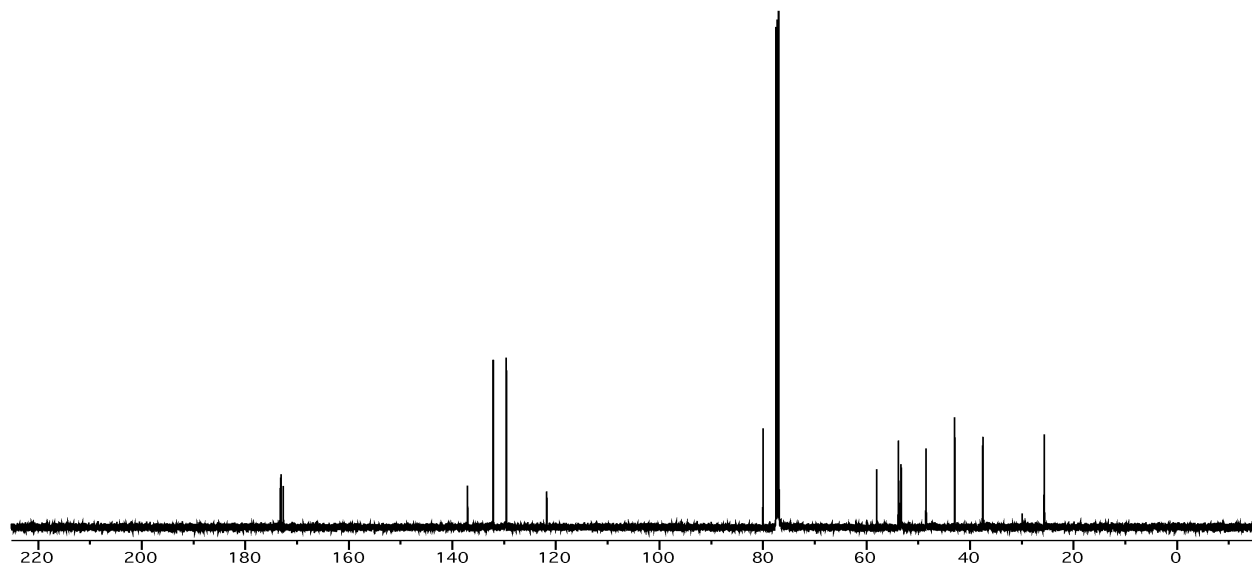 $^1\text{H}$  (500 MHz) and  $^{13}\text{C}$  NMR (125 MHz) spectra of amide **S16** in  $\text{CDCl}_3$

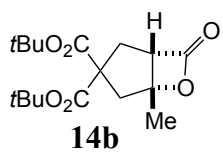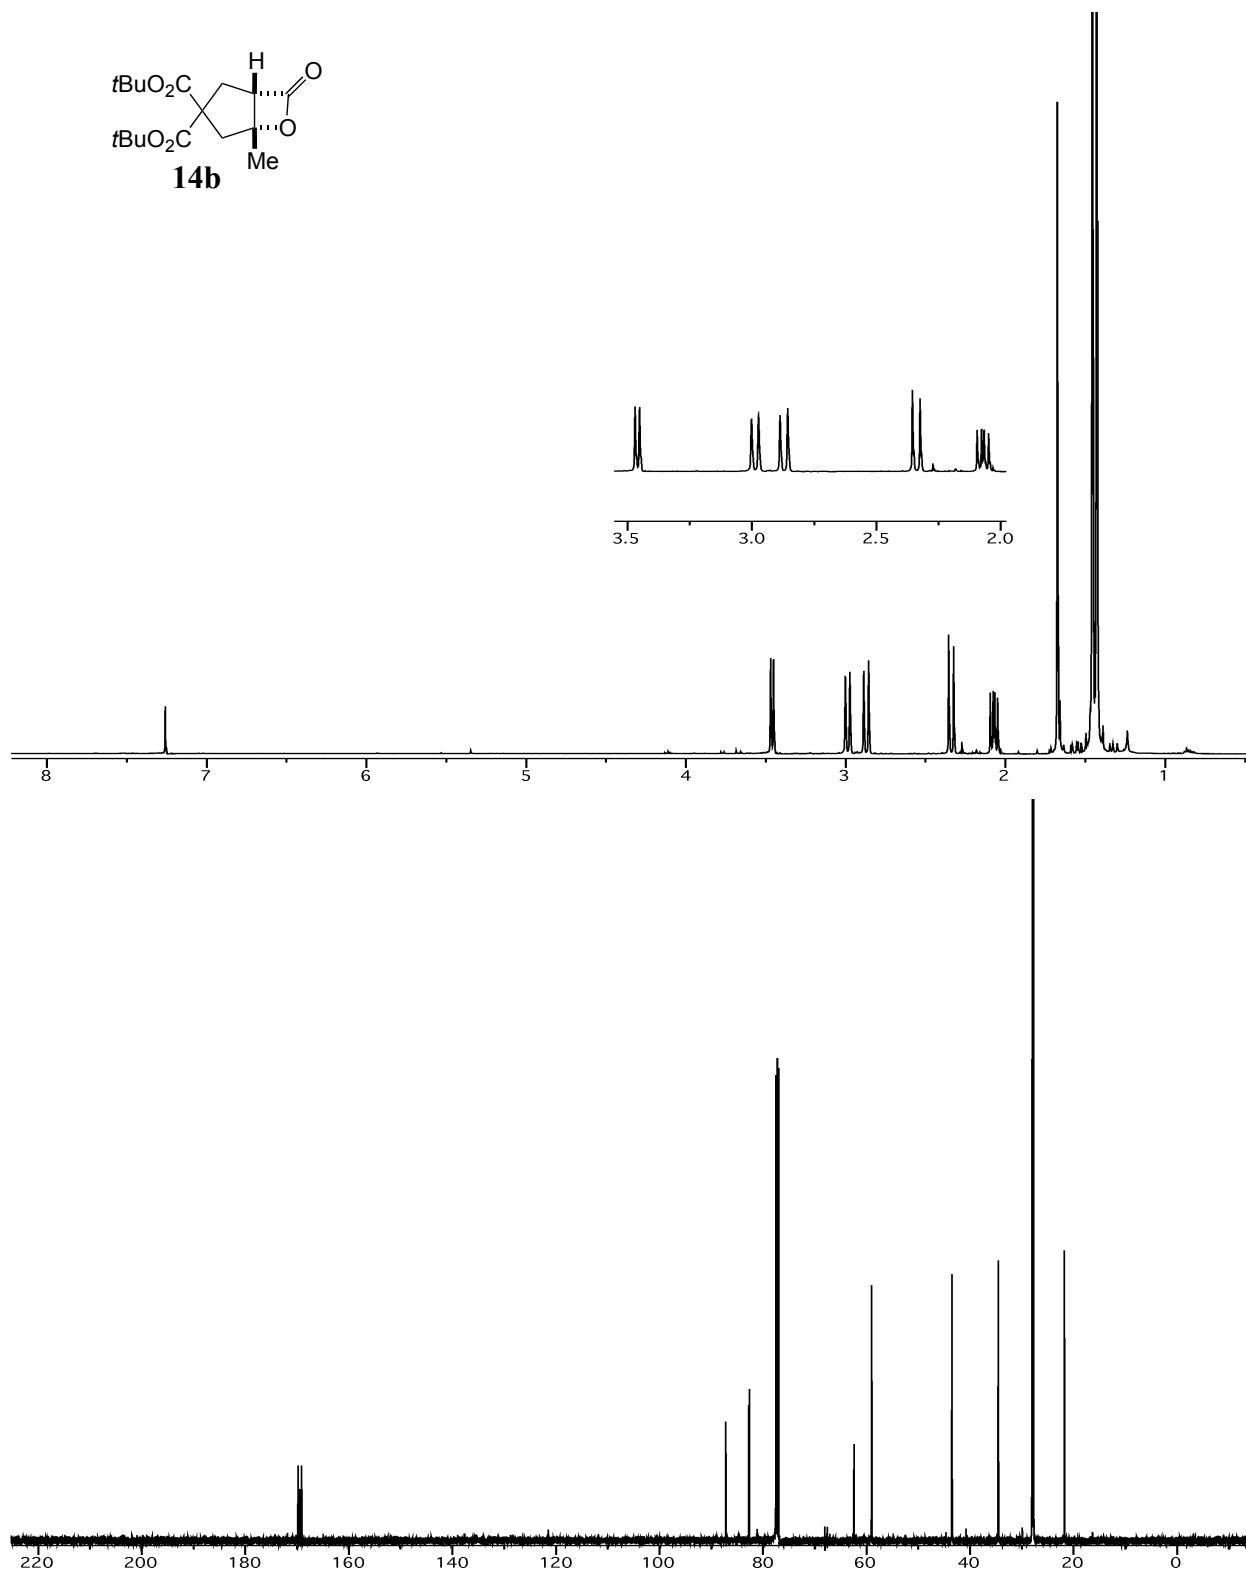

$^1\text{H}$  (500 MHz) and  $^{13}\text{C}$  NMR (125 MHz) spectra of  $\beta$ -lactone **14b** in  $\text{CDCl}_3$

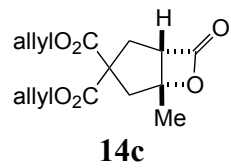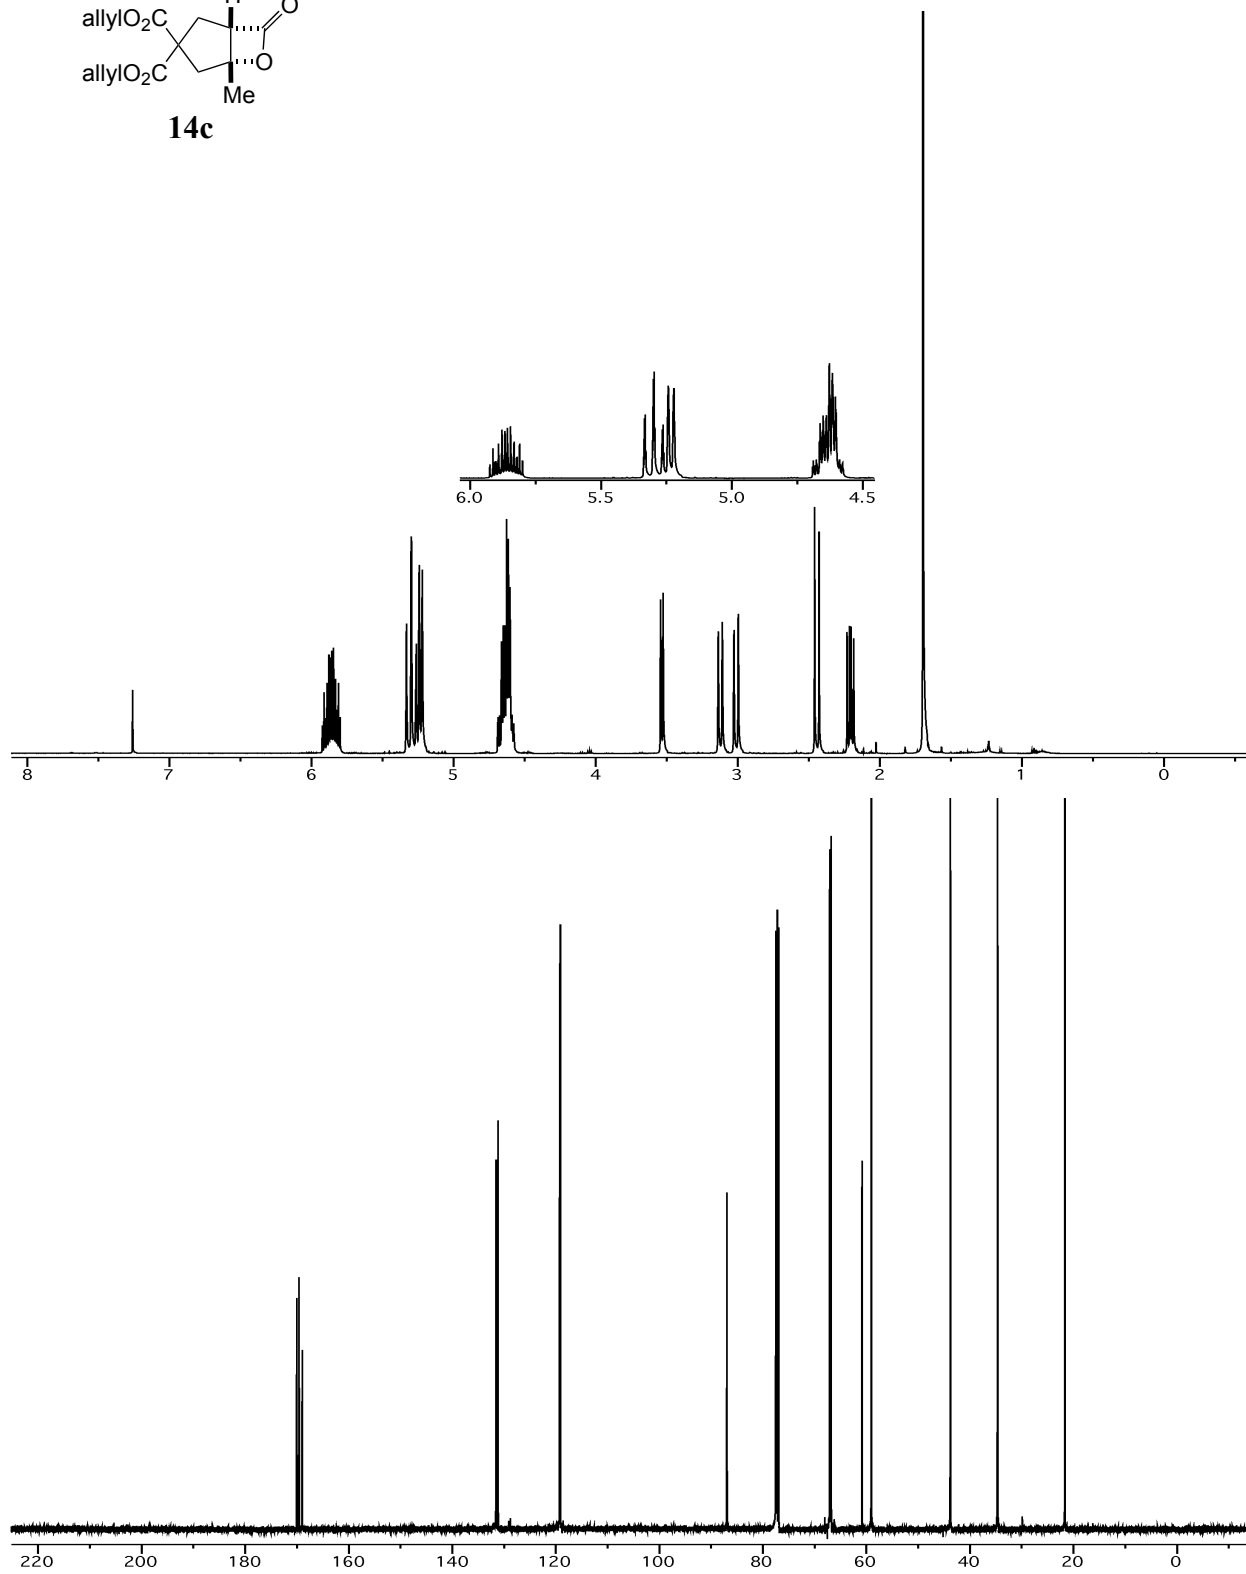

<sup>1</sup>H (500 MHz) and <sup>13</sup>C NMR (125 MHz) spectra of  $\beta$ -lactone **14c** in CDCl<sub>3</sub>

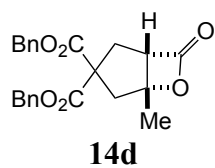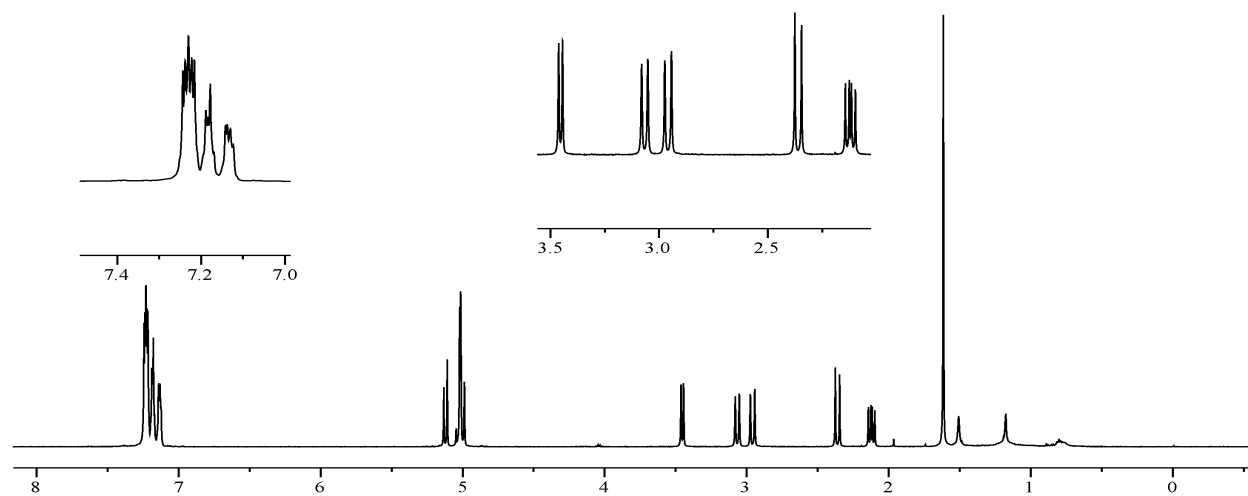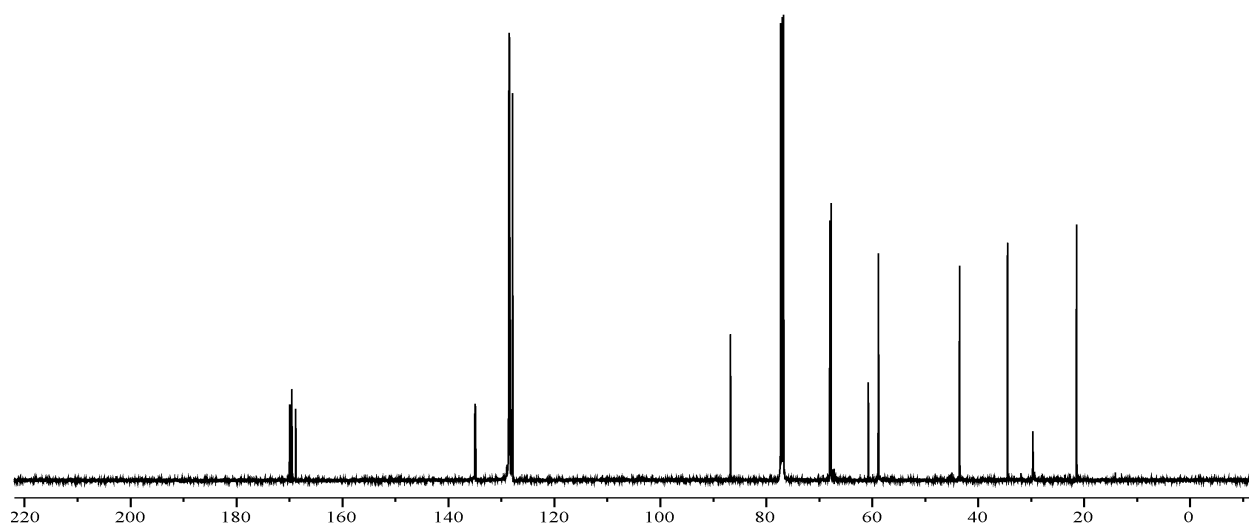

<sup>1</sup>H (500 MHz) and <sup>13</sup>C NMR (125 MHz) spectra of  $\beta$ -lactone **14d** in CDCl<sub>3</sub>

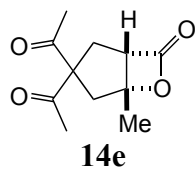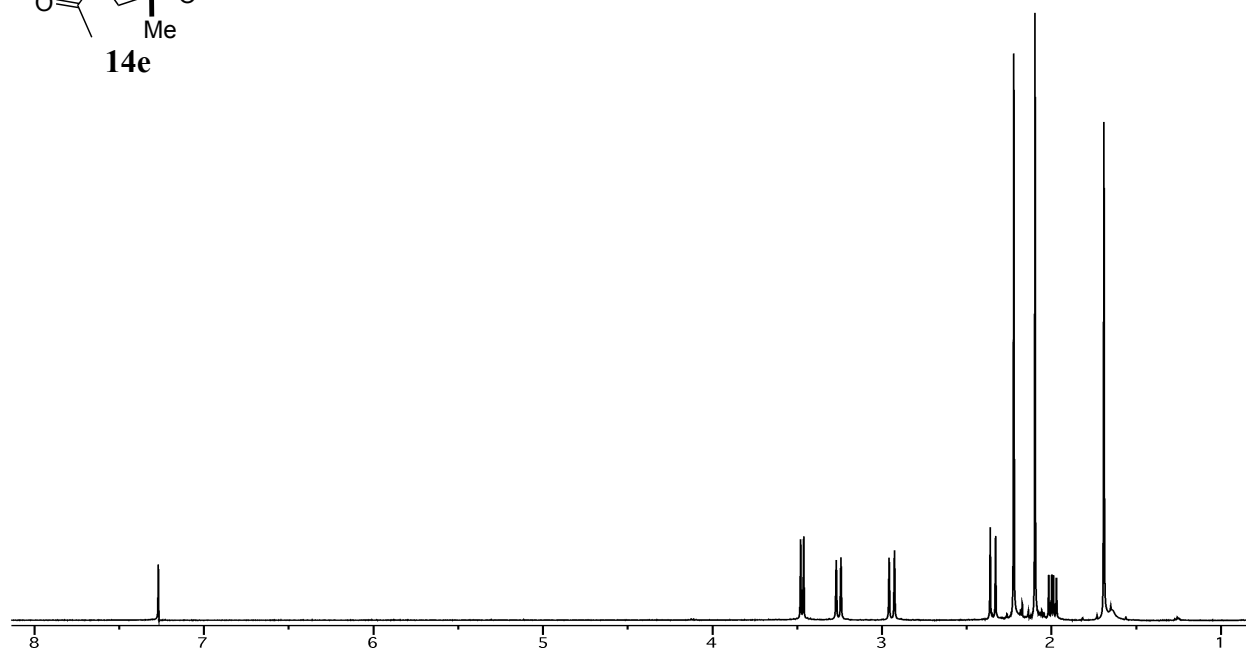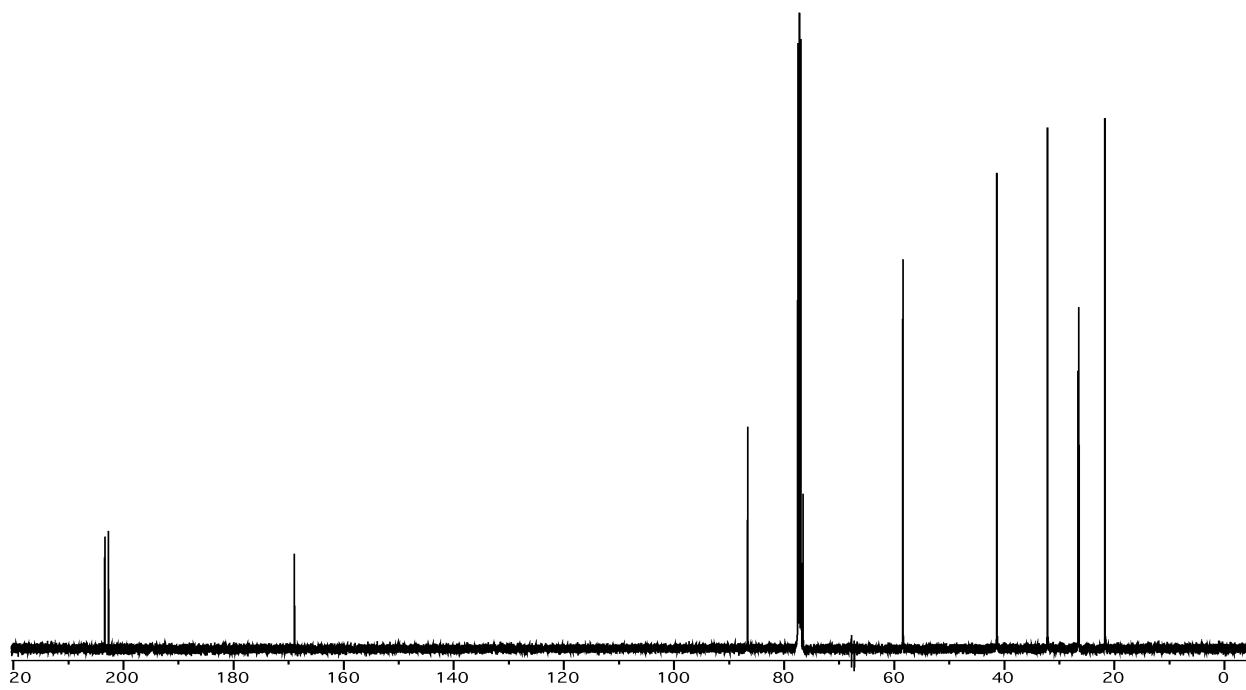

<sup>1</sup>H (300 MHz) and <sup>13</sup>C NMR (75 MHz) spectra of  $\beta$ -lactone **14e** in CDCl<sub>3</sub>

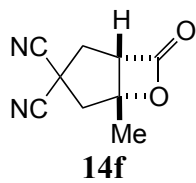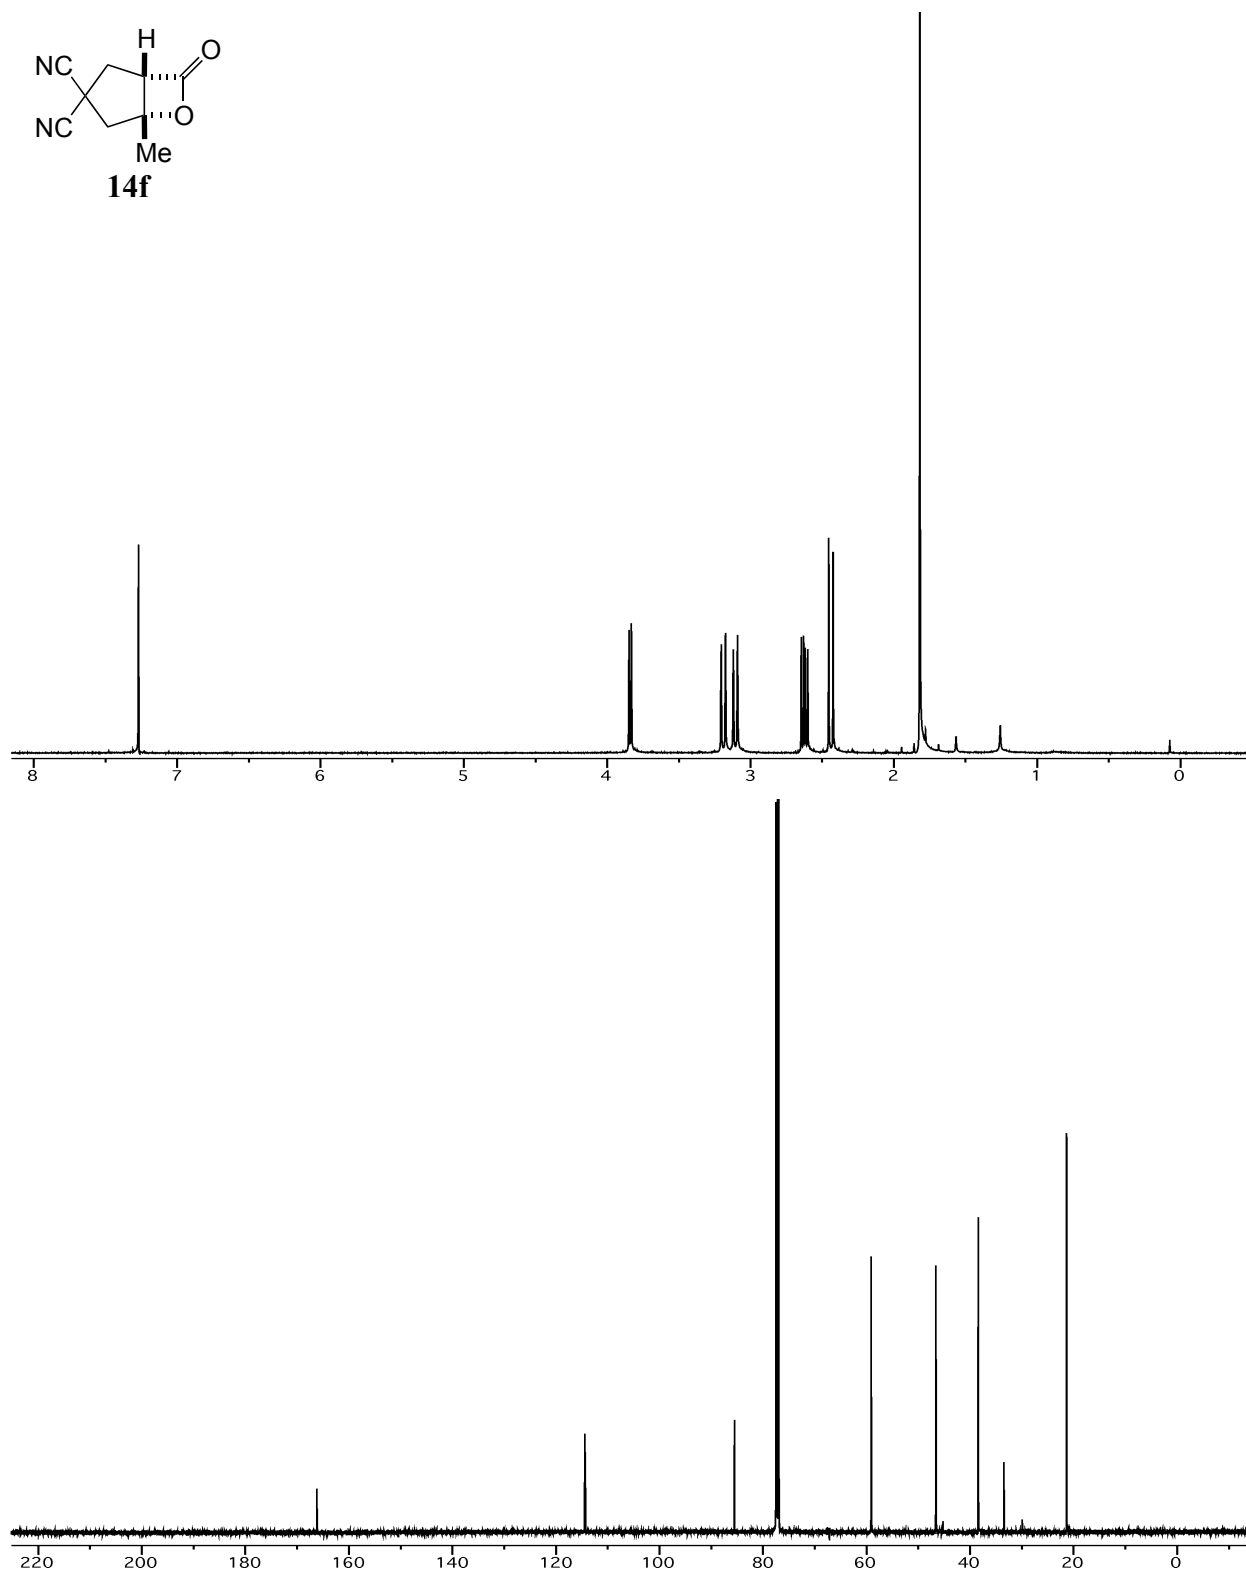

$^1\text{H}$  (500 MHz) and  $^{13}\text{C}$  NMR (125 MHz) spectra of  $\beta$ -lactone **14f** in  $\text{CDCl}_3$

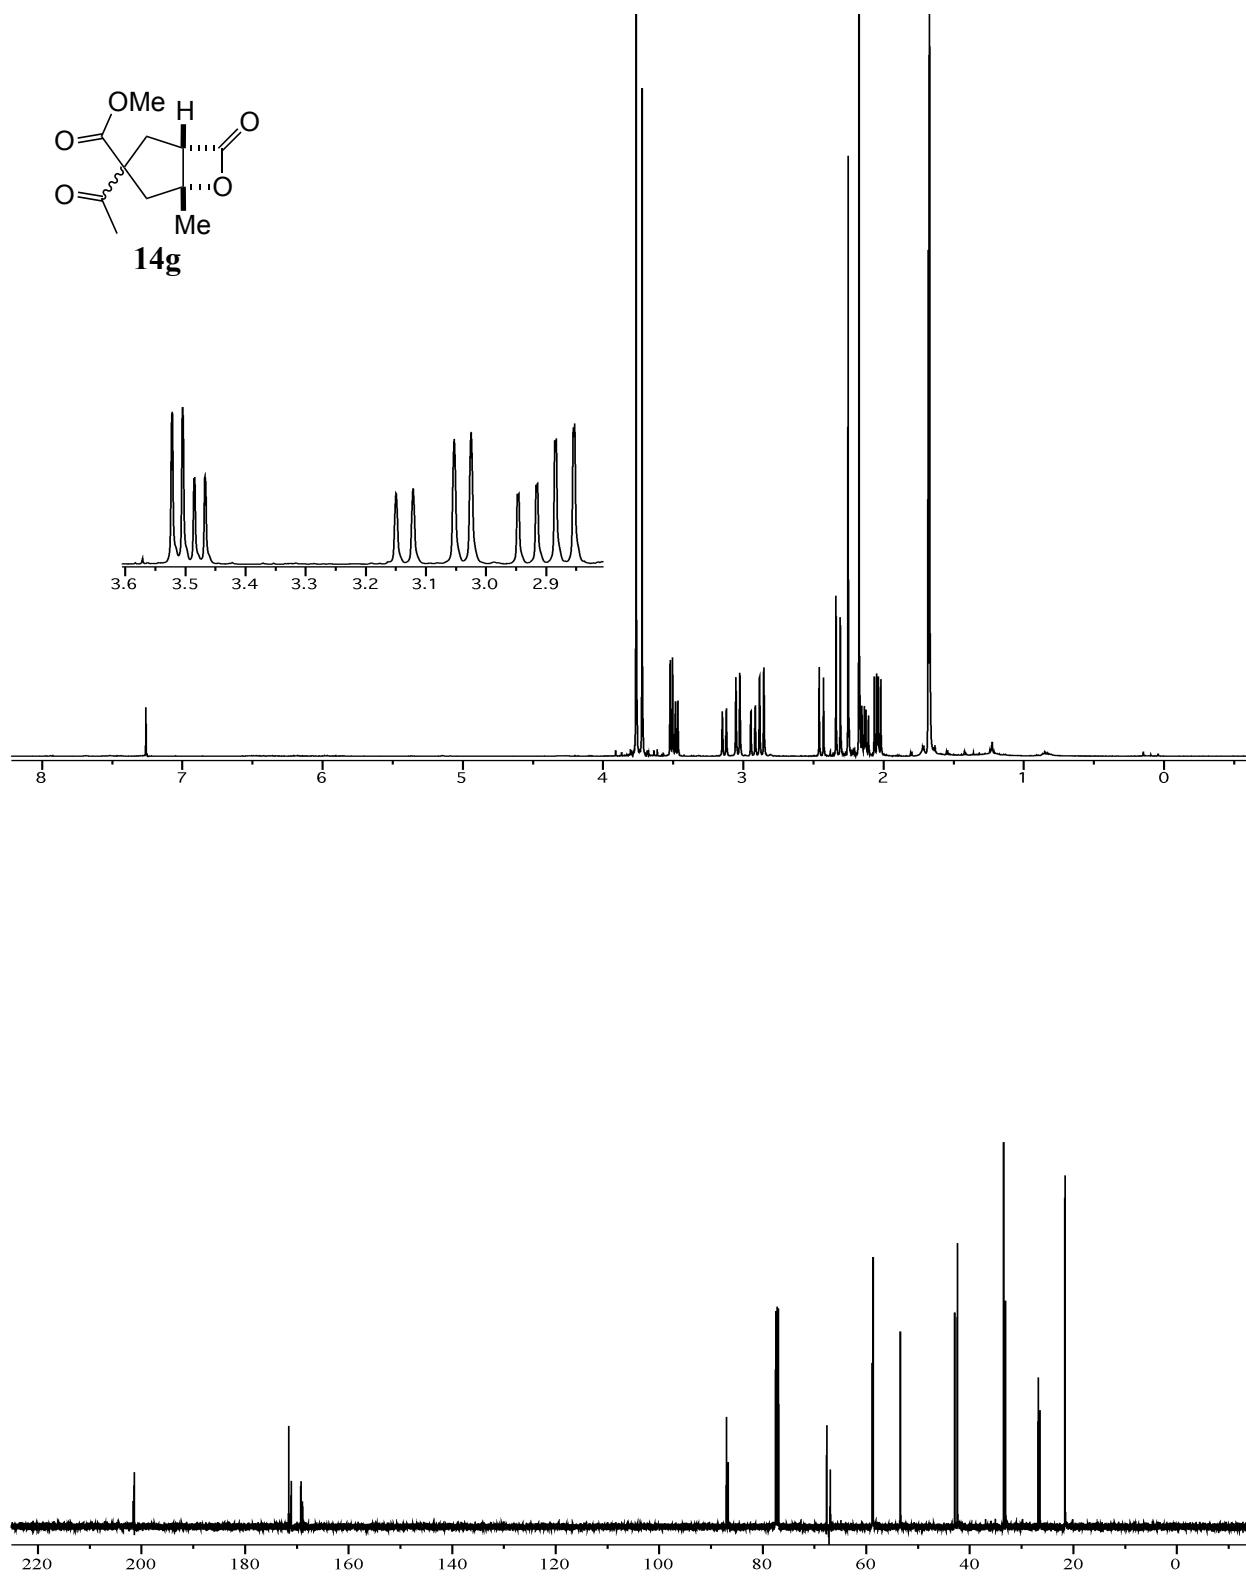

$^1\text{H}$  (500 MHz) and  $^{13}\text{C}$  NMR (125 MHz) spectra of  $\beta$ -lactone **14g** in  $\text{CDCl}_3$

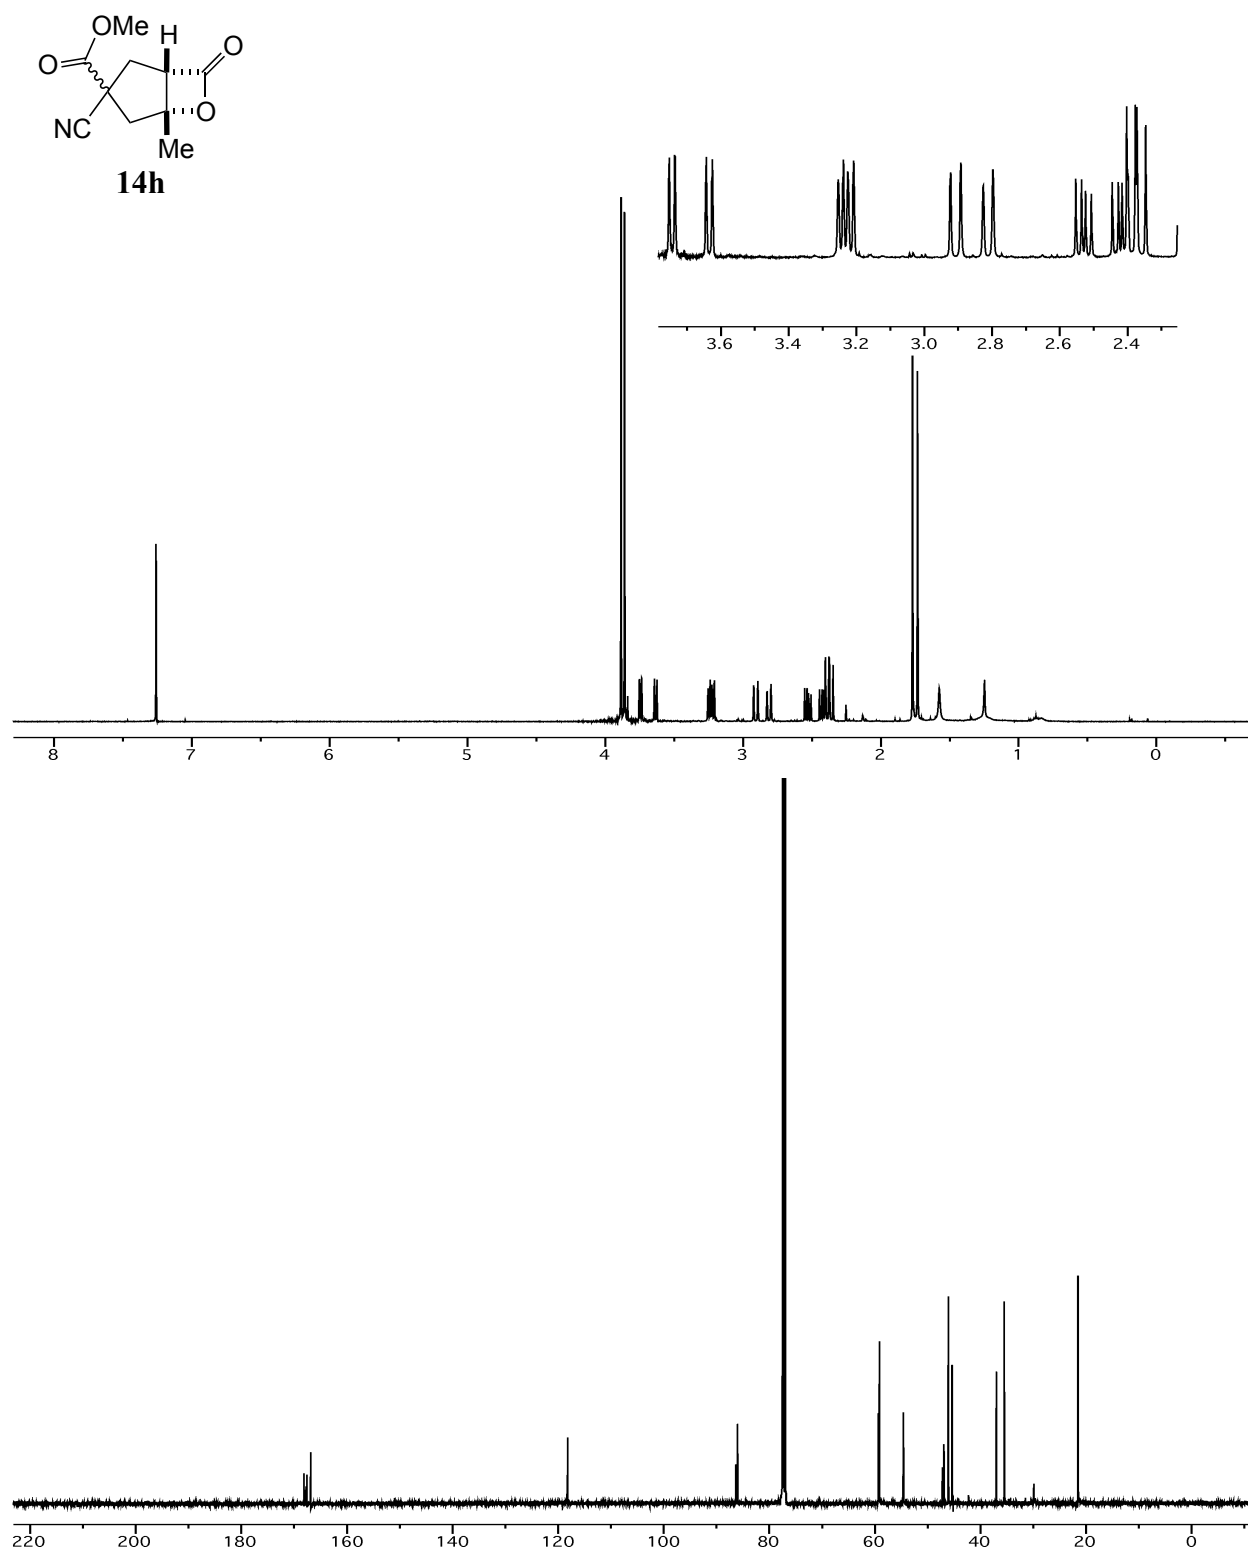

$^1\text{H}$  (500 MHz) and  $^{13}\text{C}$  NMR (125 MHz) spectra of  $\beta$ -lactone **14h** in  $\text{CDCl}_3$



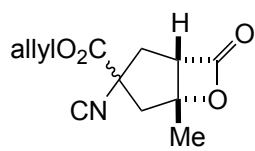**14i**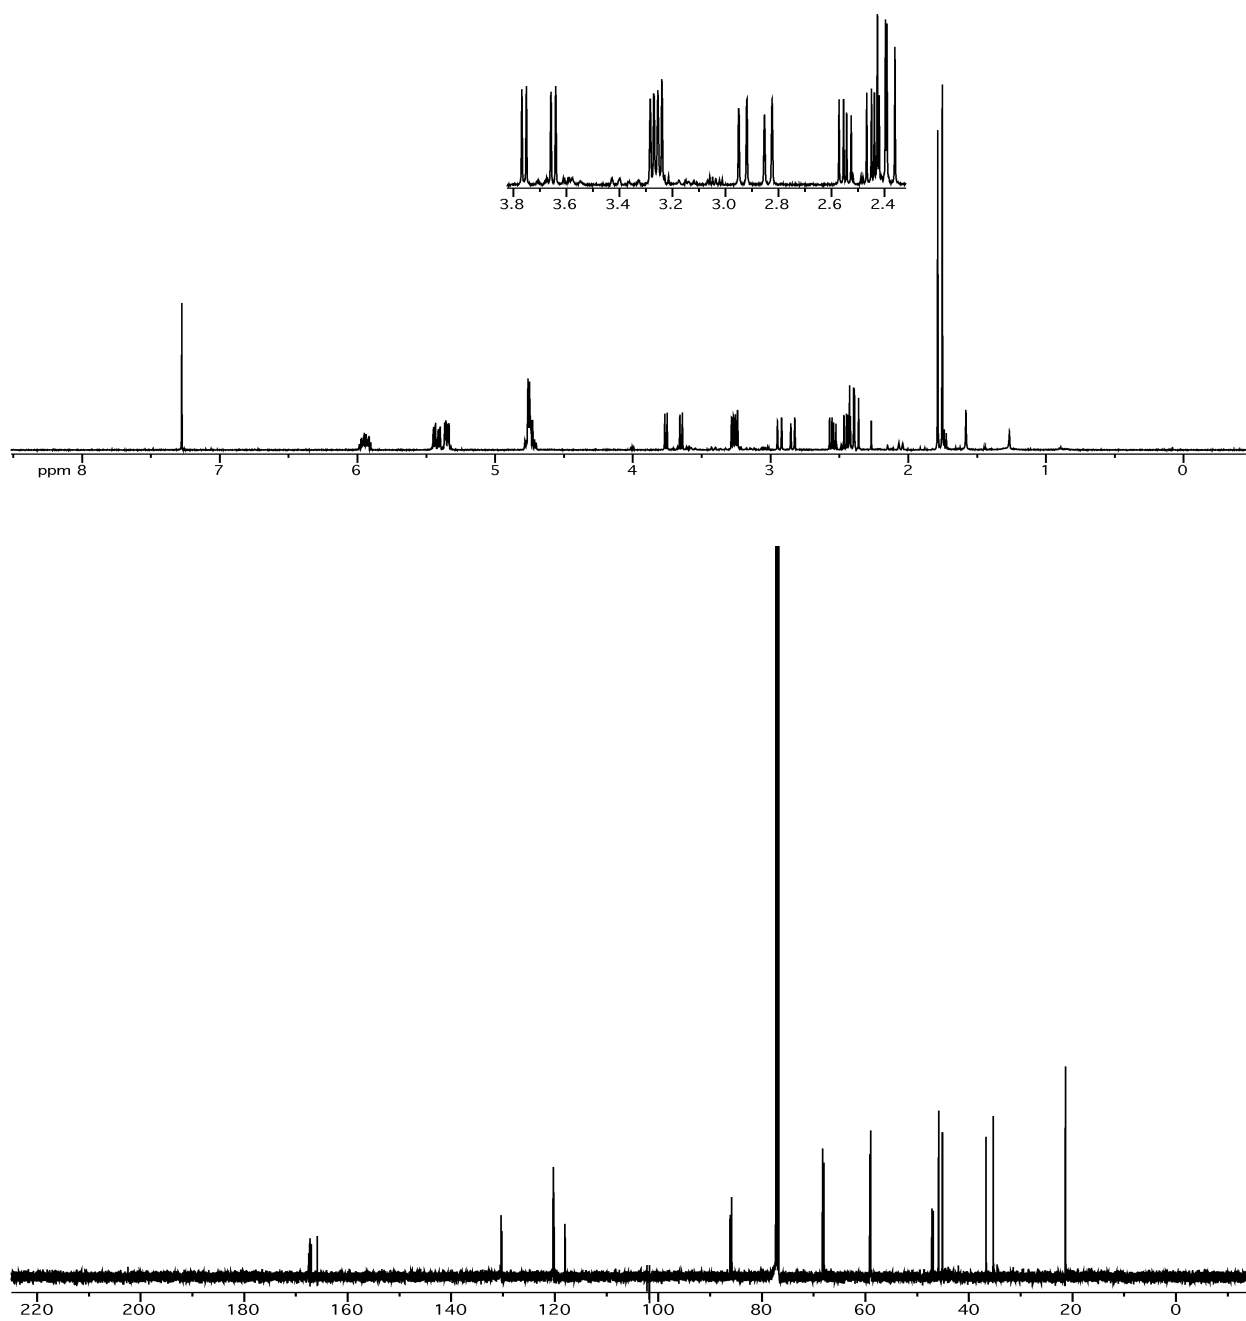

<sup>1</sup>H (500 MHz) and <sup>13</sup>C NMR (125 MHz) spectra of  $\beta$ -lactone **14i** in CDCl<sub>3</sub>

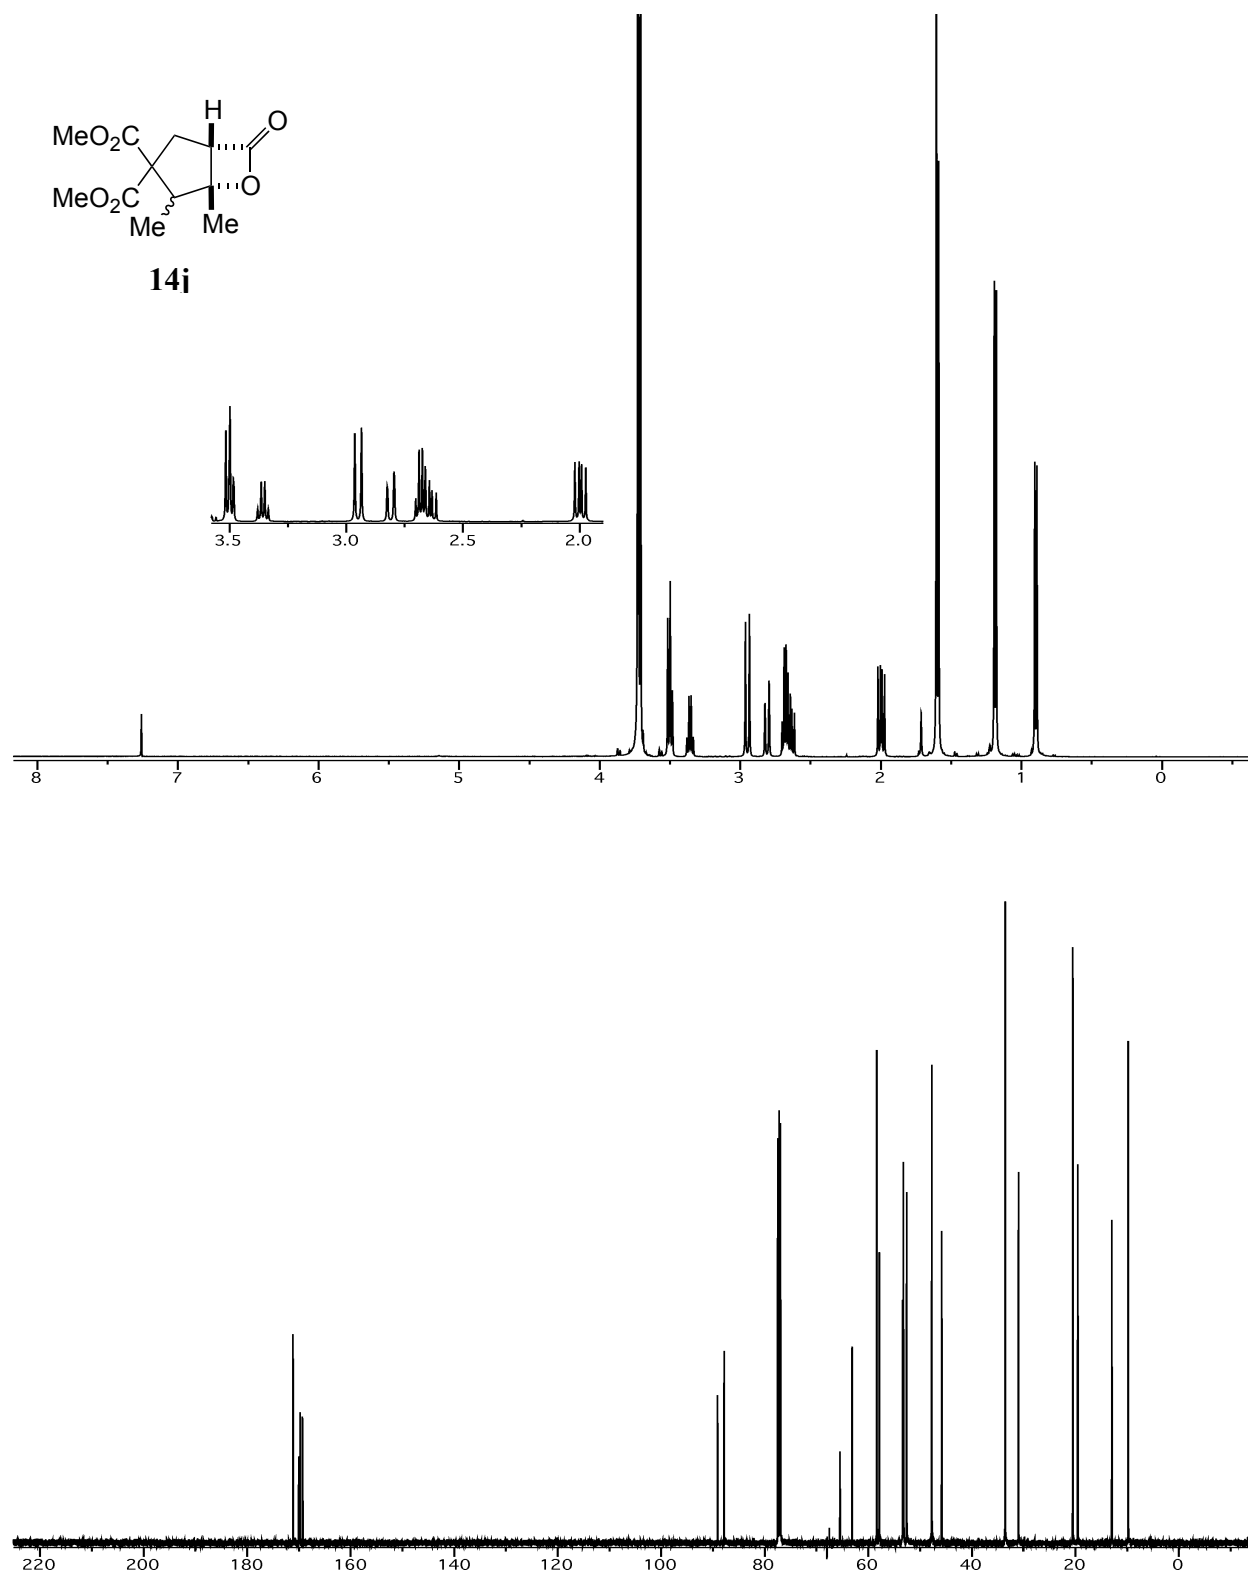

$^1\text{H}$  (500 MHz) and  $^{13}\text{C}$  NMR (125 MHz) spectra of  $\beta$ -lactone **14j** in  $\text{CDCl}_3$

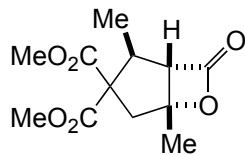**14k**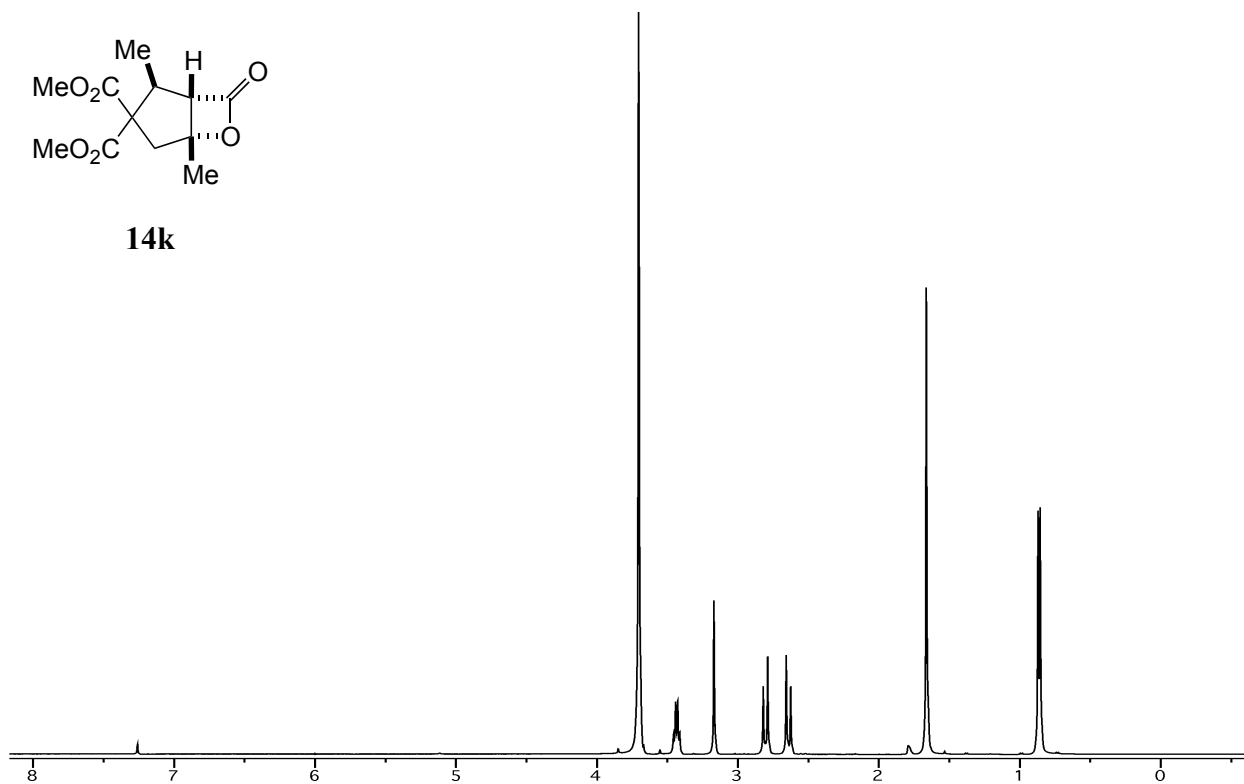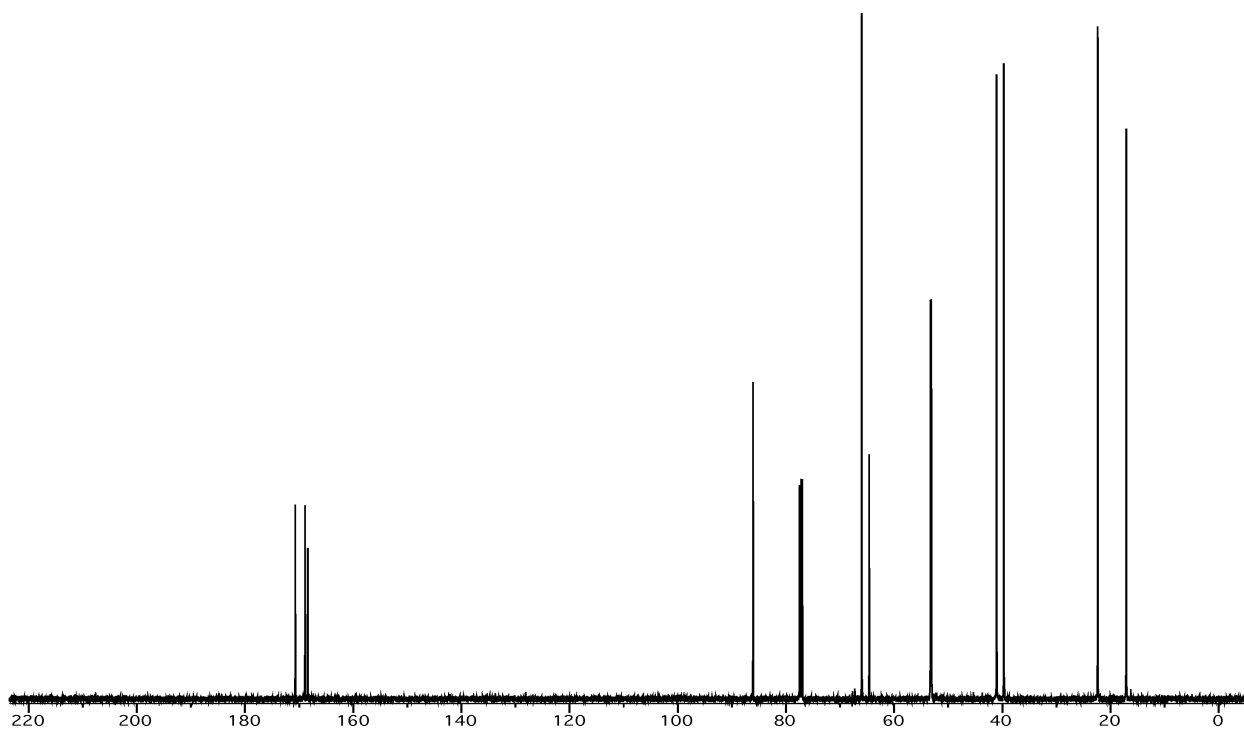 $^1\text{H}$  (500 MHz) and  $^{13}\text{C}$  NMR (125 MHz) spectra of  $\beta$ -lactone **14k** in  $\text{CDCl}_3$

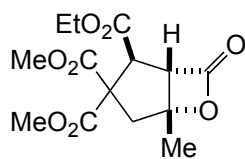**14l**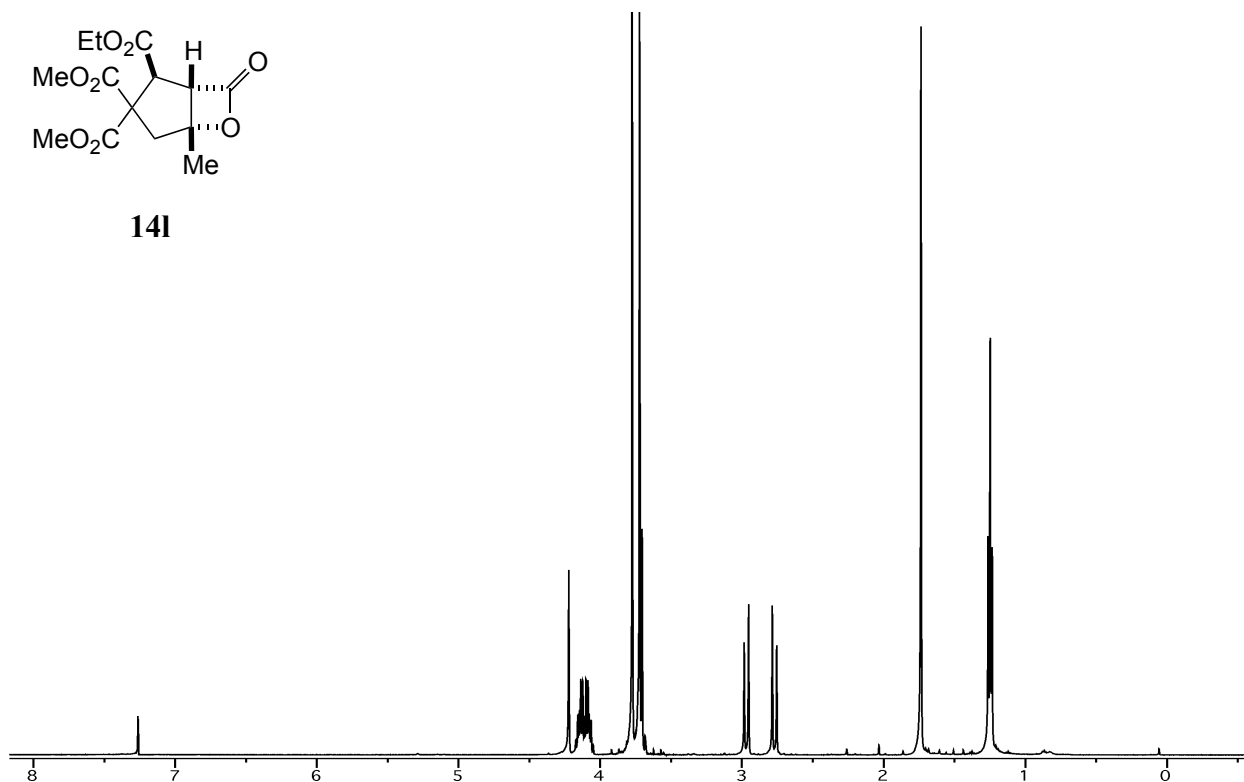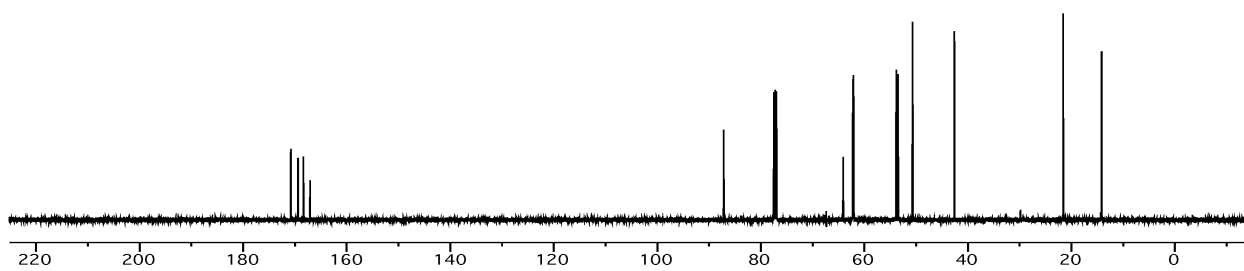

<sup>1</sup>H (500 MHz) and <sup>13</sup>C NMR (125 MHz) spectra of  $\beta$ -lactone **14l** in CDCl<sub>3</sub>

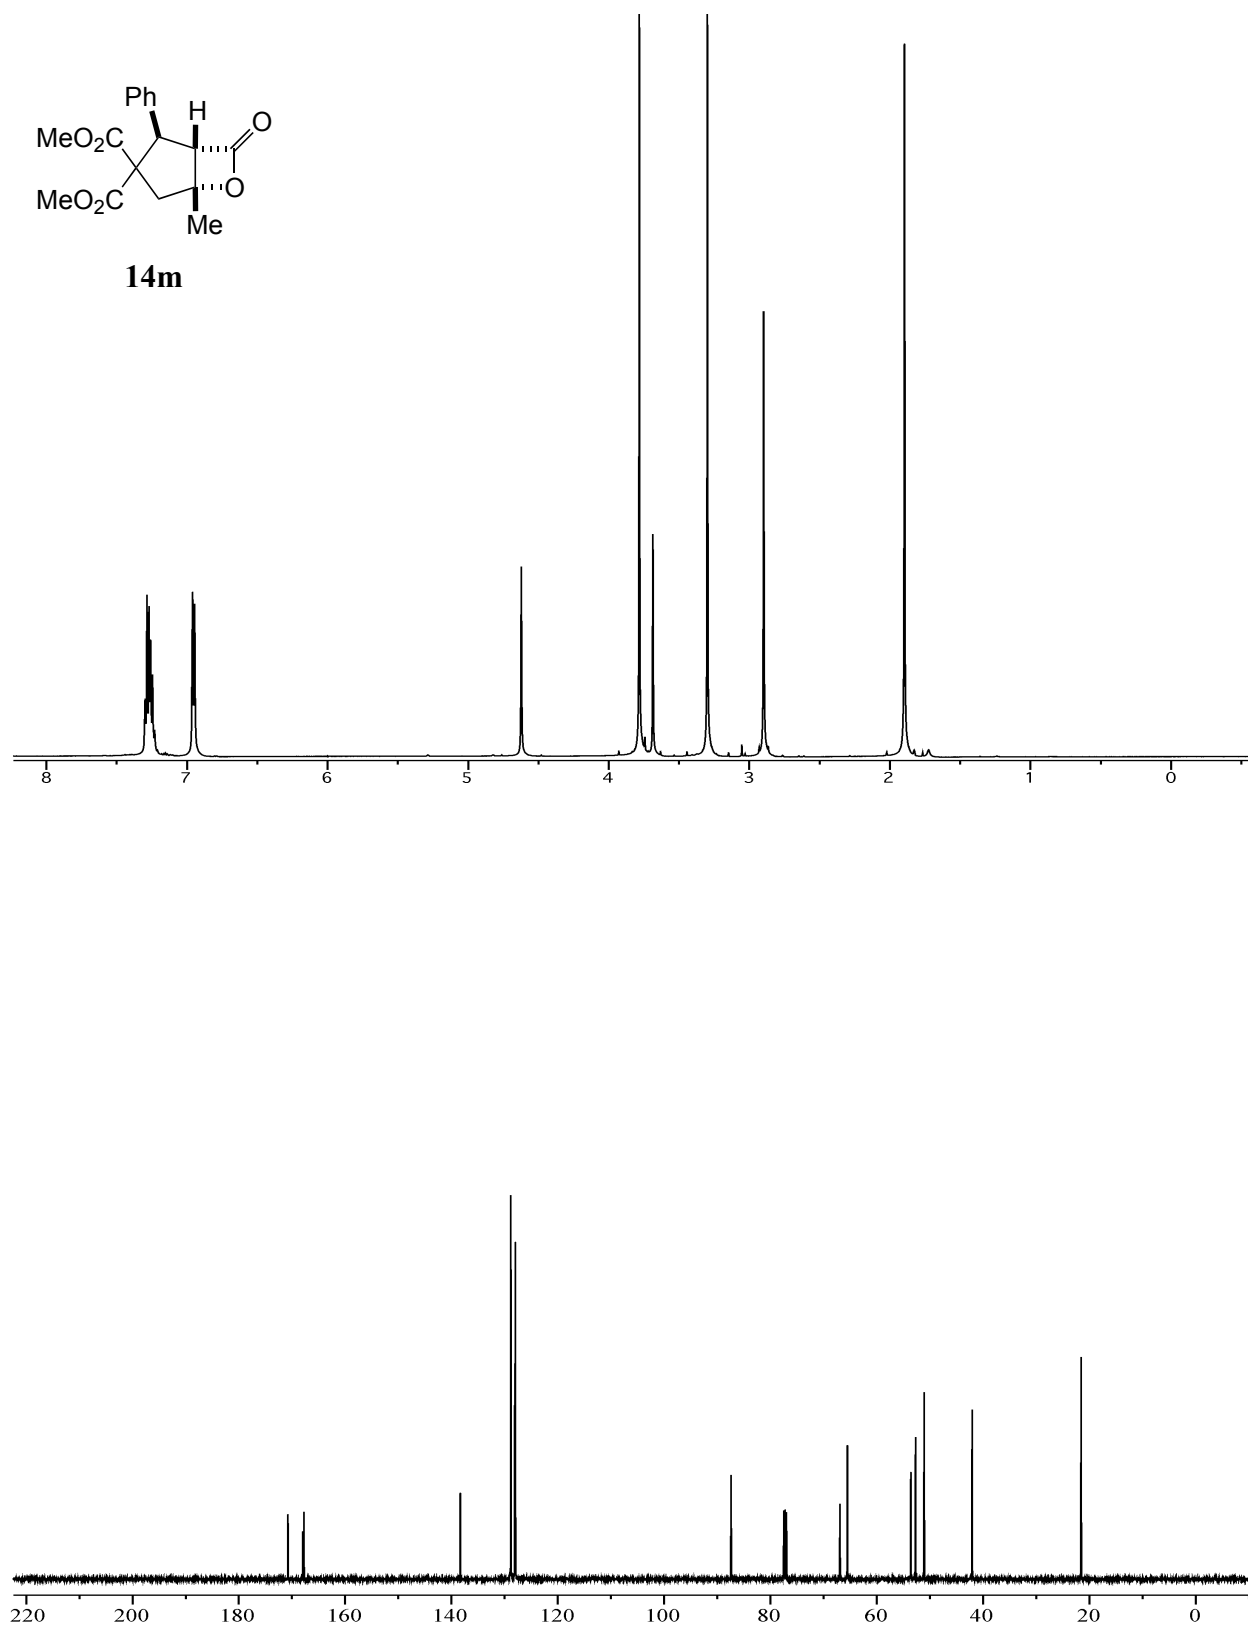

$^1\text{H}$  (500 MHz) and  $^{13}\text{C}$  NMR (125 MHz) spectra of  $\beta$ -lactone **14m** in  $\text{CDCl}_3$

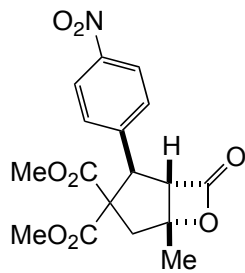**14n**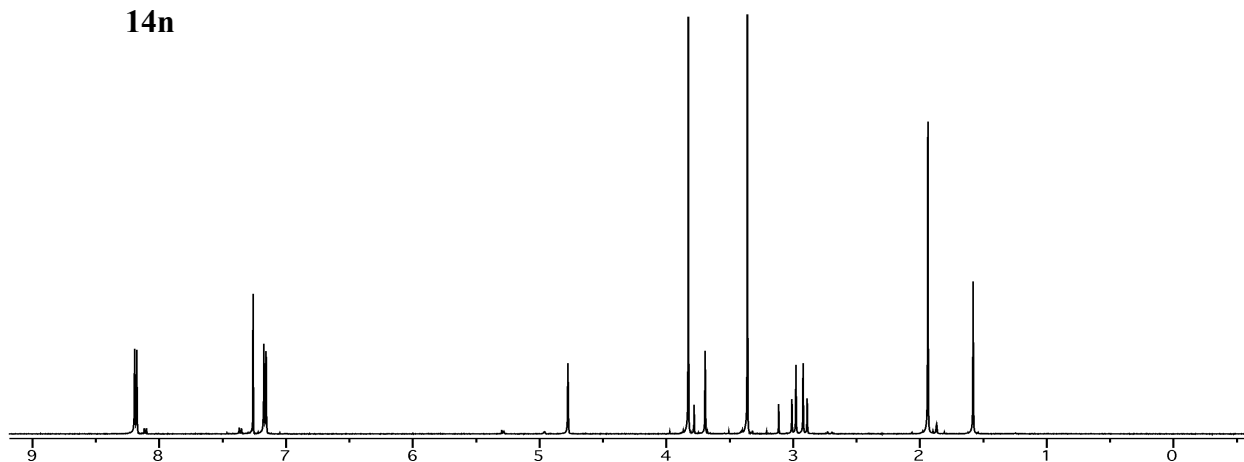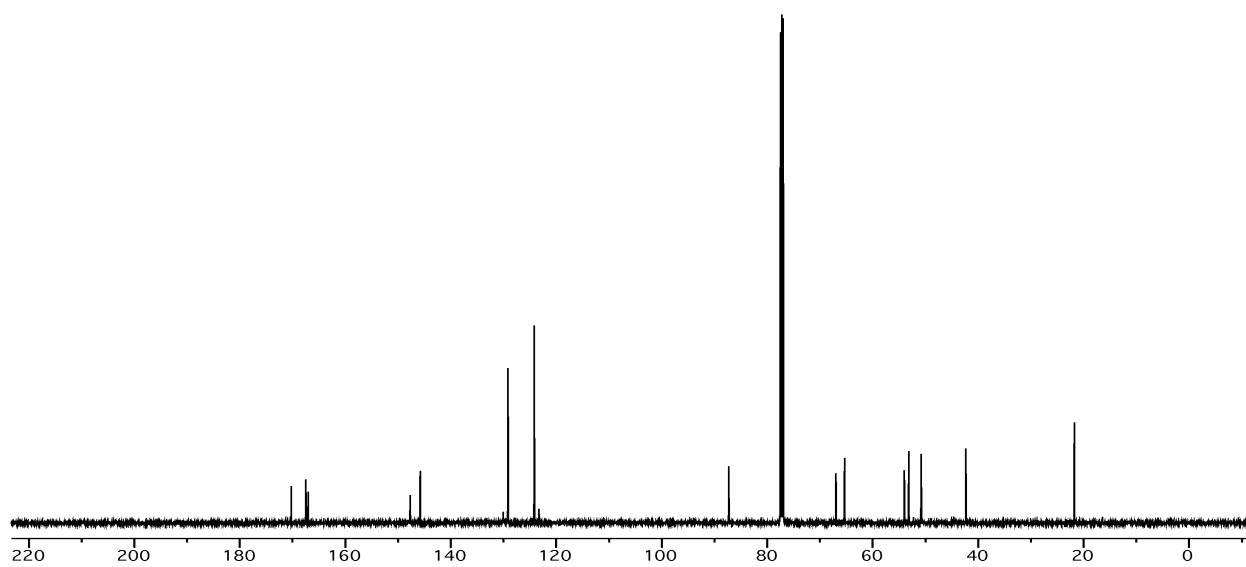 $^1\text{H}$  (500 MHz) and  $^{13}\text{C}$  NMR (125 MHz) spectra of  $\beta$ -lactone **14n** in  $\text{CDCl}_3$

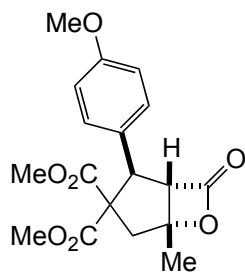**14o**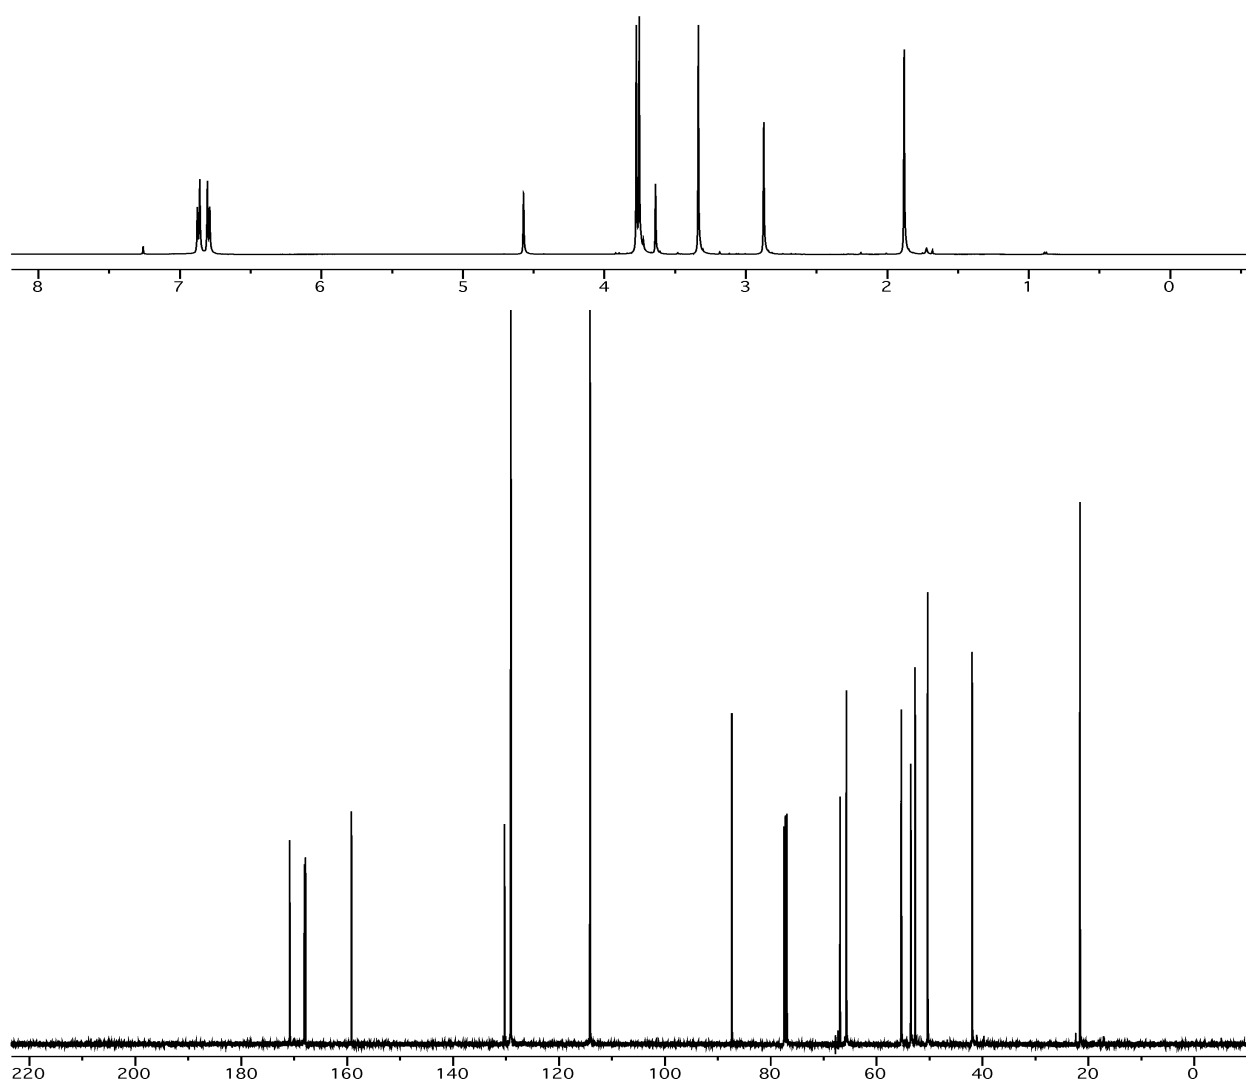 $^1\text{H}$  (500 MHz) and  $^{13}\text{C}$  NMR (125 MHz) spectra of  $\beta$ -lactone **14o** in  $\text{CDCl}_3$

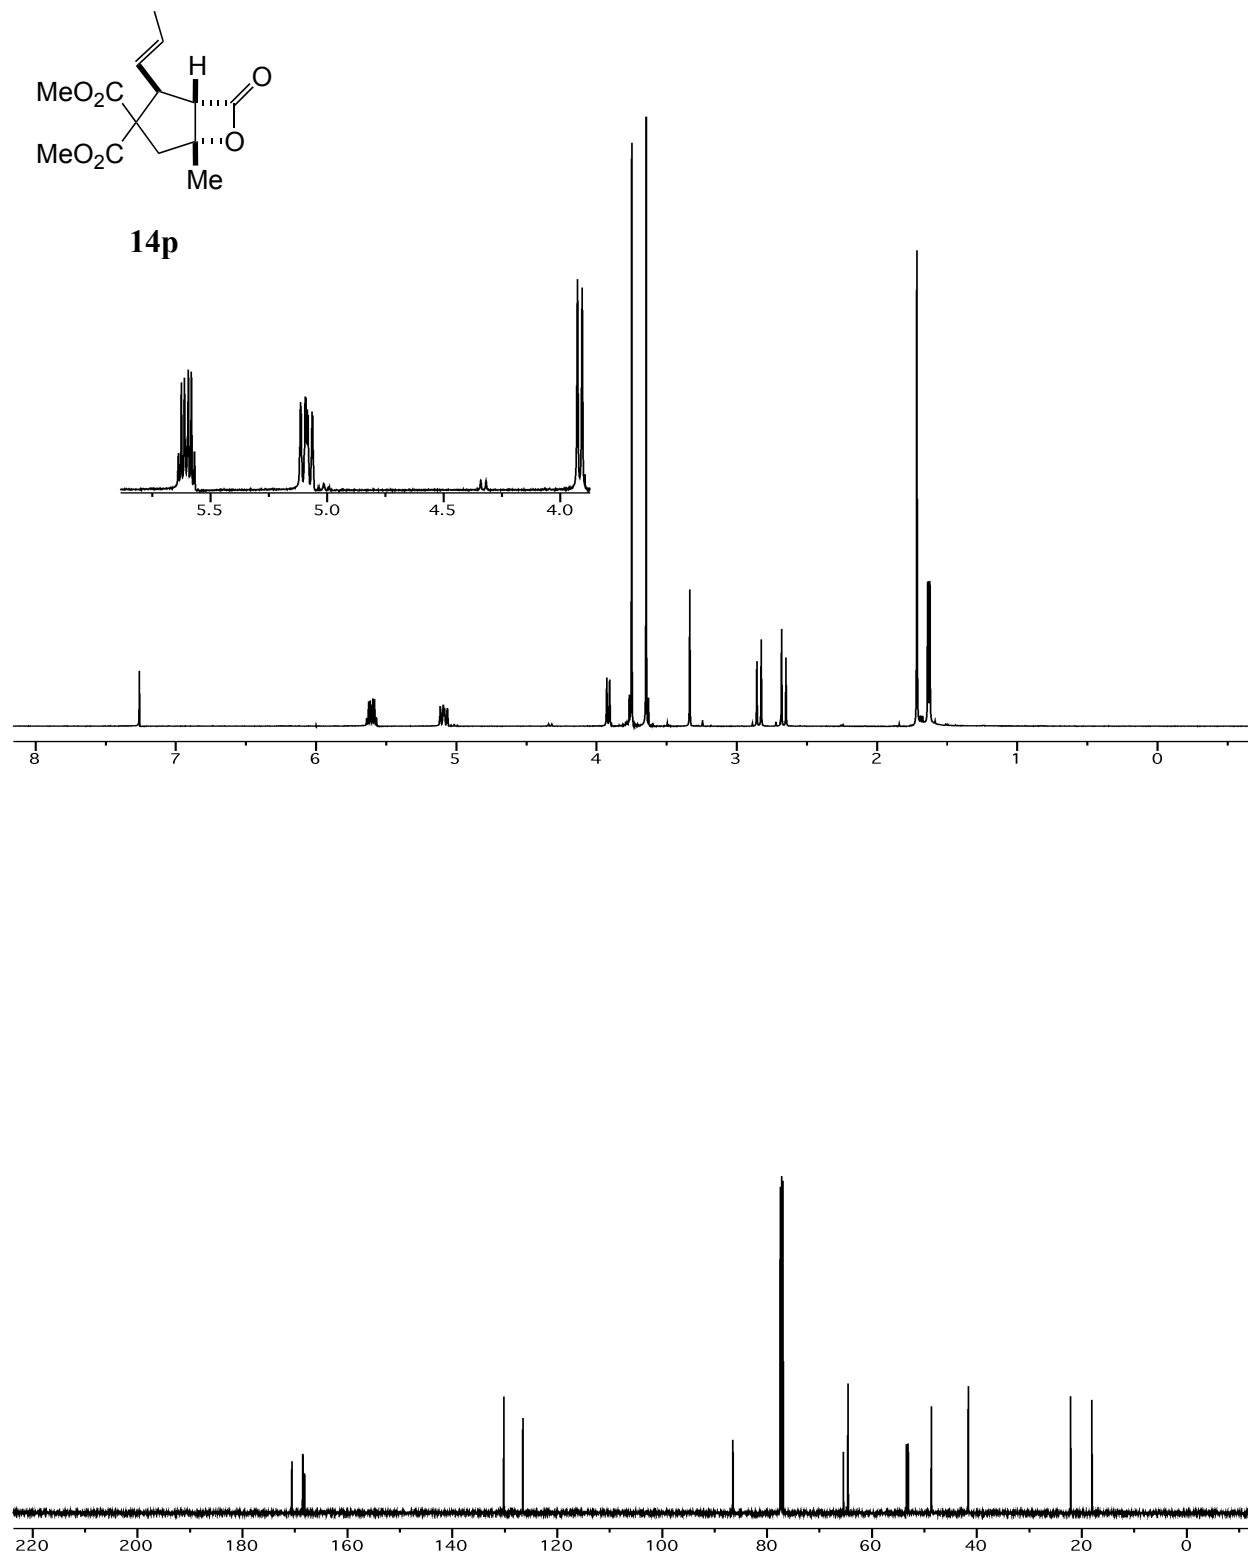



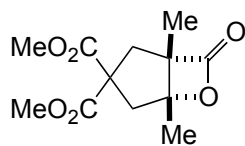**14q**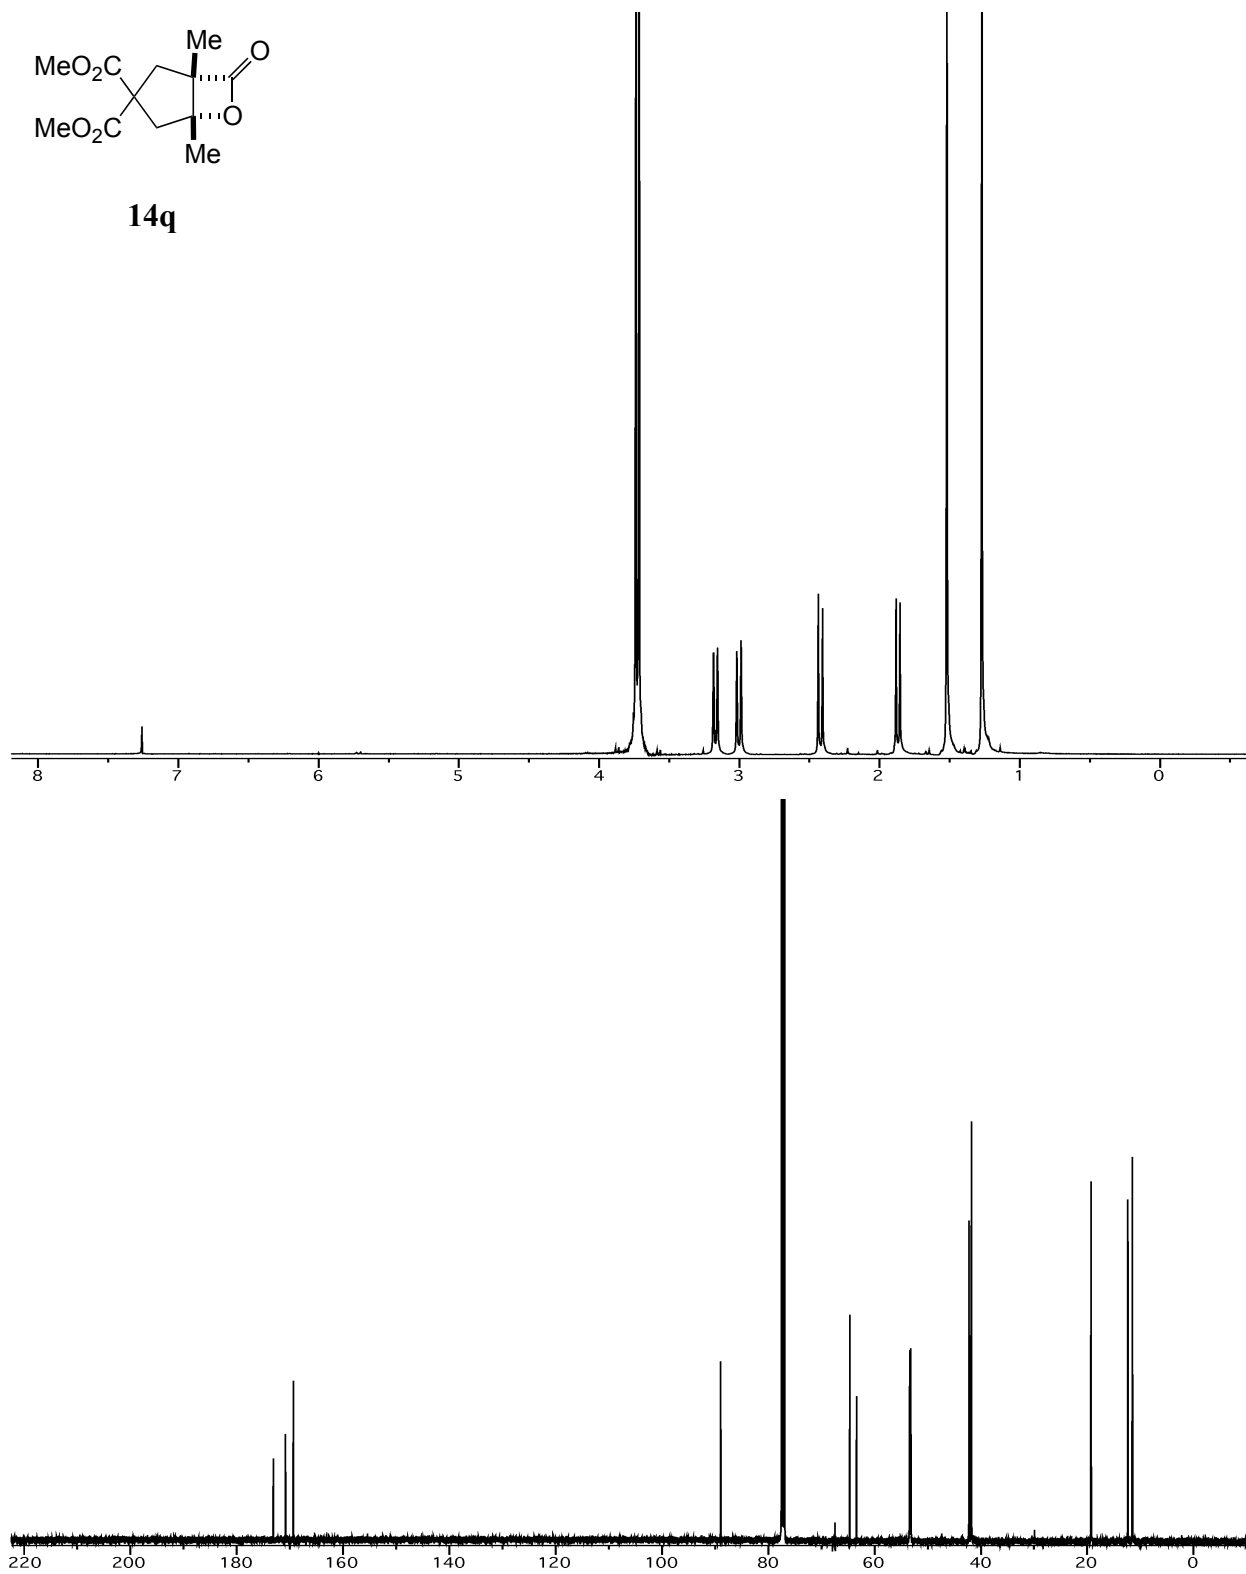 $^1\text{H}$  (500 MHz) and  $^{13}\text{C}$  NMR (125 MHz) spectra of  $\beta$ -lactone **14q** in  $\text{CDCl}_3$

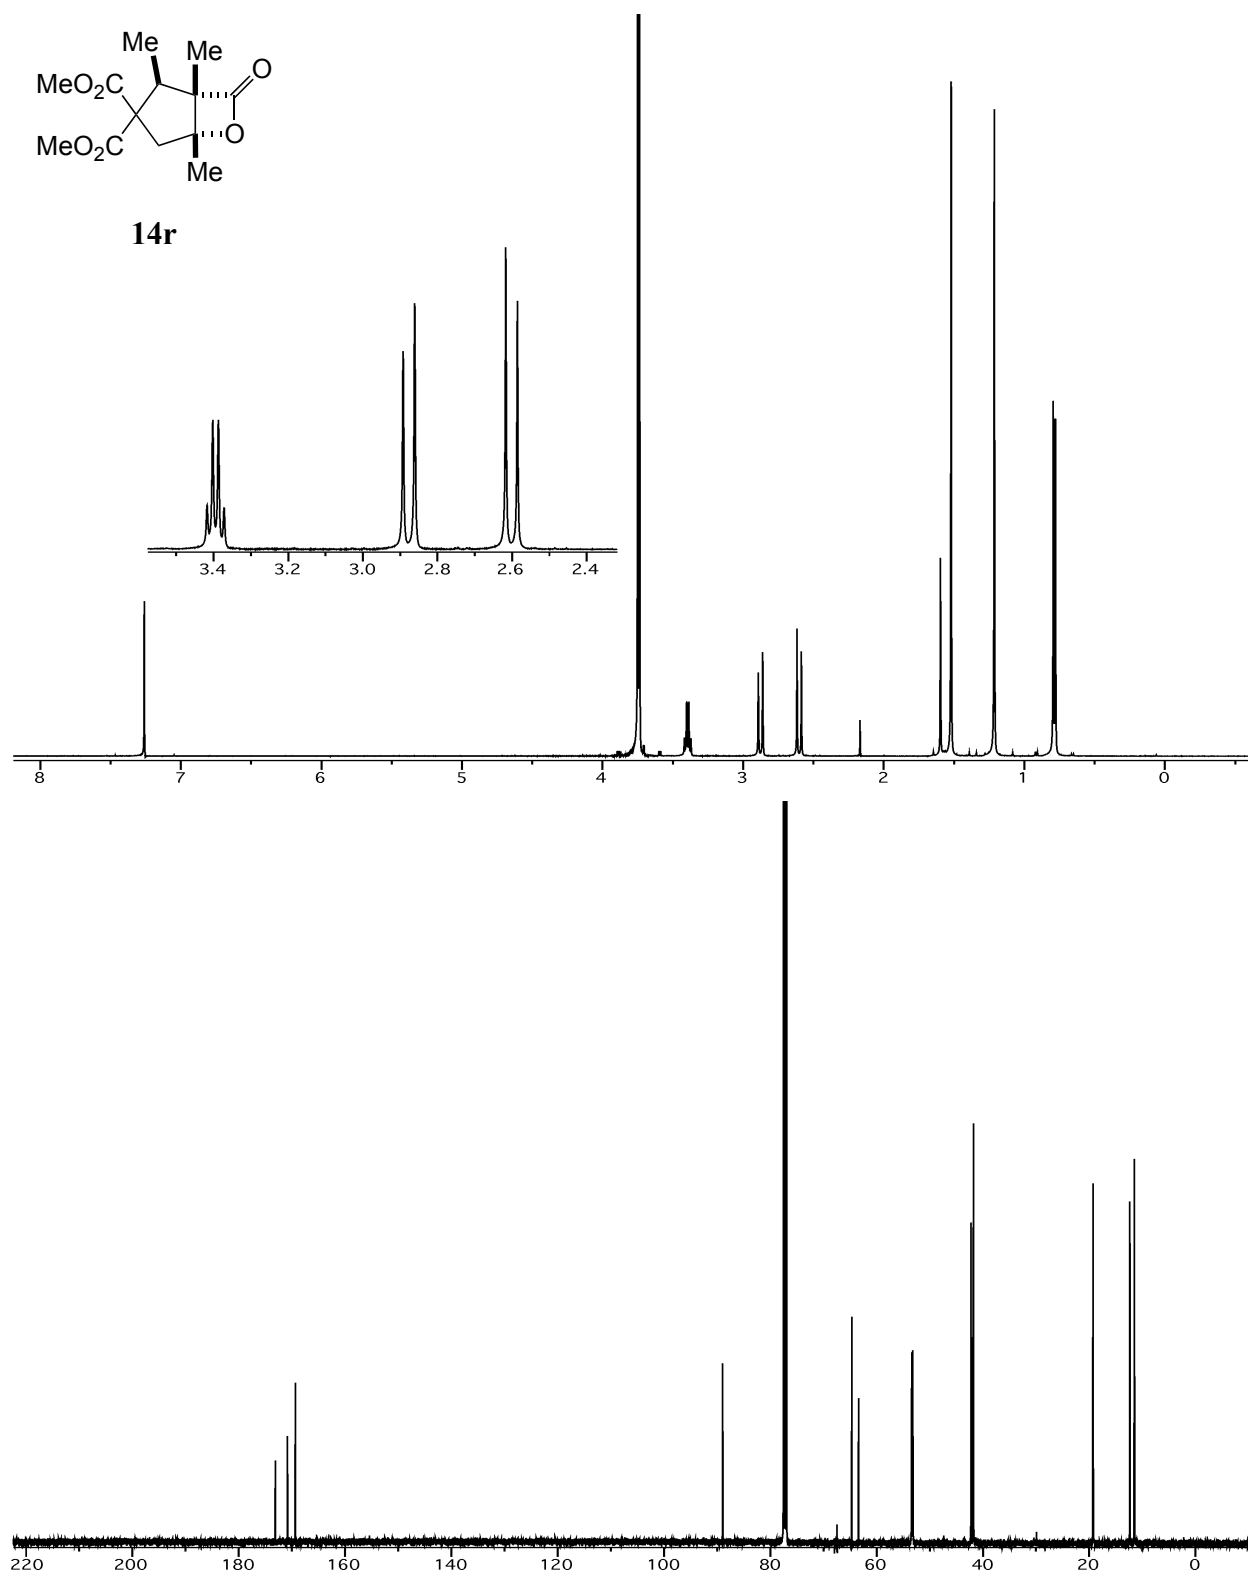

$^1\text{H}$  (500 MHz) and  $^{13}\text{C}$  NMR (125 MHz) spectra of  $\beta$ -lactone **14r** in  $\text{CDCl}_3$

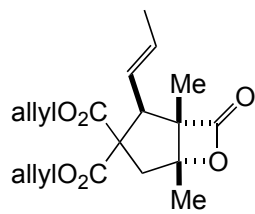**14s**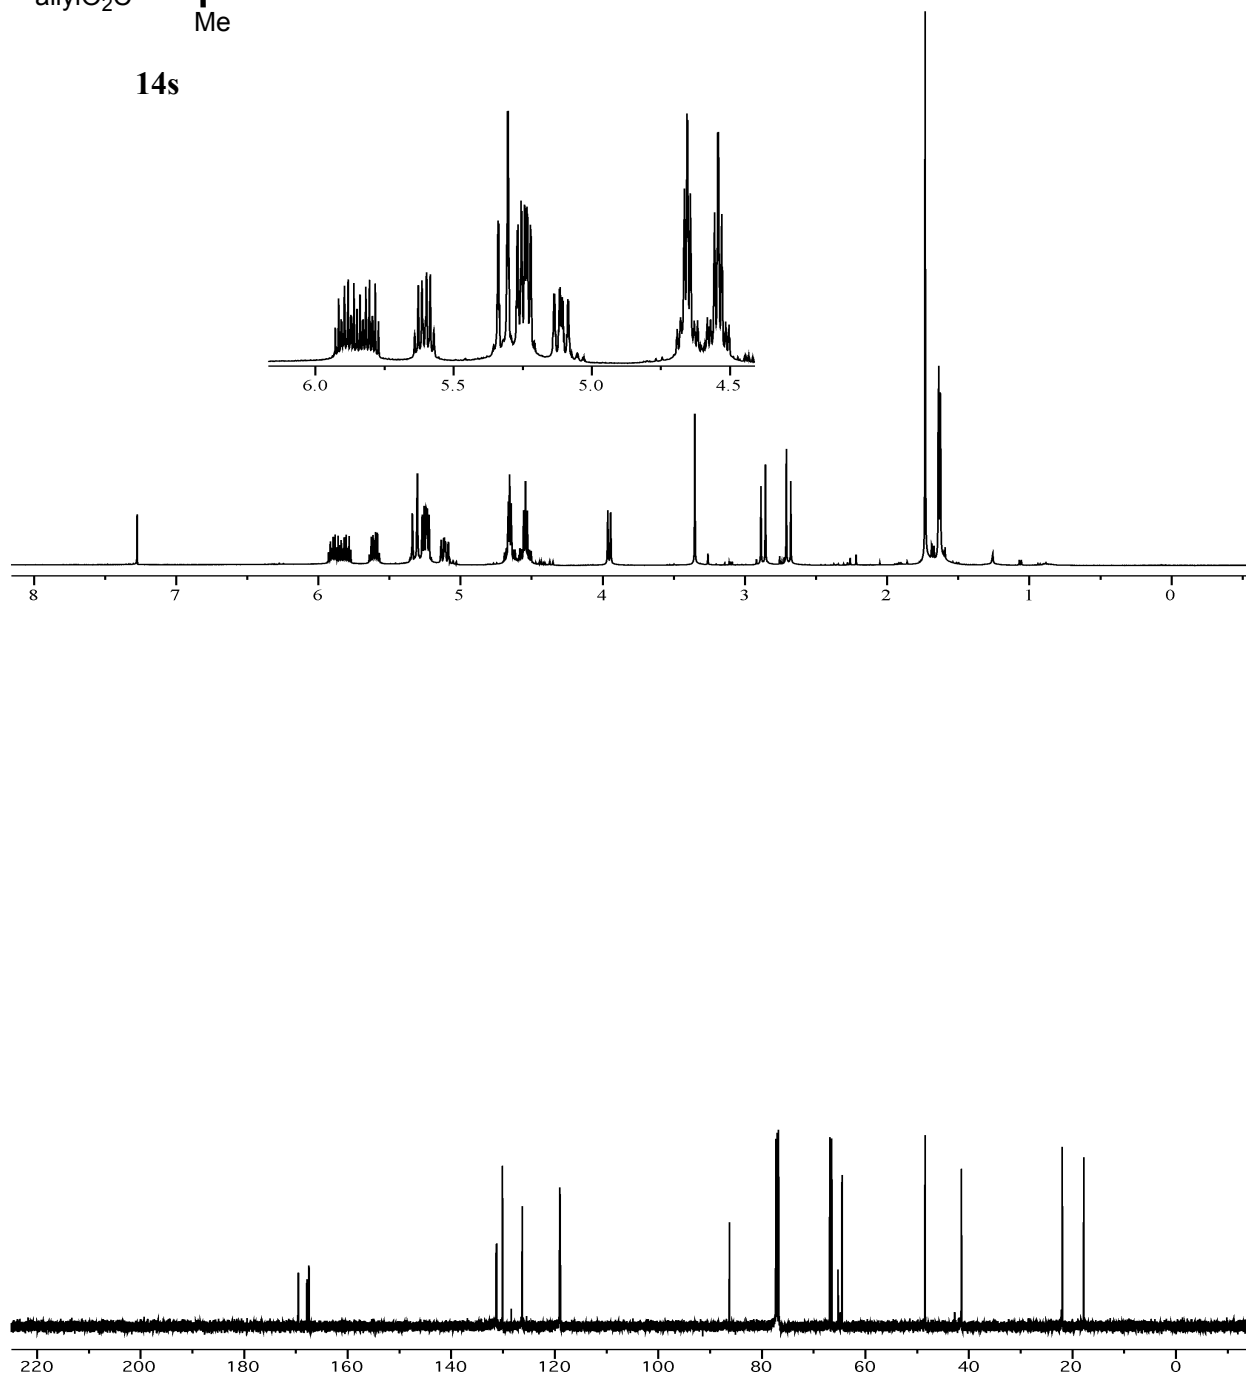 $^1\text{H}$  (500 MHz) and  $^{13}\text{C}$  NMR (125 MHz) spectra of  $\beta$ -lactone **14s** in  $\text{CDCl}_3$

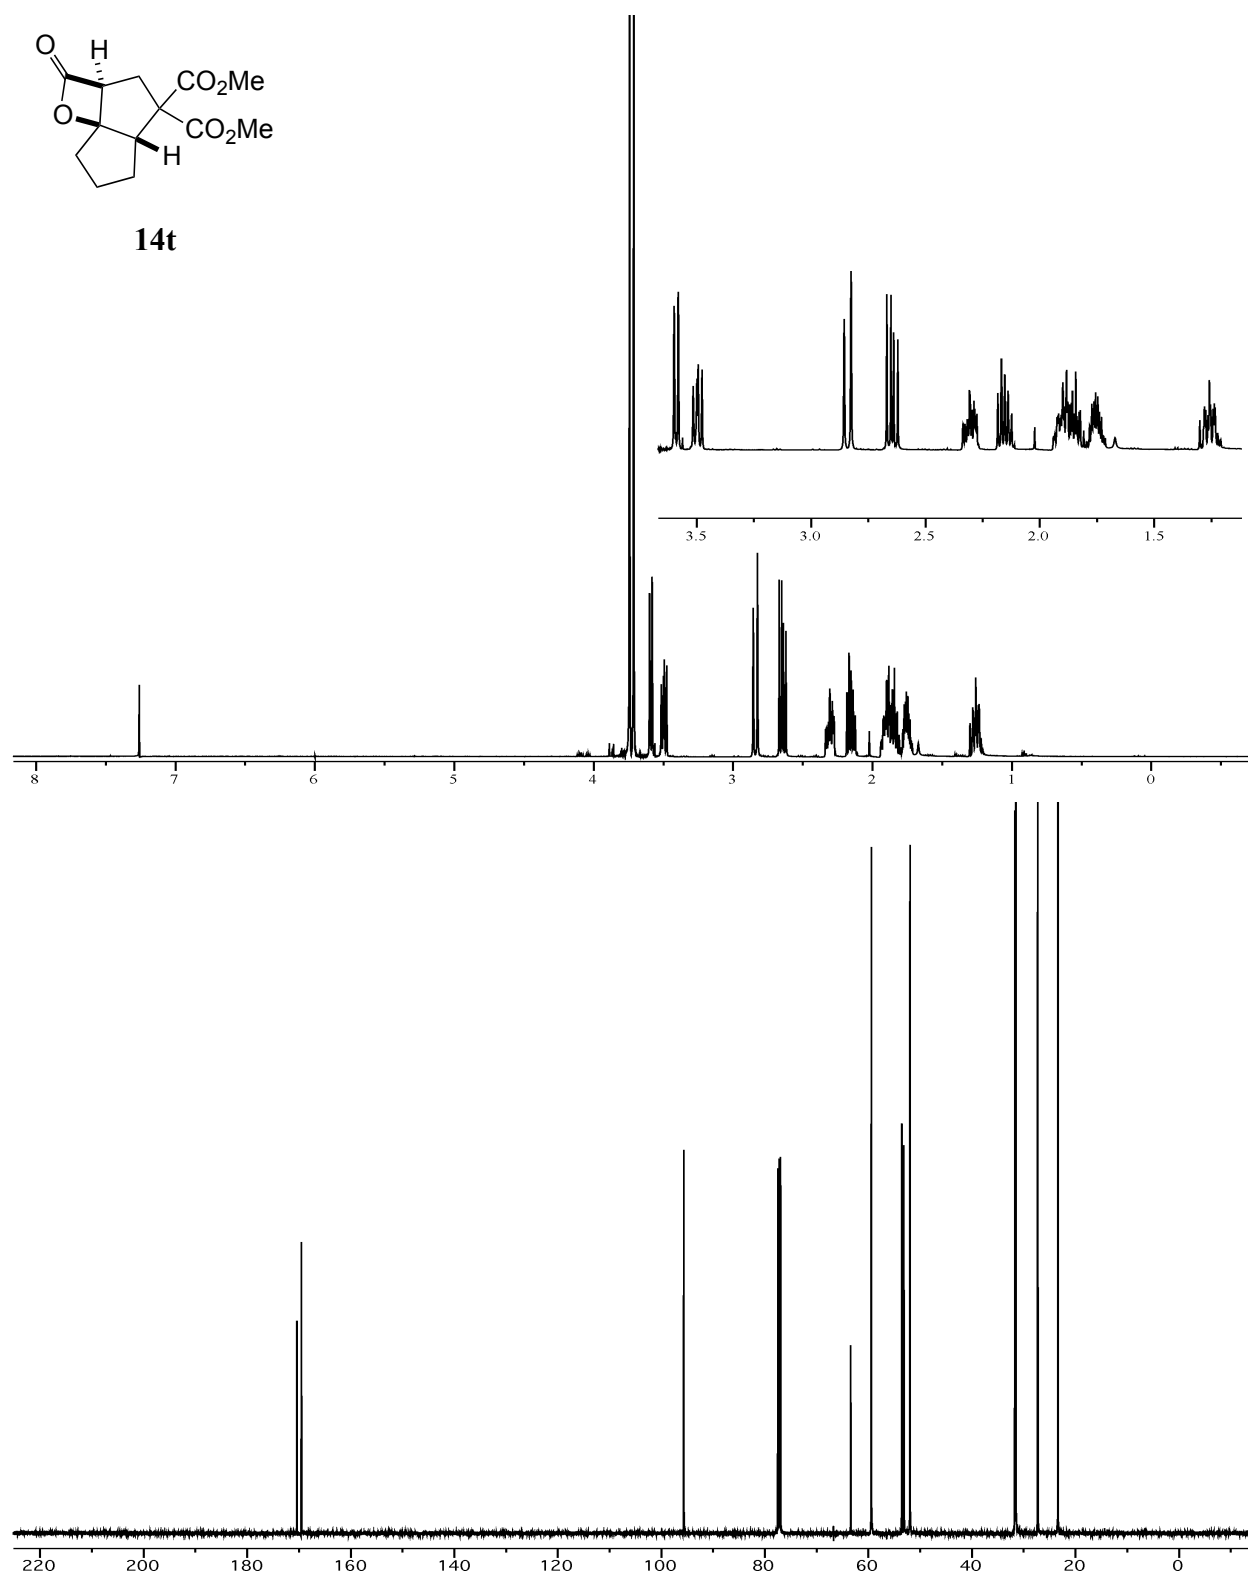

$^1\text{H}$  (500 MHz) and  $^{13}\text{C}$  NMR (125 MHz) spectra of tricyclic  $\beta$ -lactone **14t** in  $\text{CDCl}_3$

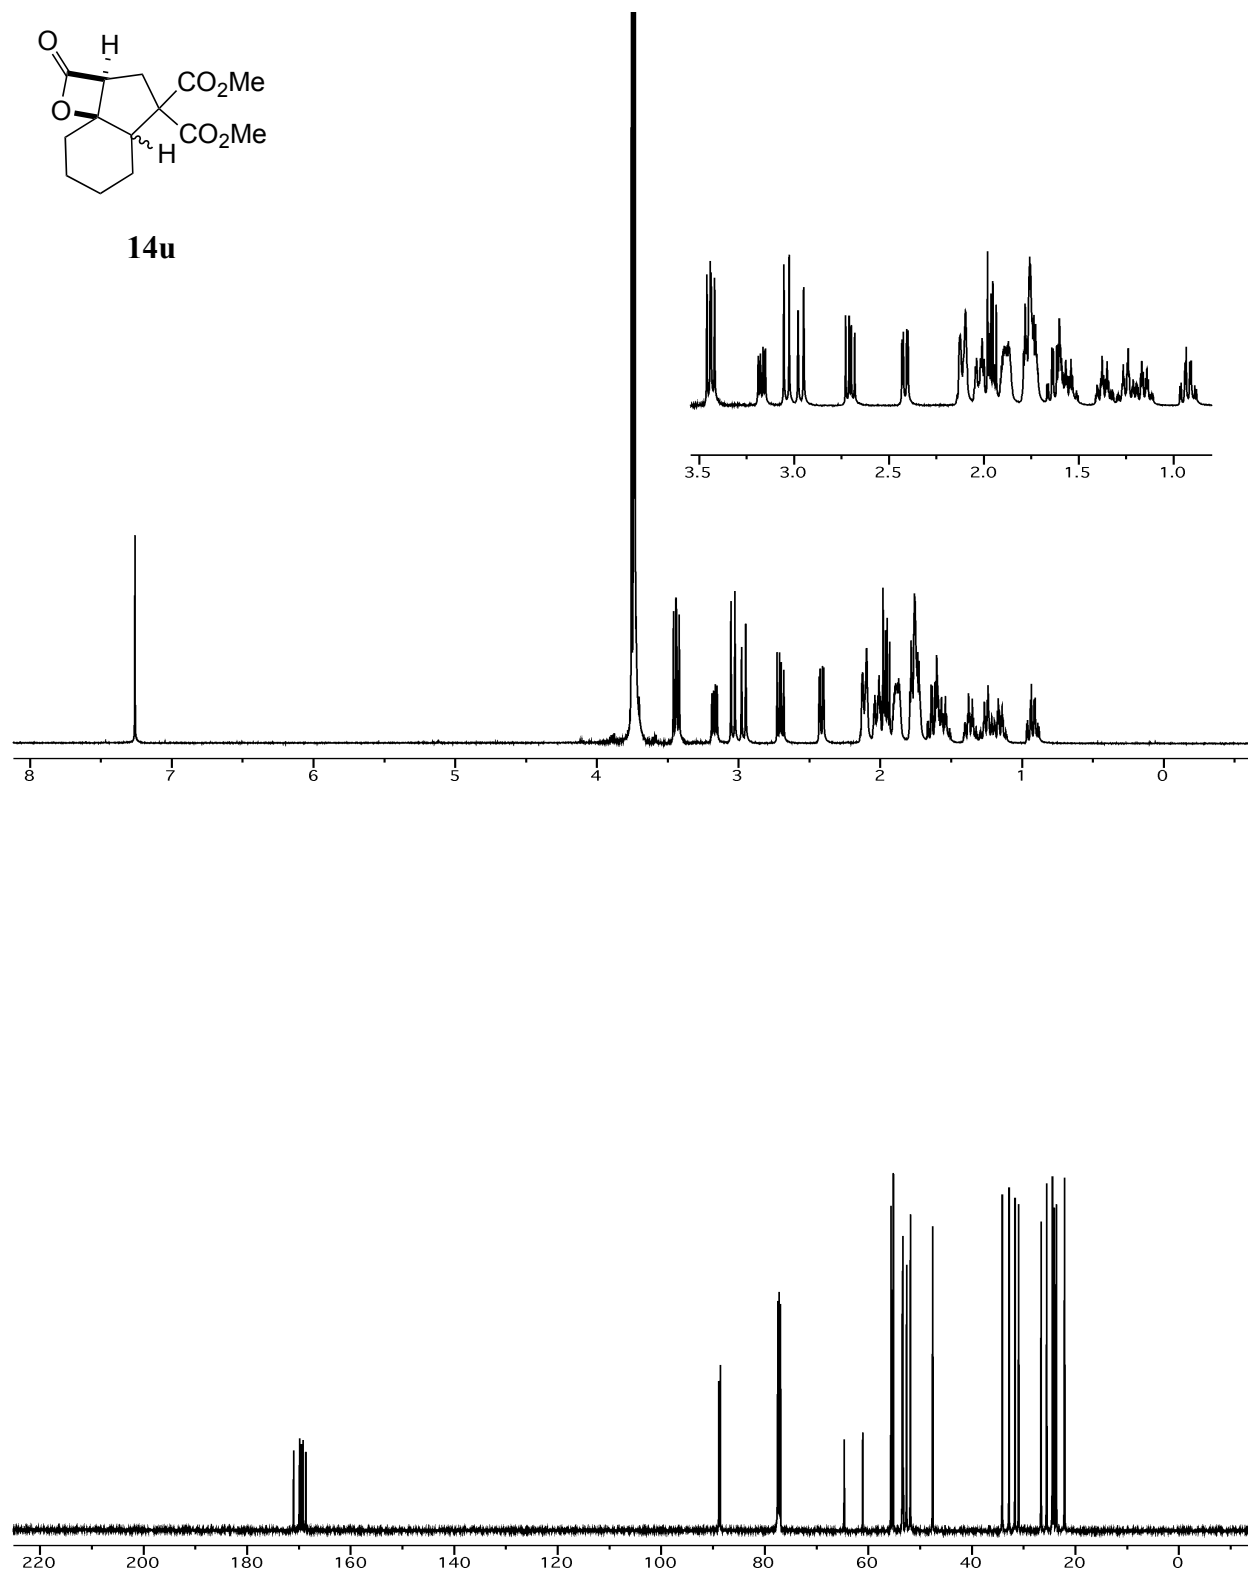

$^1\text{H}$  (500 MHz) and  $^{13}\text{C}$  NMR (125 MHz) spectra of tricyclic  $\beta$ -lactone **14u** in  $\text{CDCl}_3$

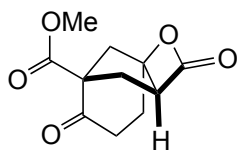**14v**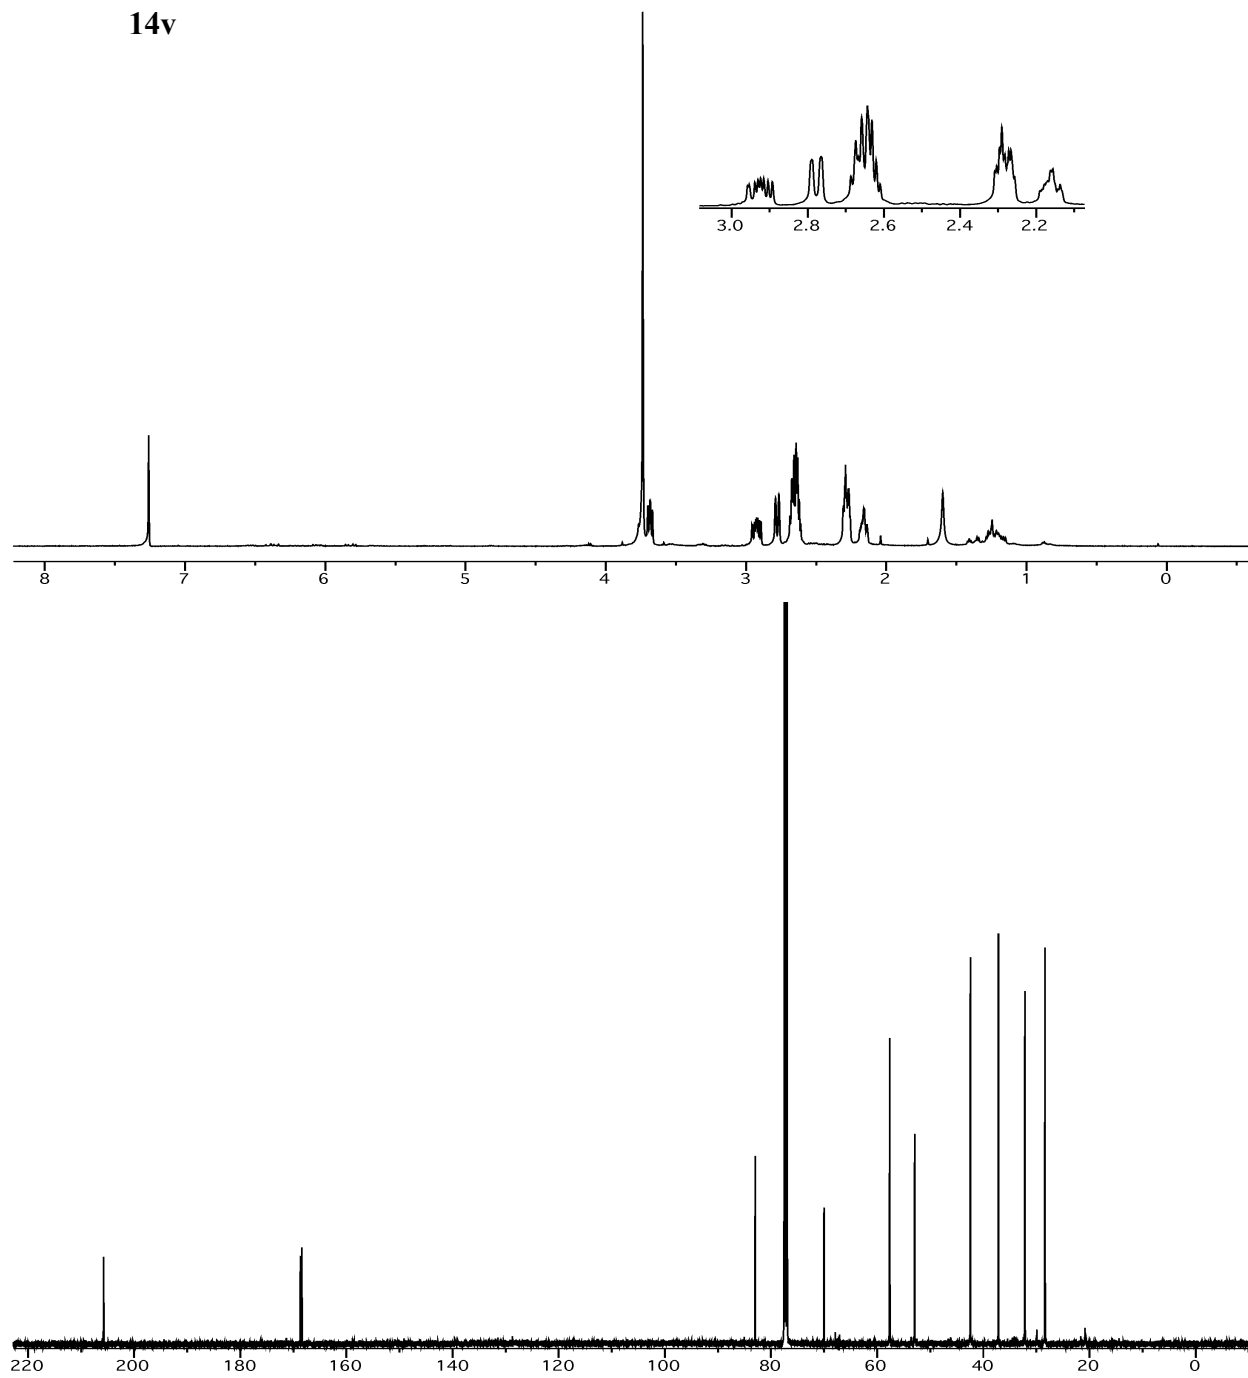 $^1\text{H}$  (500 MHz) and  $^{13}\text{C}$  NMR (125 MHz) spectra of bridged  $\beta$ -lactone **14v** in  $\text{CDCl}_3$

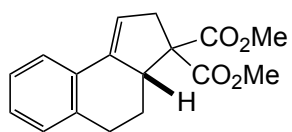**16**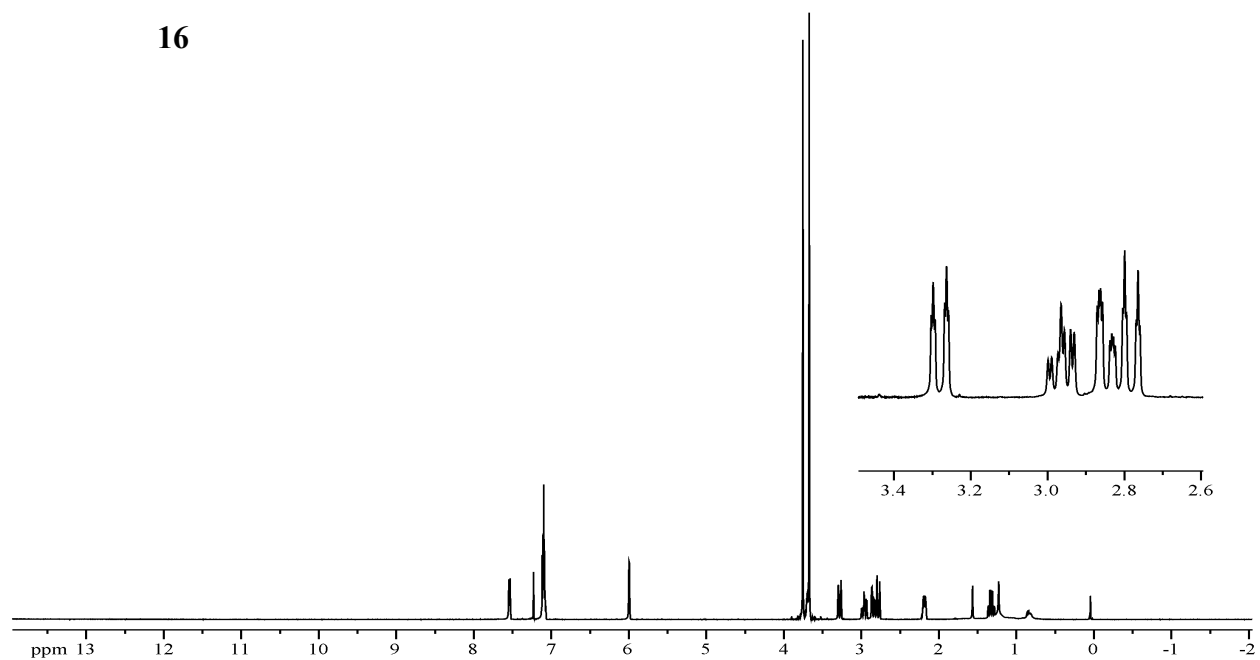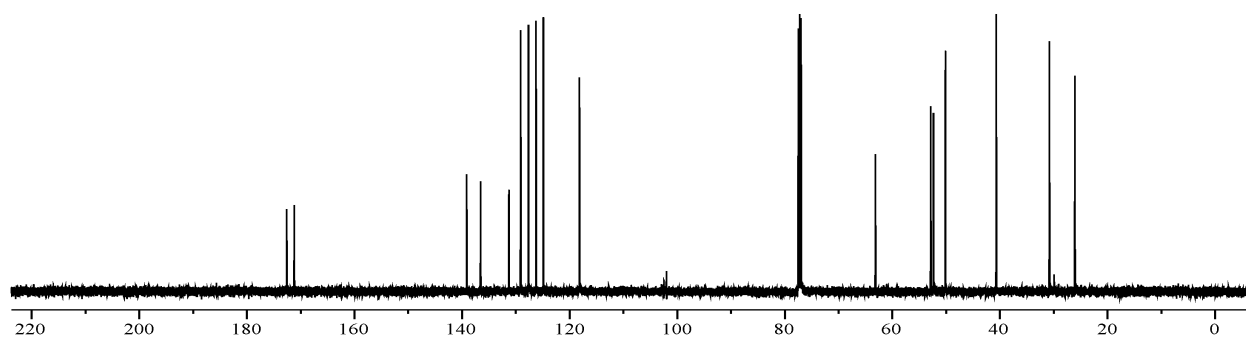

<sup>1</sup>H (500 MHz) and <sup>13</sup>C NMR (125 MHz) spectra of cyclopentene **16** in CDCl<sub>3</sub>

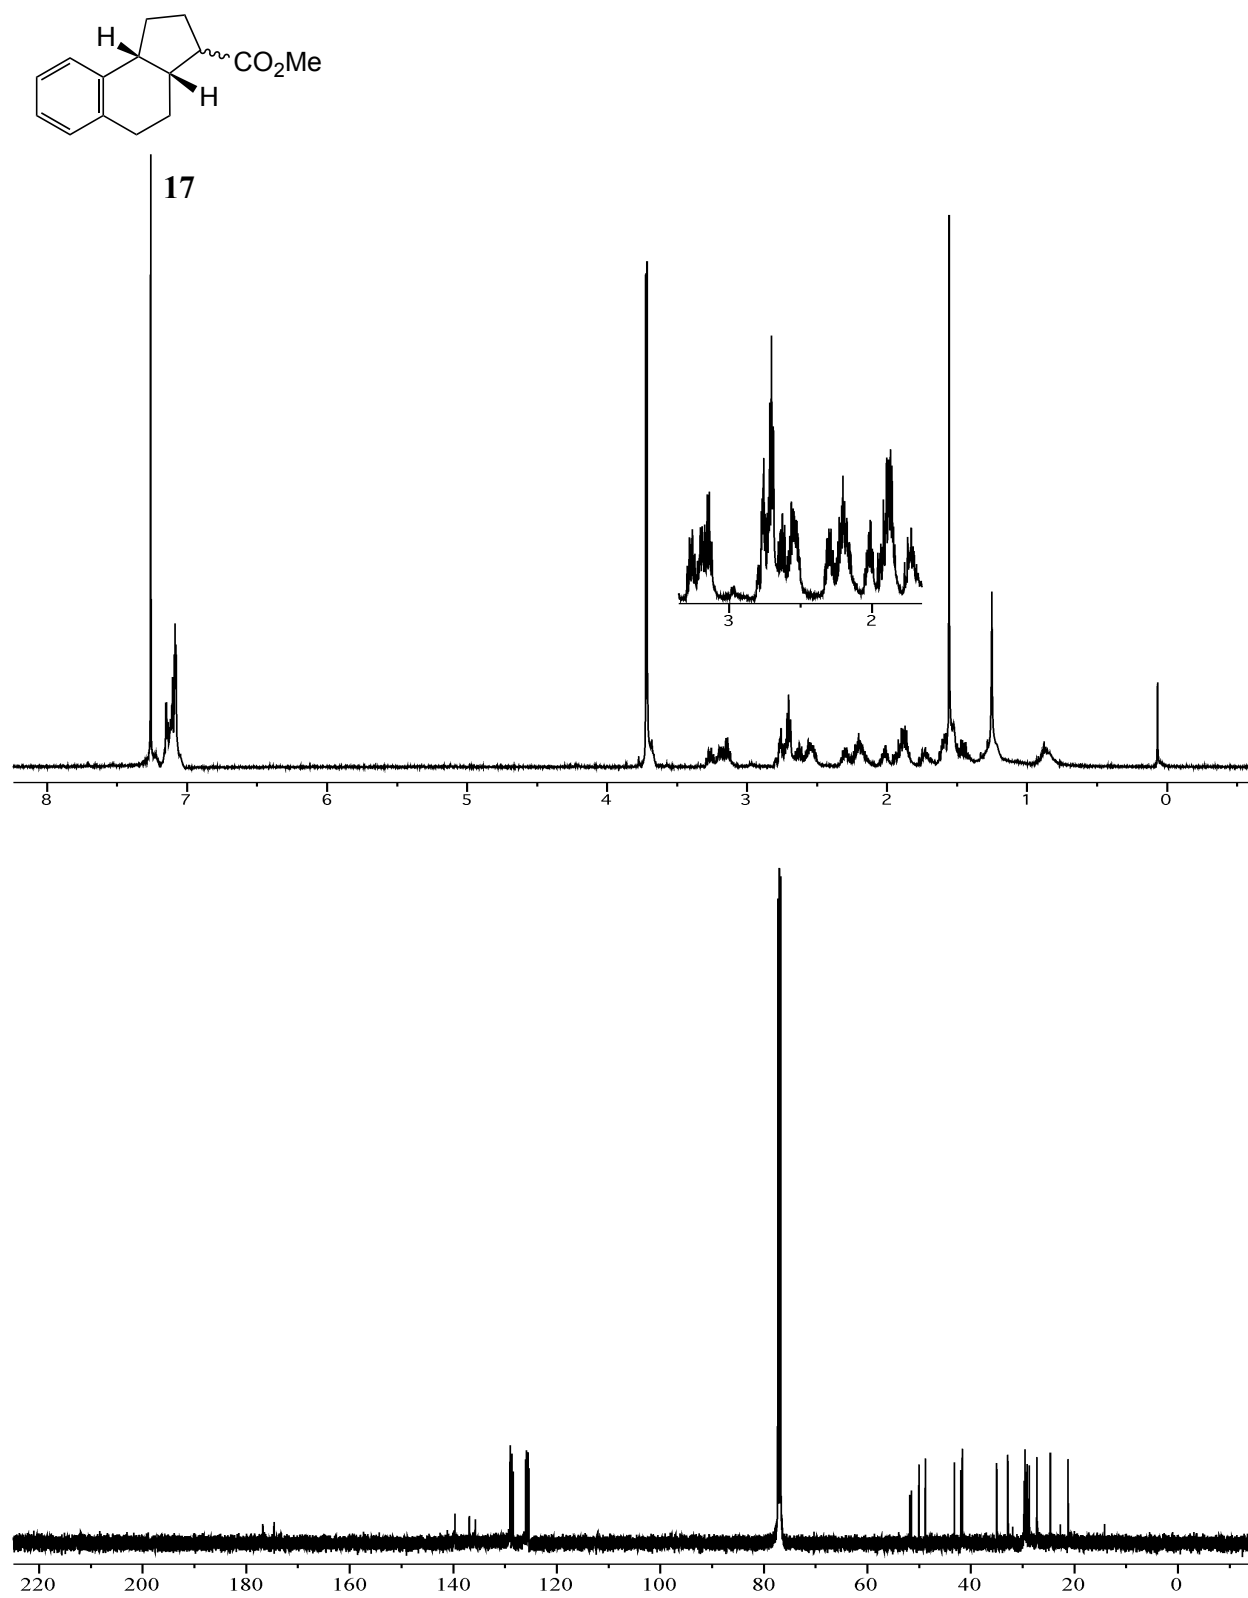

$^1\text{H}$  (500 MHz) and  $^{13}\text{C}$  NMR (125 MHz) spectra of cyclopentane **17** in  $\text{CDCl}_3$



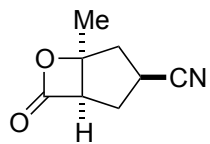**14x**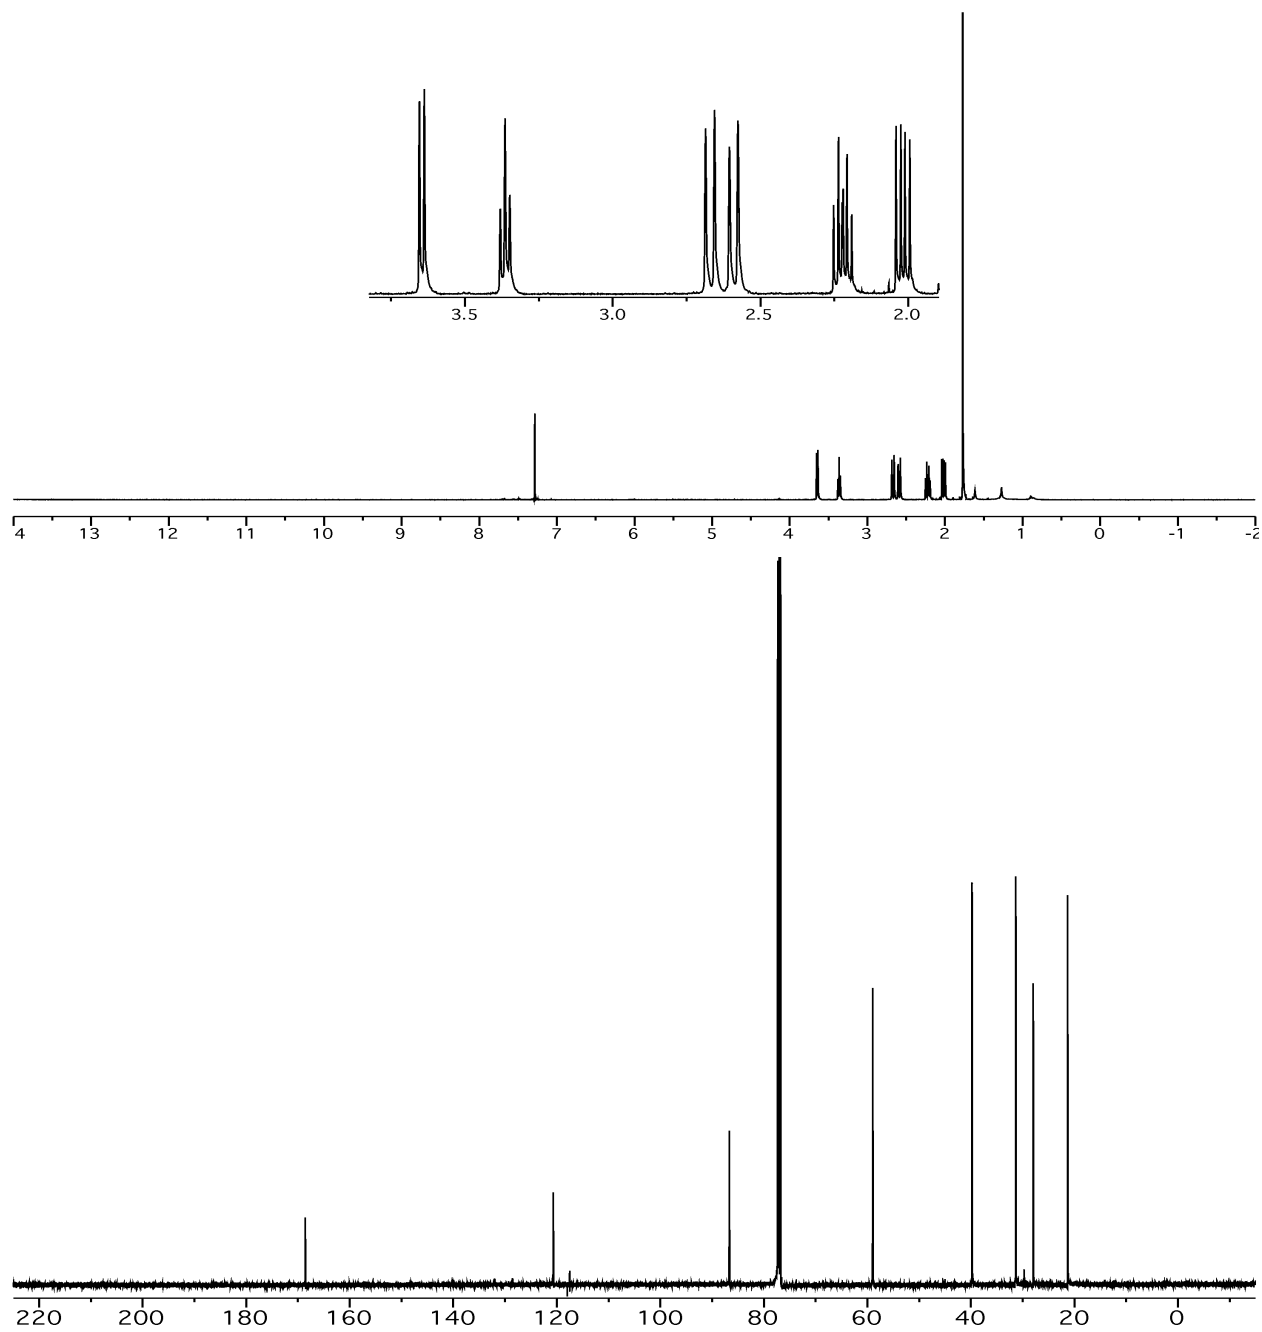 $^1\text{H}$  (500 MHz) and  $^{13}\text{C}$  NMR (125 MHz) spectra of  $\beta$ -lactone **14x** in  $\text{CDCl}_3$

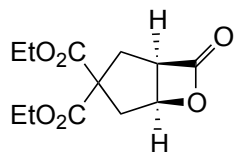**14y**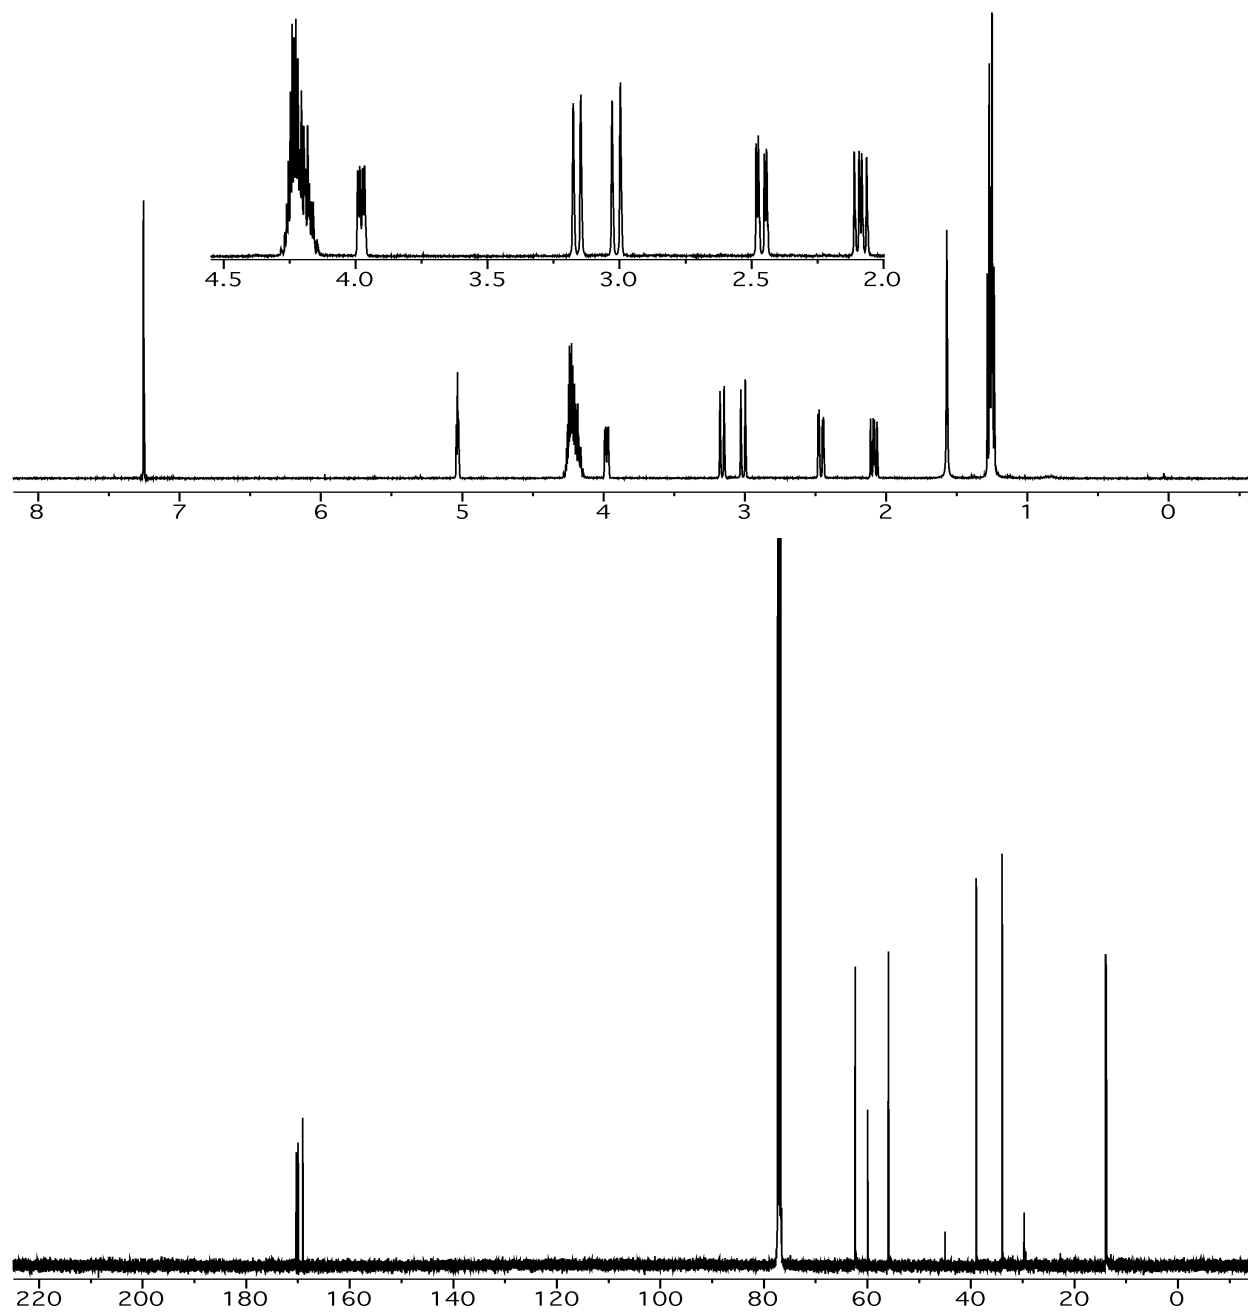 $^1\text{H}$  (500 MHz) and  $^{13}\text{C}$  NMR (125 MHz) spectra of  $\beta$ -lactone **14y** in  $\text{CDCl}_3$

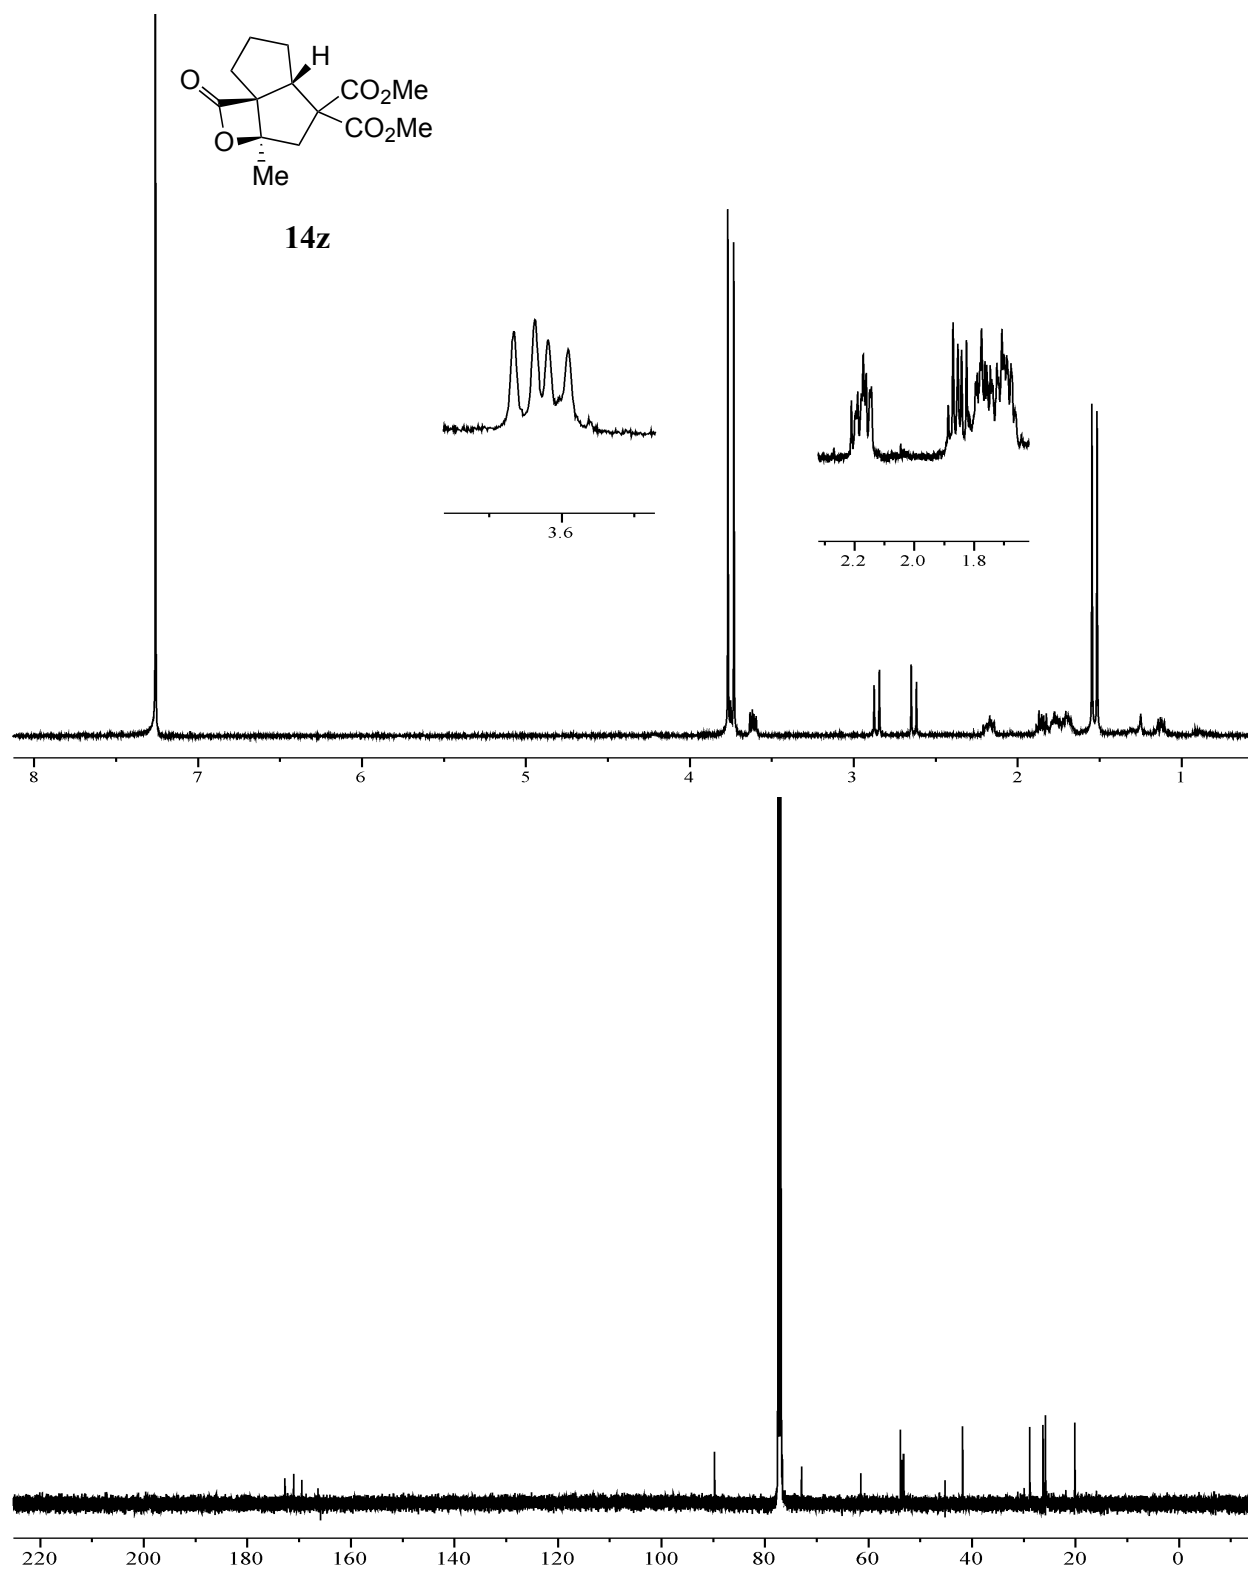

$^1\text{H}$  (500 MHz) and  $^{13}\text{C}$  NMR (125 MHz) spectra of tricyclic  $\beta$ -lactone **14z** in  $\text{CDCl}_3$

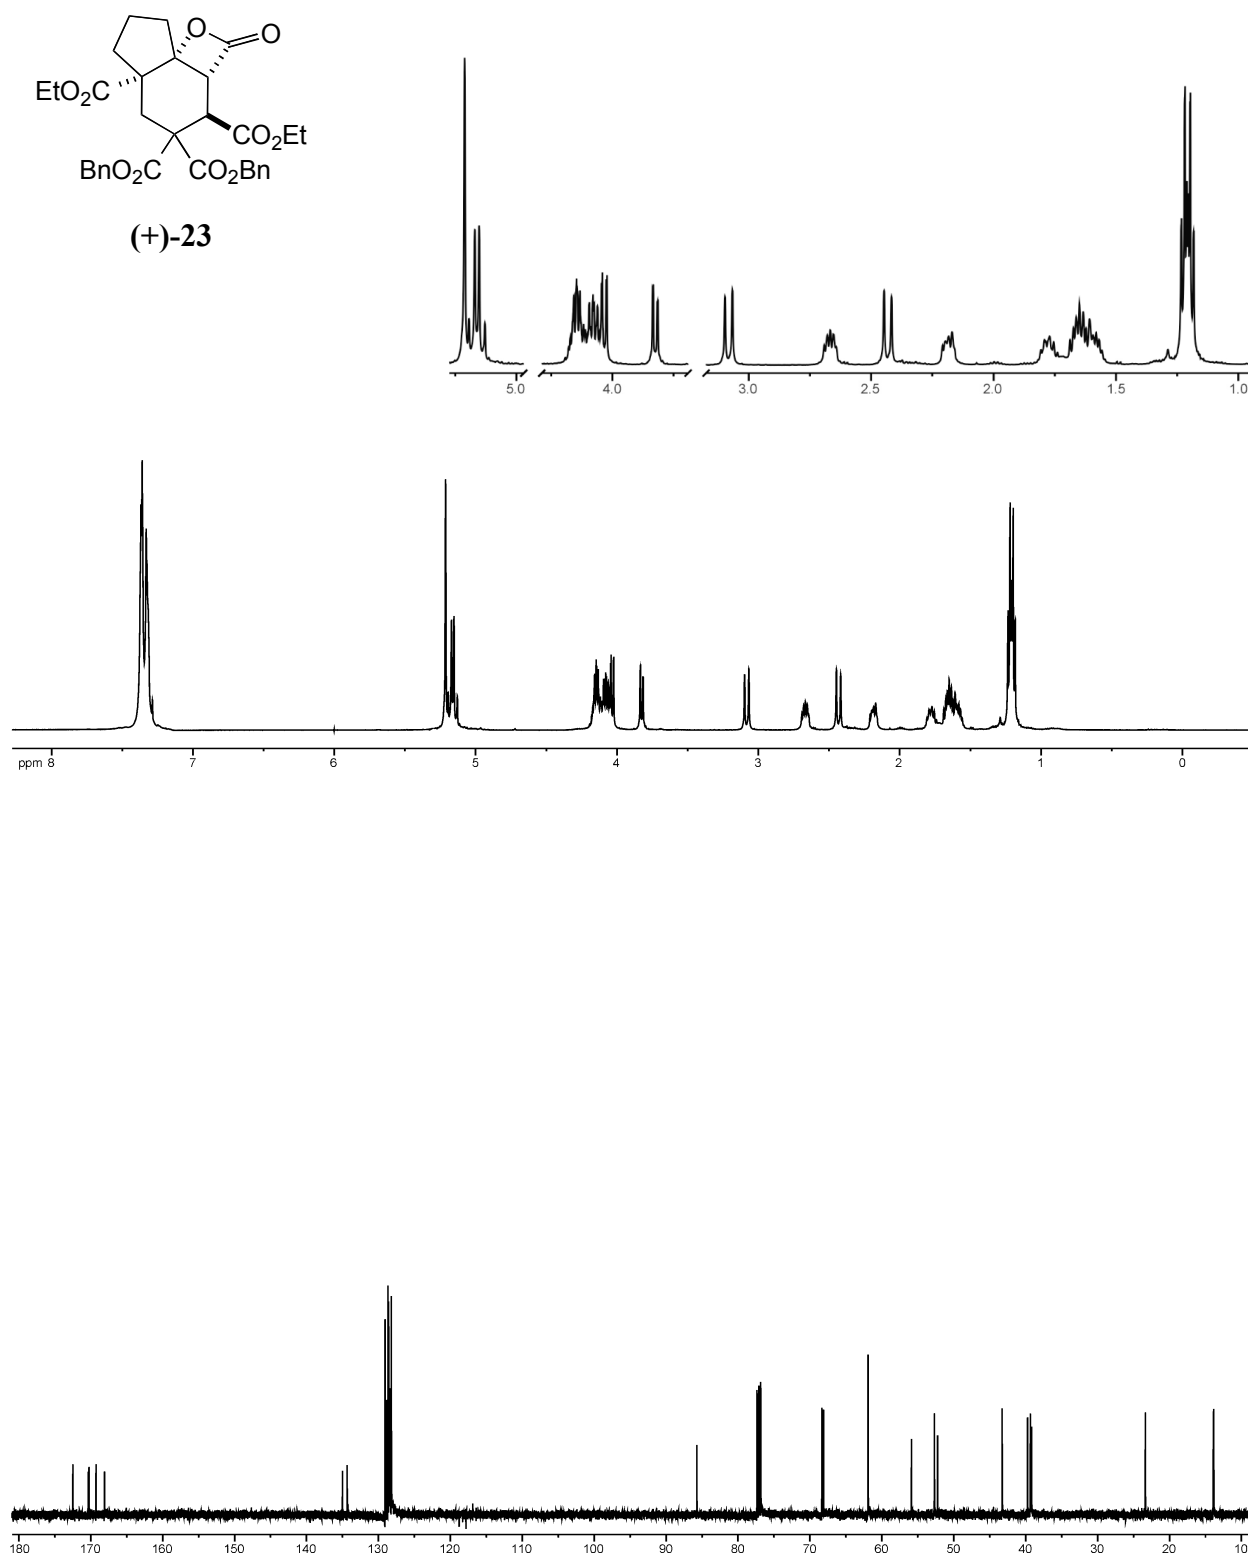

$^1\text{H}$  (500 MHz) and  $^{13}\text{C}$  NMR (125 MHz) spectra of  $\beta$ -lactone (+)-**23** in  $\text{CDCl}_3$

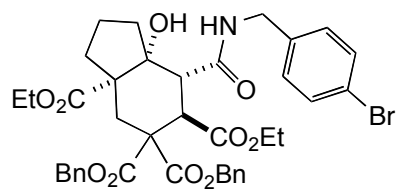**(-)-24**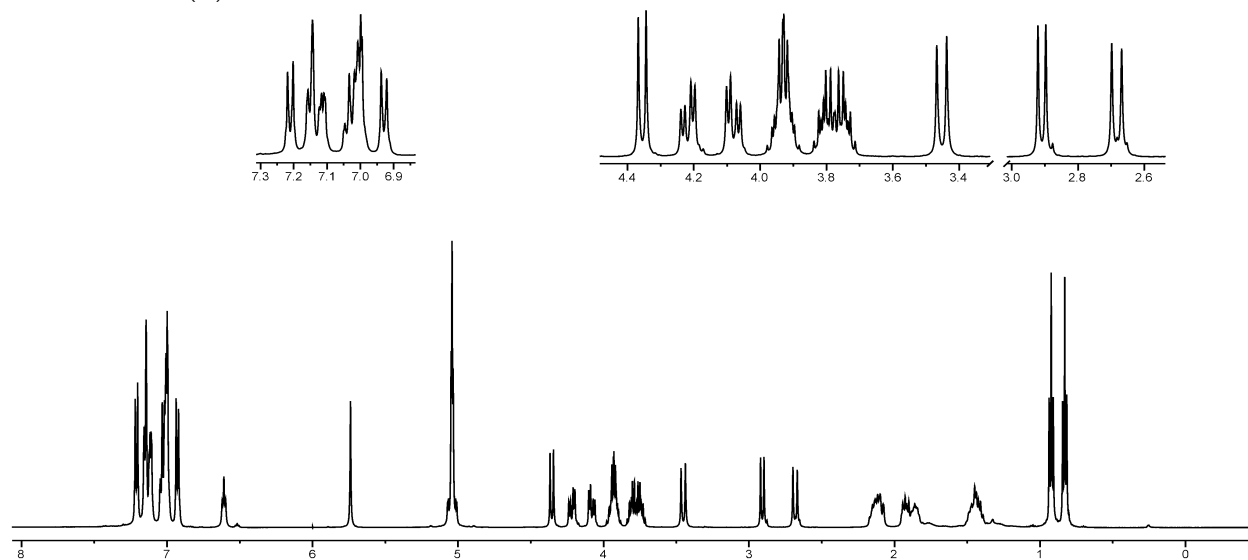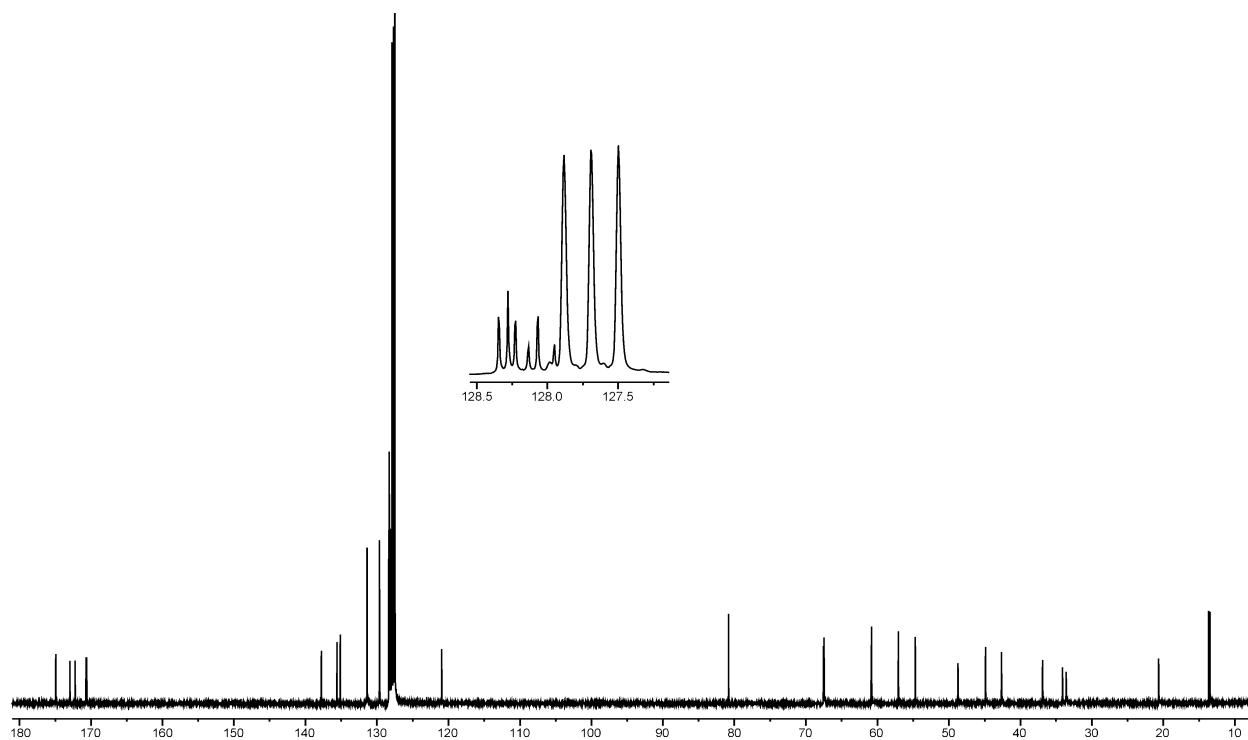

<sup>1</sup>H (500 MHz) and <sup>13</sup>C NMR (125 MHz) spectra of amide (-)-24 in C<sub>6</sub>D<sub>6</sub>

**Figure S1. Chiral GC determination of enantiomeric excess.**

**Determination of enantiomeric excess of  $\beta$ -lactone (+)-14a:**

**Analysis of  $\beta$ -lactone 14a:** Method: CHIRALDEX-BDM GC column,  
13.85 psi, 70-160 °C oven temperature

| Temp (°C) | Rate (°C/min) | Hold time (min) | Total time (min) |
|-----------|---------------|-----------------|------------------|
| 70        | 0.00          | 2.00            | 2.00             |
| 80        | 6.00          | 5.00            | 8.67             |
| 94        | 0.05          | 3.00            | 291.67           |
| 160       | 40.0          | 1.00            | 294.32           |

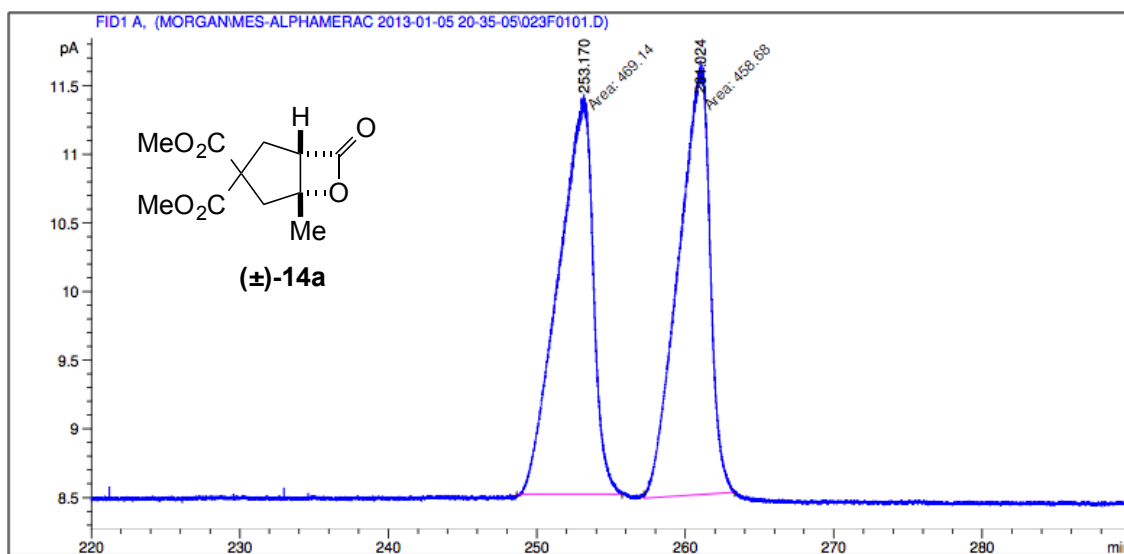

| Peak #   | RetTime [min] | Type | Width [min] | Area [pA*s] | Height [pA] | Area %   |
|----------|---------------|------|-------------|-------------|-------------|----------|
| 1        | 253.170       | MM   | 2.6883      | 469.14023   | 2.90851     | 50.56371 |
| 2        | 261.024       | MM   | 2.4268      | 458.67972   | 3.15007     | 49.43629 |
| Totals : |               |      |             | 927.81995   | 6.05858     |          |

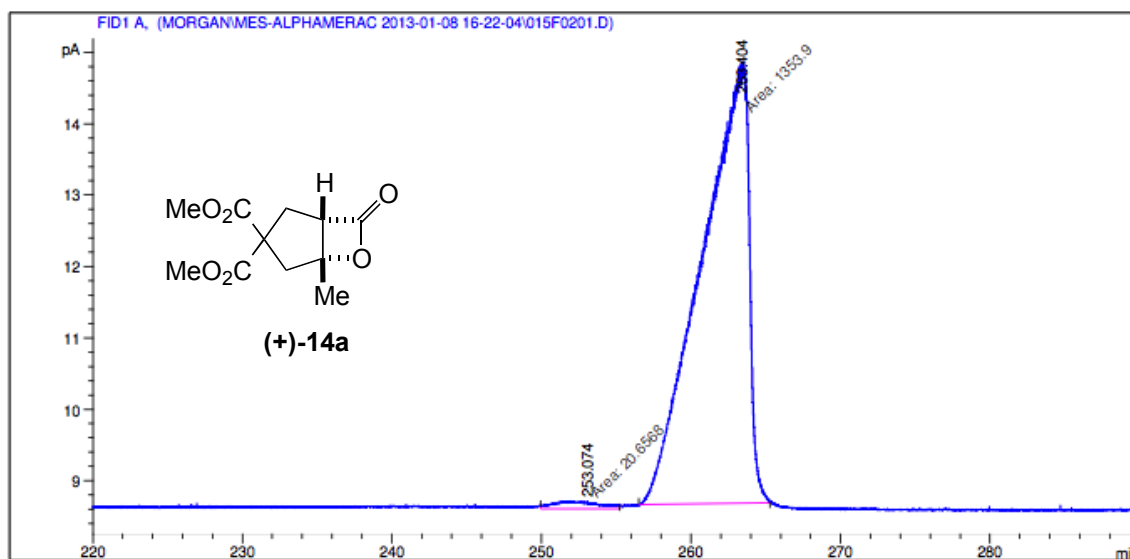

| Peak # | RetTime [min] | Type | Width [min] | Area [pA*s] | Height [pA] | Area %   |
|--------|---------------|------|-------------|-------------|-------------|----------|
| 1      | 253.074       | MM   | 3.0844      | 20.65680    | 1.11619e-1  | 1.50280  |
| 2      | 263.404       | MM   | 3.6433      | 1353.90149  | 6.19348     | 98.49720 |

Totals : 1374.55829 6.30510

### For 1 gram scale reaction:

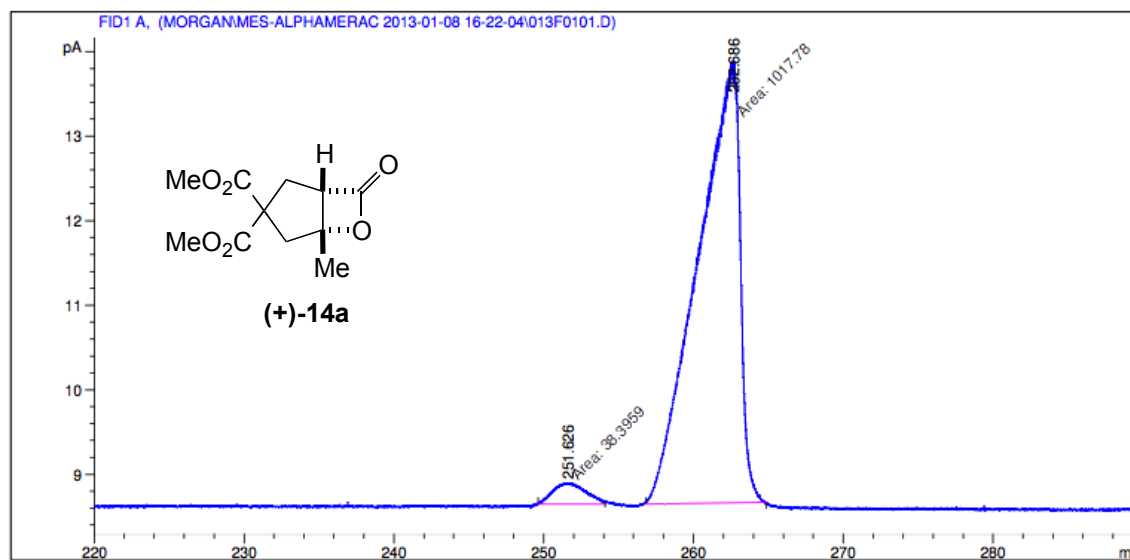

| Peak # | RetTime [min] | Type | Width [min] | Area [pA*s] | Height [pA] | Area %   |
|--------|---------------|------|-------------|-------------|-------------|----------|
| 1      | 251.626       | MM   | 2.4909      | 38.39586    | 2.56910e-1  | 3.63537  |
| 2      | 262.686       | MM   | 3.2436      | 1017.77905  | 5.22972     | 96.36463 |

Totals : 1056.17491 5.48663

## Figure S2. Chiral HPLC determinations of enantiomeric excess.

### Determination of enantiomeric excess of $\beta$ -lactone 14c:

**Chiral HPLC Analysis of  $\beta$ -lactone (+)-14c:** Chiralcel IA column: hexanes:*i*PrOH = 92:08, flow rate 0.5 mL/min,  $\lambda$  = 210 nm:  $t_{\text{major}}$  = 17.28 min,  $t_{\text{minor}}$  = 21.29 min; 95% *ee*.

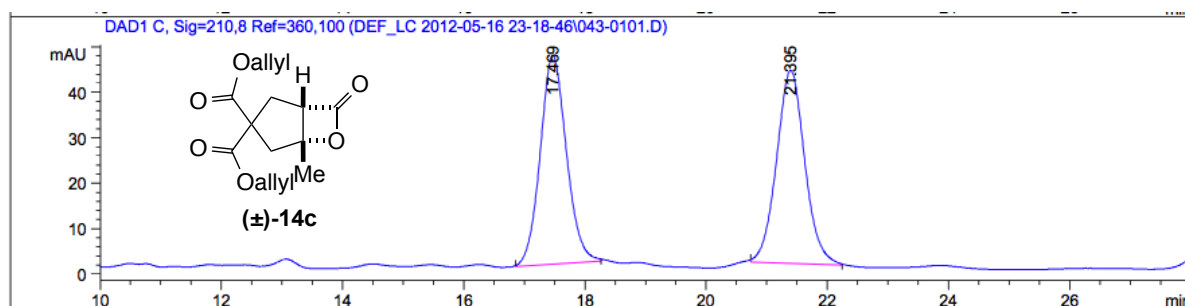

Signal 3: DAD1 C, Sig=210,8 Ref=360,100

| Peak # | RetTime [min] | Type | Width [min] | Area [mAU*s] | Height [mAU] | Area %  |
|--------|---------------|------|-------------|--------------|--------------|---------|
| 1      | 17.469        | BB   | 0.4584      | 1380.03906   | 45.94238     | 50.0339 |
| 2      | 21.395        | BB   | 0.4922      | 1378.16772   | 42.51847     | 49.9661 |

Totals : 2758.20679 88.46085

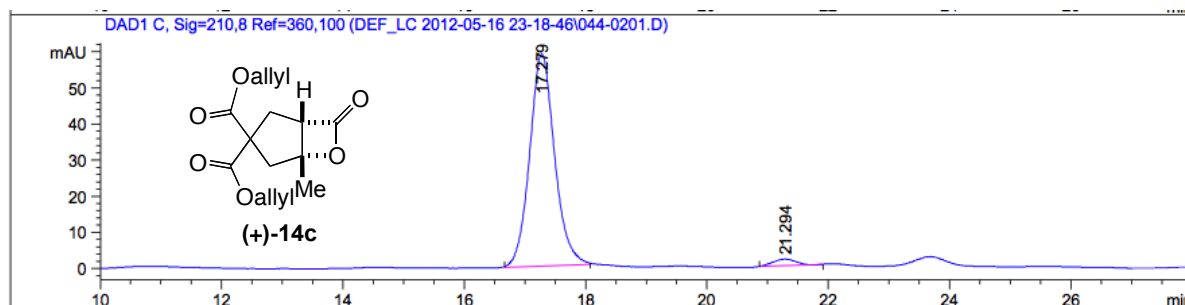

Signal 3: DAD1 C, Sig=210,8 Ref=360,100

| Peak # | RetTime [min] | Type | Width [min] | Area [mAU*s] | Height [mAU] | Area %  |
|--------|---------------|------|-------------|--------------|--------------|---------|
| 1      | 17.279        | BB   | 0.4330      | 1679.59167   | 58.83675     | 97.3688 |
| 2      | 21.294        | BB   | 0.3267      | 45.38679     | 1.80935      | 2.6312  |

Totals : 1724.97847 60.64610



### Determination of enantiomeric excess of $\beta$ -lactone (+)-14d:

**Chiral HPLC Analysis of  $\beta$ -lactone (+)-14d:** Chiralcel OD-H column: hexanes:*i*PrOH = 95:05, flow rate 1.0 mL/min,  $\lambda = 210$  nm:  $t_{\text{major}} = 36.58$  min,  $t_{\text{minor}} = 45.57$  min,; 98% *ee*.

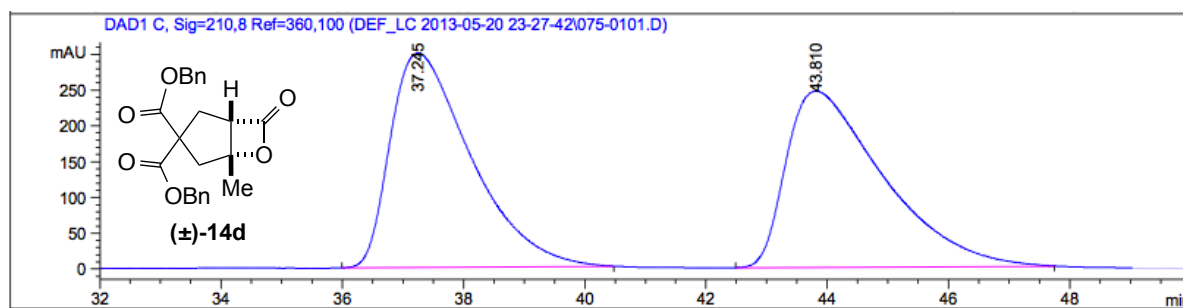

| Peak #   | RetTime [min] | Type | Width [min] | Area [mAU*s] | Height [mAU] | Area %  |
|----------|---------------|------|-------------|--------------|--------------|---------|
| 1        | 37.245        | BB   | 1.3899      | 2.77147e4    | 299.96042    | 50.2328 |
| 2        | 43.810        | BB   | 1.6070      | 2.74579e4    | 246.23305    | 49.7672 |
| Totals : |               |      |             | 5.51726e4    | 546.19347    |         |

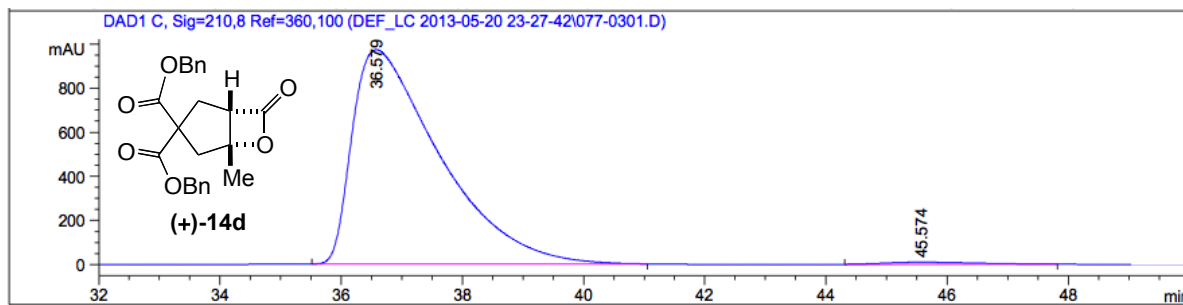

| Peak #   | RetTime [min] | Type | Width [min] | Area [mAU*s] | Height [mAU] | Area %  |
|----------|---------------|------|-------------|--------------|--------------|---------|
| 1        | 36.579        | BB   | 1.4738      | 9.74570e4    | 971.97943    | 98.9620 |
| 2        | 45.574        | BB   | 1.2386      | 1022.21277   | 9.75475      | 1.0380  |
| Totals : |               |      |             | 9.84792e4    | 981.73418    |         |

### Determination of enantiomeric excess of $\beta$ -lactone (+)-14e:

**Chiral HPLC Analysis of  $\beta$ -lactone 14e:** Chiralcel AD-H column: hexanes:*i*PrOH = 95:05, flow rate 0.5 mL/min,  $\lambda$  = 210 nm:  $t_{\text{minor}}$  = 52.02 min,  $t_{\text{major}}$  = 67.37 min; 95% *ee*.

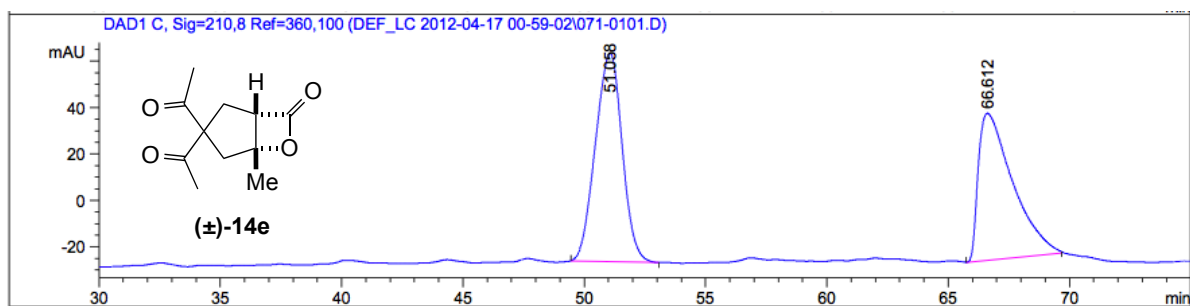

Signal 3: DAD1 C, Sig=210,8 Ref=360,100

| Peak # | RetTime [min] | Type | Width [min] | Area [mAU*s] | Height [mAU] | Area %  |
|--------|---------------|------|-------------|--------------|--------------|---------|
| 1      | 51.058        | BB   | 1.1917      | 6904.16602   | 89.93245     | 52.5774 |
| 2      | 66.612        | BB   | 1.3835      | 6227.27295   | 63.31452     | 47.4226 |

Totals : 1.31314e4 153.24697

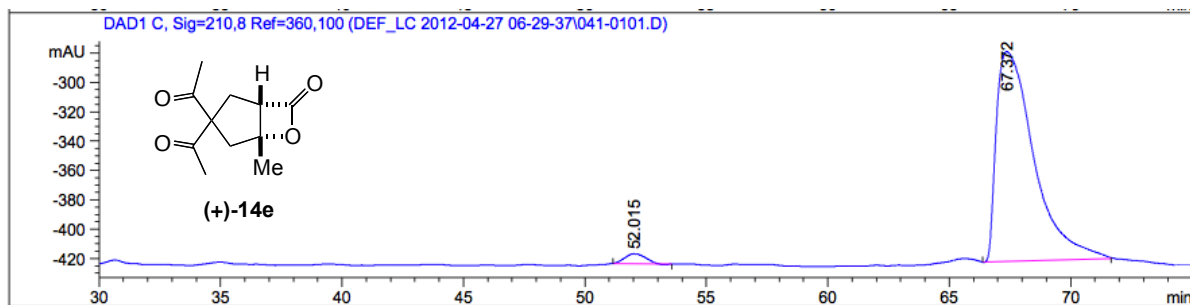

Signal 3: DAD1 C, Sig=210,8 Ref=360,100

| Peak # | RetTime [min] | Type | Width [min] | Area [mAU*s] | Height [mAU] | Area %  |
|--------|---------------|------|-------------|--------------|--------------|---------|
| 1      | 52.015        | BB   | 0.7163      | 397.05292    | 6.74918      | 2.5066  |
| 2      | 67.372        | BB   | 1.6573      | 1.54434e4    | 143.07353    | 97.4934 |

Totals : 1.58405e4 149.82271

### Determination of enantiomeric excess of $\beta$ -lactone (+)-14k:

**Chiral HPLC Analysis of  $\beta$ -lactone 14k:** Chiralcel OD-H column: hexanes:*i*PrOH = 90:10, flow rate 0.5 mL/min,  $\lambda$  = 210 nm:  $t_{\text{major}}$  = 22.38 min,  $t_{\text{minor}}$  = 29.05 min; 94% *ee*.

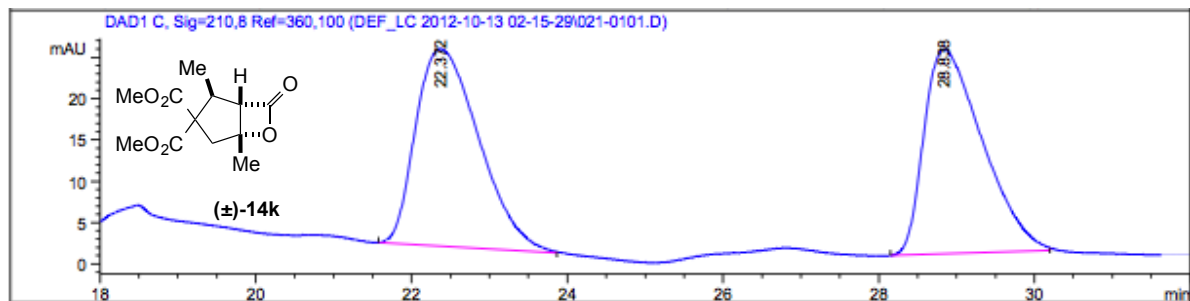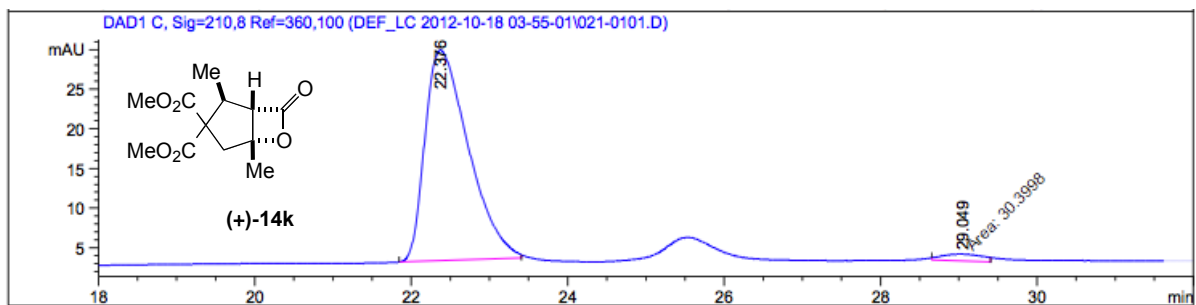

### Determination of enantiomeric excess of $\beta$ -lactone (+)-14l:

**Chiral HPLC Analysis of  $\beta$ -lactone (+)-14l:** Chiralcel AD-H column: hexanes:*i*PrOH = 88:12, flow rate 0.9 mL/min,  $\lambda = 230$  nm:  $t_{\text{major}} = 9.15$  min,  $t_{\text{minor}} = 16.24$  min; 90% *ee*.

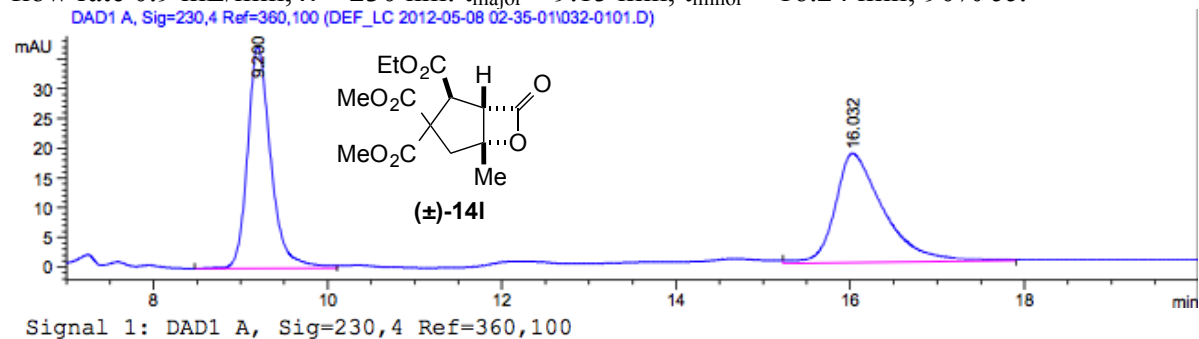

| Peak # | RetTime [min] | Type | Width [min] | Area [mAU*s] | Height [mAU] | Area %  |
|--------|---------------|------|-------------|--------------|--------------|---------|
| 1      | 9.200         | VV   | 0.2818      | 693.80536    | 37.16629     | 49.2484 |
| 2      | 16.032        | VB   | 0.5660      | 714.98303    | 18.37302     | 50.7516 |

Totals : 1408.78839 55.53931

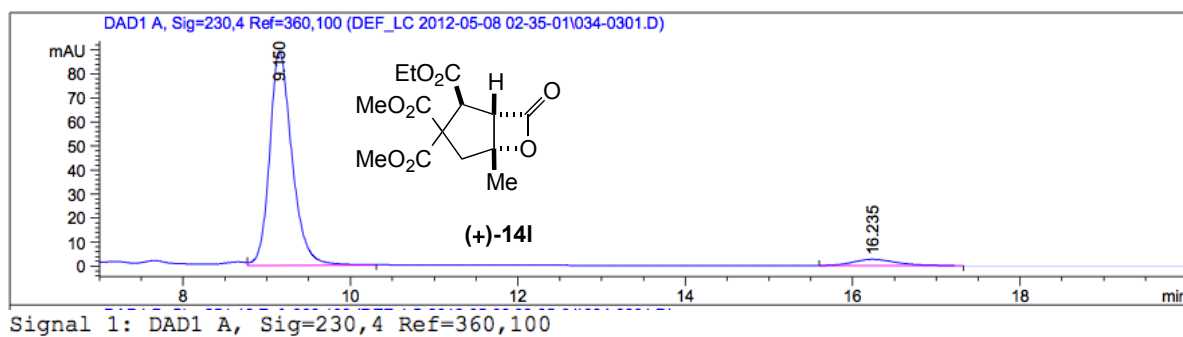

| Peak # | RetTime [min] | Type | Width [min] | Area [mAU*s] | Height [mAU] | Area %  |
|--------|---------------|------|-------------|--------------|--------------|---------|
| 1      | 9.150         | VB   | 0.2819      | 1657.60339   | 88.73829     | 94.8448 |
| 2      | 16.235        | BB   | 0.5305      | 90.09774     | 2.56041      | 5.1552  |

Totals : 1747.70113 91.29870



### Determination of enantiomeric excess of $\beta$ -lactone (+)-14m:

**Chiral HPLC Analysis of (+)- $\beta$ -lactone 14m:** Chiralcel AD-H column: hexanes:*i*PrOH = 70:30, flow rate 0.5 mL/min,  $\lambda$  = 210 nm:  $t_{\text{major}}$  = 12.0 min,  $t_{\text{minor}}$  = 13.1 min; 99% *ee*.

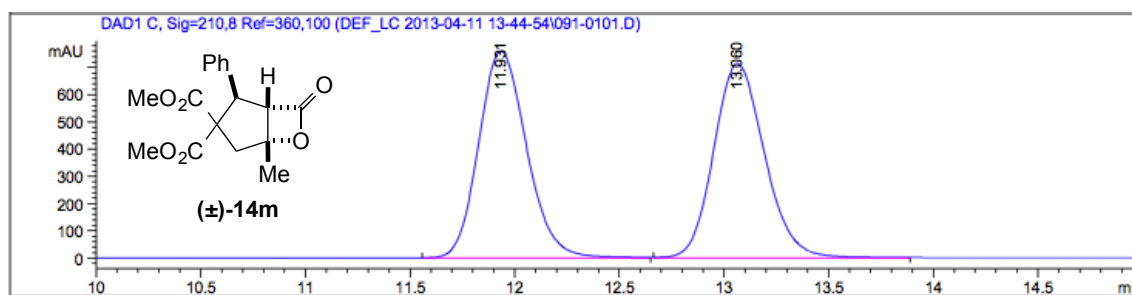

Signal 3: DAD1 C, Sig=210,8 Ref=360,100

| Peak # | RetTime [min] | Type | Width [min] | Area [mAU*s] | Height [mAU] | Area %  |
|--------|---------------|------|-------------|--------------|--------------|---------|
| 1      | 11.931        | BB   | 0.2474      | 1.20770e4    | 760.01733    | 50.0964 |
| 2      | 13.060        | BB   | 0.2606      | 1.20305e4    | 713.89355    | 49.9036 |

Totals : 2.41075e4 1473.91089

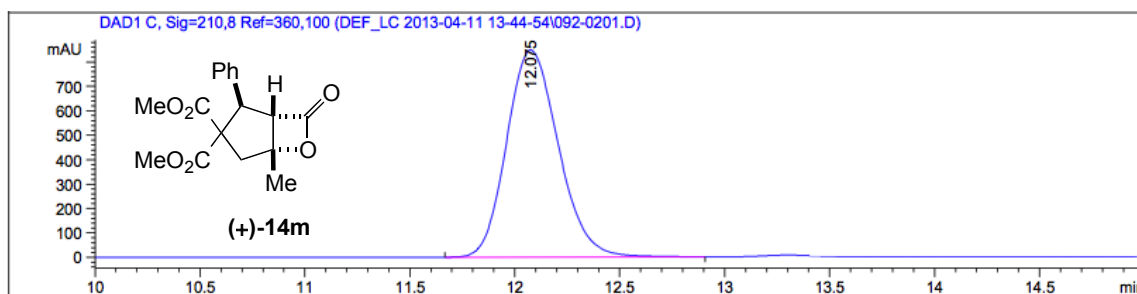

Signal 3: DAD1 C, Sig=210,8 Ref=360,100

| Peak # | RetTime [min] | Type | Width [min] | Area [mAU*s] | Height [mAU] | Area %   |
|--------|---------------|------|-------------|--------------|--------------|----------|
| 1      | 12.075        | BB   | 0.2685      | 1.45686e4    | 847.91510    | 100.0000 |

Totals : 1.45686e4 847.91510

### Determination of enantiomeric excess of $\beta$ -lactone (+)-14p:

**Chiral HPLC Analysis of  $\beta$ -lactone 14p:** Chiralcel AD-H column: hexanes:*i*PrOH = 70:30, flow rate 0.5 mL/min,  $\lambda = 210$  nm:  $t_{\text{major}} = 22.22$  min,  $t_{\text{minor}} = 27.07$  min; 99% *ee*.

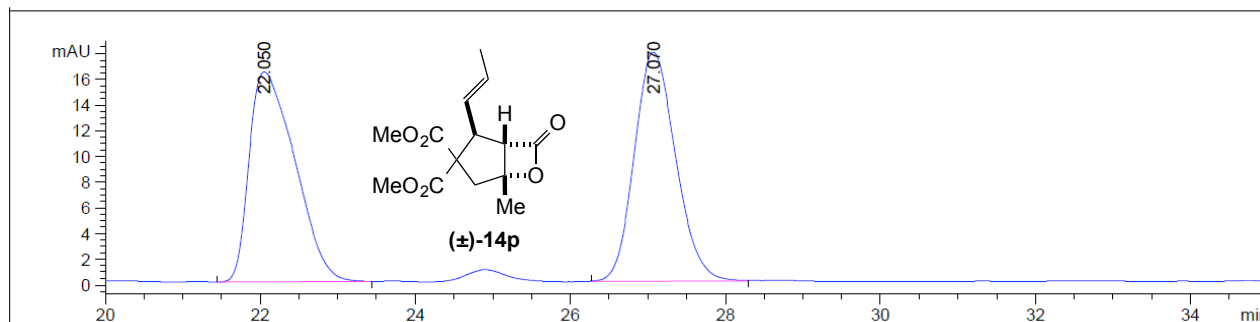

| Peak # | RetTime [min] | Type | Width [min] | Area [mAU*s] | Height [mAU] | Area %  |
|--------|---------------|------|-------------|--------------|--------------|---------|
| 1      | 22.050        | BB   | 0.6828      | 2204.23926   | 53.93431     | 50.5226 |
| 2      | 27.070        | BB   | 0.5737      | 2158.63965   | 58.60735     | 49.4774 |

Totals : 4362.87891 112.54166

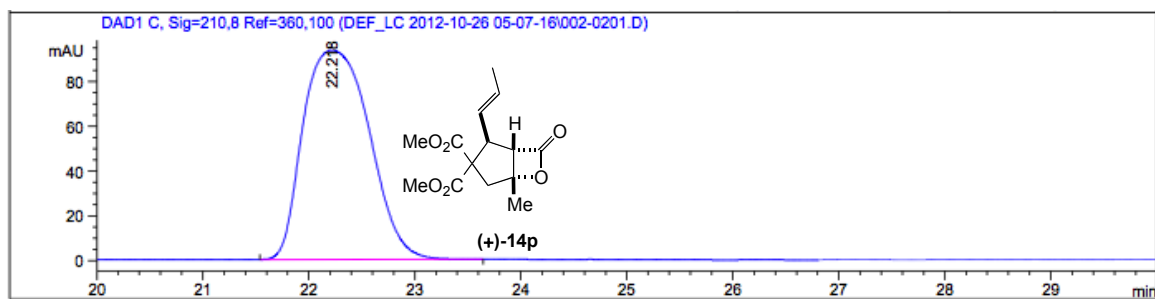

| Peak # | RetTime [min] | Type | Width [min] | Area [mAU*s] | Height [mAU] | Area %   |
|--------|---------------|------|-------------|--------------|--------------|----------|
| 1      | 22.218        | BB   | 0.7221      | 4071.58838   | 93.48624     | 100.0000 |

Totals : 4071.58838 93.48624

**Chiral HPLC Analysis of  $\beta$ -lactone (-)-14p derived from use of (R)-HBTM:** Chiralcel AD-H column: hexanes:*i*PrOH = 70:30, flow rate 0.5 mL/min,  $\lambda$  = 210 nm:  $t_{\text{minor}}$  = 22.2 min,  $t_{\text{major}}$  = 27.2 min; 99% *ee*.

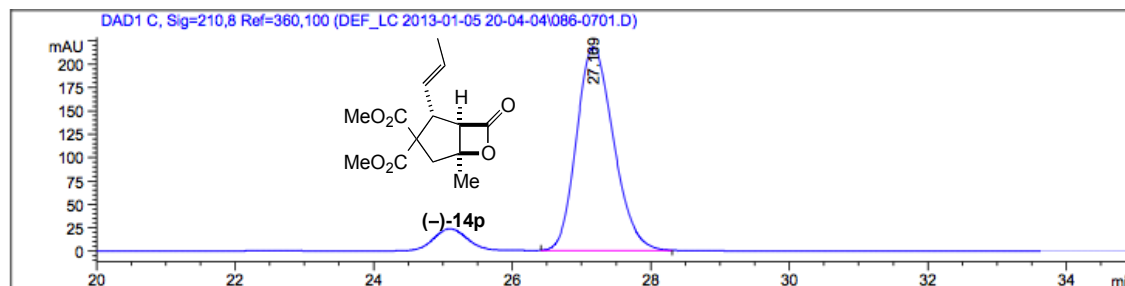

Signal 3: DAD1 C, Sig=210,8 Ref=360,100

| Peak # | RetTime [min] | Type | Width [min] | Area [mAU*s] | Height [mAU] | Area %   |
|--------|---------------|------|-------------|--------------|--------------|----------|
| 1      | 27.169        | BB   | 0.5773      | 8080.22998   | 217.58018    | 100.0000 |

Totals :                               8080.22998   217.58018



### Determination of enantiomeric excess of $\beta$ -lactone (+)-14q:

**Chiral HPLC Analysis of  $\beta$ -lactone (+)-14q:** Chiralcel OD-H column: hexanes:*i*PrOH = 92:08, flow rate 1.0 mL/min,  $\lambda = 210$  nm:  $t_{\text{minor}} = 12.33$  min,  $t_{\text{major}} = 15.22$  min; 99% *ee*.

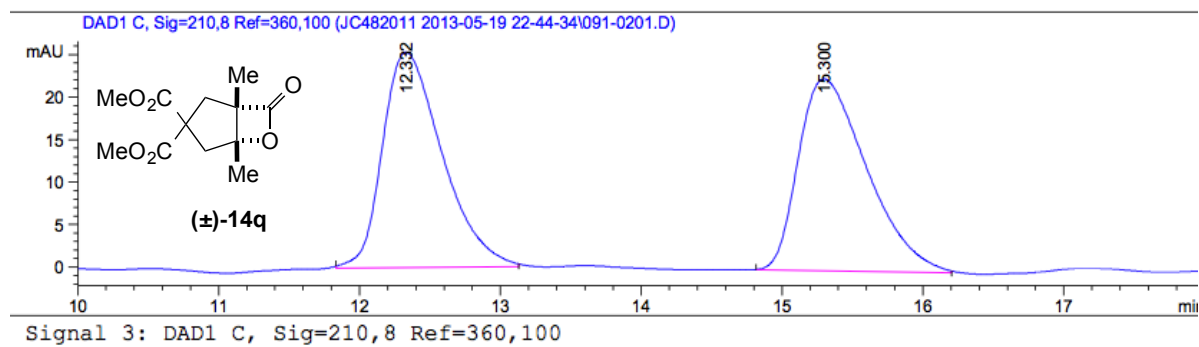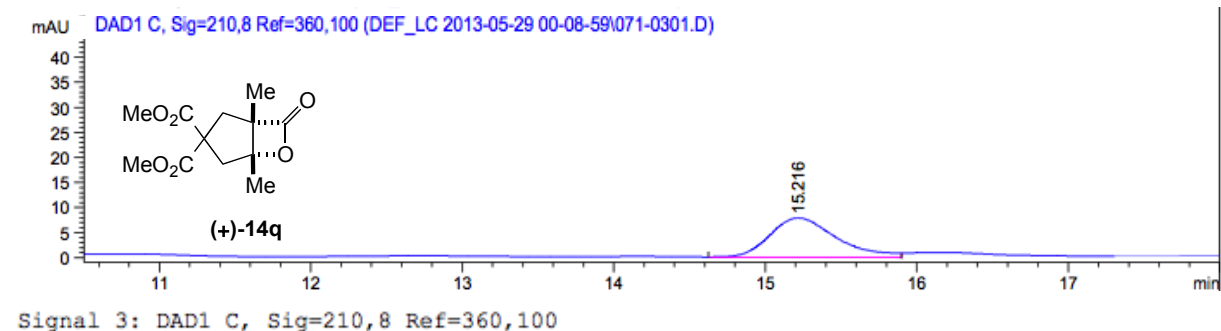

## Determination of enantiomeric excess of $\beta$ -lactone (+)-14s:

**Chiral HPLC Analysis of  $\beta$ -lactone (+)-14s:** Chiralcel AD-H column: hexanes:*i*PrOH = 95:05, flow rate 0.5 mL/min,  $\lambda = 210$  nm:  $t_{\text{major}} = 17.7$  min,  $t_{\text{minor}} = 25.5$  min; 94% *ee*.

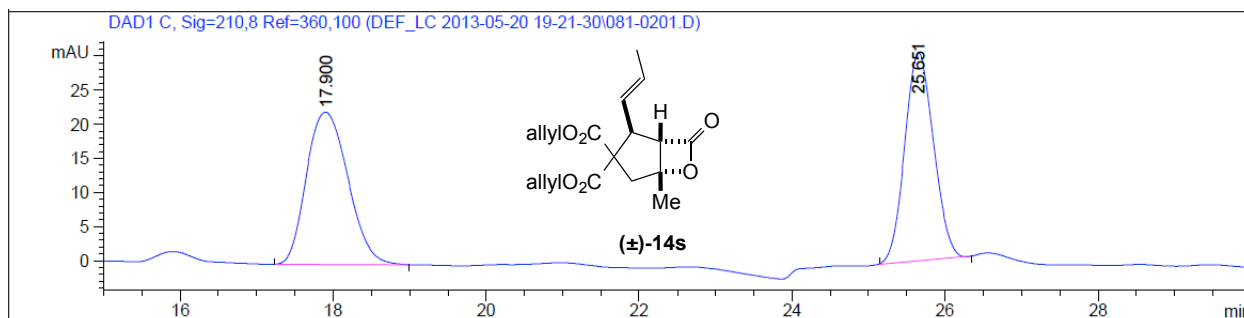

Signal 3: DAD1 C, Sig=210,8 Ref=360,100

| Peak # | RetTime [min] | Type | Width [min] | Area [mAU*s] | Height [mAU] | Area %  |
|--------|---------------|------|-------------|--------------|--------------|---------|
| 1      | 17.900        | BB   | 0.6046      | 842.74713    | 22.31680     | 51.3632 |
| 2      | 25.651        | BB   | 0.4075      | 798.01489    | 30.47148     | 48.6368 |

Totals : 1640.76202 52.78828

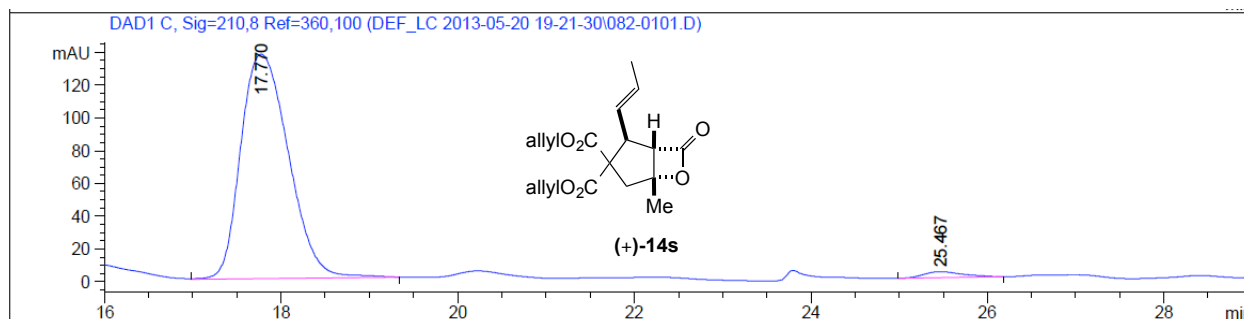

Signal 3: DAD1 C, Sig=210,8 Ref=360,100

| Peak # | RetTime [min] | Type | Width [min] | Area [mAU*s] | Height [mAU] | Area %  |
|--------|---------------|------|-------------|--------------|--------------|---------|
| 1      | 17.770        | VB   | 0.6057      | 5172.05908   | 137.21623    | 97.8567 |
| 2      | 25.467        | BB   | 0.4594      | 113.28335    | 3.65705      | 2.1433  |

Totals : 5285.34243 140.87328

### Determination of enantiomeric excess of $\beta$ -lactone (+)-23:

**Chiral HPLC Analysis of  $\beta$ -lactone(+)-23:** Chiracel AS-H column: hexanes:*i*PrOH = 90:10, flow rate 1.0 mL/min,  $\lambda = 210$  nm:  $t_{\text{major}} = 12.26$  min,  $t_{\text{minor}} = 19.15$  min; 93% *ee*.

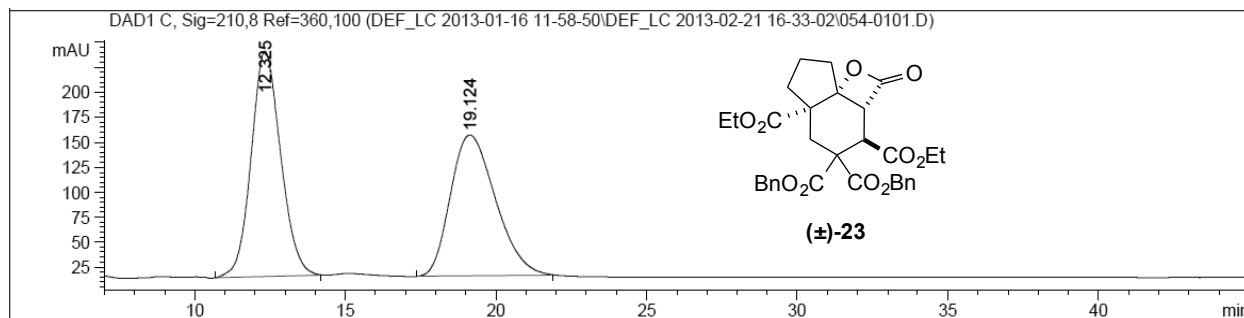

Signal 3: DAD1 C, Sig=210,8 Ref=360,100

| Peak # | RetTime [min] | Type | Width [min] | Area [mAU*s] | Height [mAU] | Area %  |
|--------|---------------|------|-------------|--------------|--------------|---------|
| 1      | 12.325        | BB   | 1.0386      | 1.53574e4    | 225.48831    | 51.1229 |
| 2      | 19.124        | BB   | 1.5974      | 1.46827e4    | 141.17160    | 48.8771 |

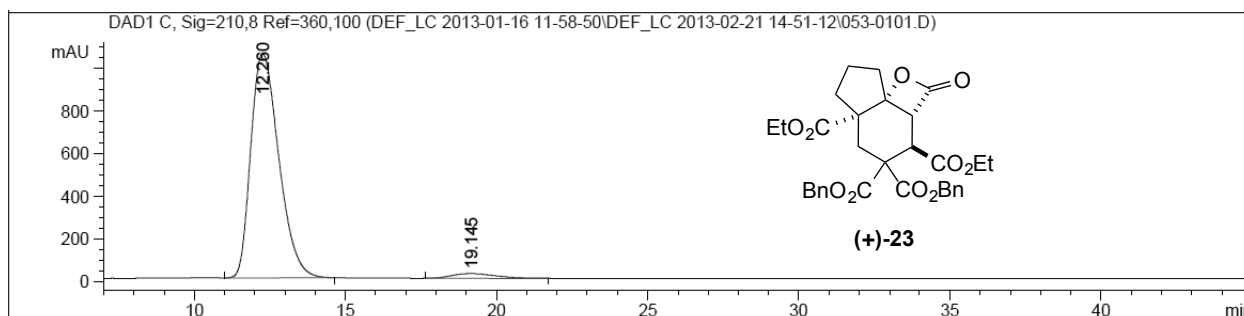

Signal 3: DAD1 C, Sig=210,8 Ref=360,100

| Peak # | RetTime [min] | Type | Width [min] | Area [mAU*s] | Height [mAU] | Area %  |
|--------|---------------|------|-------------|--------------|--------------|---------|
| 1      | 12.260        | VB   | 1.0057      | 6.78546e4    | 1053.12708   | 96.7046 |
| 2      | 19.145        | BB   | 1.4121      | 2312.24585   | 22.55283     | 3.2954  |

**Figure S3. Single crystal X-ray structure (ORTEP) of amide (+)-S16.** The crystals were grown from a concentrated solution of amide (+)-S16 in CDCl<sub>3</sub>, using a slow evaporation method (probability ellipsoids are shown at the 50% level). X-ray crystallographic data have been deposited in the Cambridge Crystallographic Data Centre database (<http://www.ccdc.cam.ac.uk/>) under accession code CCDC 927699.

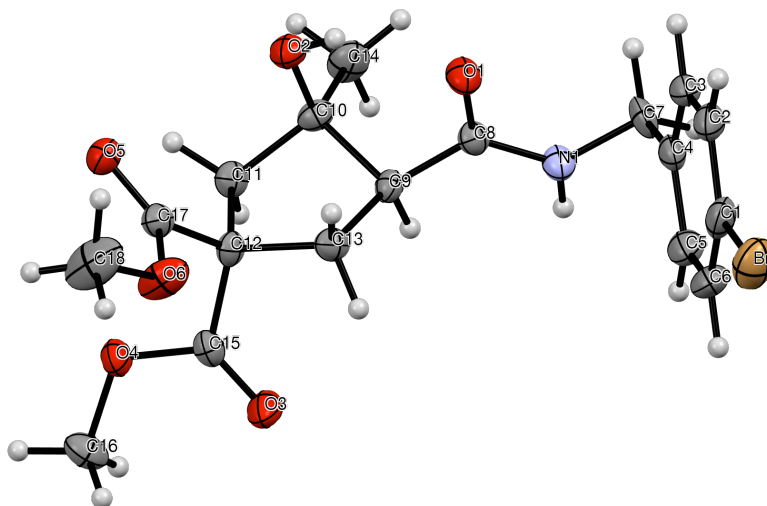

**Table 1. Crystal data and structure refinement for DRB\_MS\_121026\_A1\_306.**

|                                 |                                                     |                  |
|---------------------------------|-----------------------------------------------------|------------------|
| Identification code             | drb                                                 |                  |
| Empirical formula               | C <sub>18</sub> H <sub>22</sub> Br N O <sub>6</sub> |                  |
| Formula weight                  | 428.28                                              |                  |
| Temperature                     | 110(2) K                                            |                  |
| Wavelength                      | 0.71073 Å                                           |                  |
| Crystal system                  | Monoclinic                                          |                  |
| Space group                     | C2                                                  |                  |
| Unit cell dimensions            | a = 25.835(5) Å                                     | a = 90°.         |
|                                 | b = 10.3517(19) Å                                   | b = 102.657(2)°. |
|                                 | c = 7.2252(13) Å                                    | g = 90°.         |
| Volume                          | 1885.3(6) Å <sup>3</sup>                            |                  |
| Z                               | 4                                                   |                  |
| Density (calculated)            | 1.509 Mg/m <sup>3</sup>                             |                  |
| Absorption coefficient          | 2.214 mm <sup>-1</sup>                              |                  |
| F(000)                          | 880                                                 |                  |
| Crystal size                    | 0.14 x 0.09 x 0.02 mm <sup>3</sup>                  |                  |
| Theta range for data collection | 2.13 to 24.99°.                                     |                  |
| Index ranges                    | -30 ≤ h ≤ 30, -12 ≤ k ≤ 12, -8 ≤ l ≤ 8              |                  |
| Reflections collected           | 8634                                                |                  |
| Independent reflections         | 3250 [R(int) = 0.0389]                              |                  |
| Completeness to theta = 24.99°  | 99.5 %                                              |                  |
| Absorption correction           | Semi-empirical from equivalents                     |                  |
| Max. and min. transmission      | 0.9571 and 0.7469                                   |                  |
| Refinement method               | Full-matrix least-squares on F <sup>2</sup>         |                  |

|                                      |                                    |
|--------------------------------------|------------------------------------|
| Data / restraints / parameters       | 3250 / 1 / 239                     |
| Goodness-of-fit on $F^2$             | 1.043                              |
| Final R indices [ $I > 2\sigma(I)$ ] | R1 = 0.0332, wR2 = 0.0734          |
| R indices (all data)                 | R1 = 0.0412, wR2 = 0.0760          |
| Absolute structure parameter         | 0.024(8)                           |
| Largest diff. peak and hole          | 0.338 and -0.217 e.Å <sup>-3</sup> |

**Table 2. Atomic coordinates (  $\times 10^4$ ) and equivalent isotropic displacement parameters ( $\text{\AA}^2 \times 10^3$ ) for DRB\_MS\_121026\_A1\_306. U(eq) is defined as one third of the trace of the orthogonalized  $U^{ij}$  tensor.**

|       | x       | y       | z       | U(eq) |
|-------|---------|---------|---------|-------|
| Br(1) | 685(1)  | -33(1)  | 9099(1) | 48(1) |
| O(1)  | 713(1)  | 5887(2) | 4818(3) | 29(1) |
| O(2)  | 1086(1) | 7405(2) | 2361(3) | 27(1) |
| O(3)  | 2953(1) | 7004(3) | 6603(3) | 44(1) |
| O(4)  | 3083(1) | 7706(2) | 3812(3) | 28(1) |
| O(5)  | 2044(1) | 6847(2) | 442(3)  | 27(1) |
| O(6)  | 2447(1) | 5245(2) | 2257(3) | 40(1) |
| N(1)  | 956(1)  | 6502(3) | 7883(4) | 26(1) |
| C(1)  | 619(1)  | 1805(4) | 8885(5) | 33(1) |
| C(2)  | 183(1)  | 2324(3) | 7673(5) | 30(1) |
| C(3)  | 142(1)  | 3657(3) | 7526(4) | 27(1) |
| C(4)  | 531(1)  | 4459(4) | 8572(5) | 26(1) |
| C(5)  | 956(1)  | 3896(4) | 9789(5) | 34(1) |
| C(6)  | 1008(2) | 2576(4) | 9959(5) | 36(1) |
| C(7)  | 489(1)  | 5917(4) | 8371(6) | 29(1) |
| C(8)  | 1032(1) | 6437(3) | 6107(4) | 23(1) |
| C(9)  | 1515(1) | 7101(3) | 5697(5) | 21(1) |
| C(10) | 1376(1) | 8053(3) | 4015(4) | 24(1) |
| C(11) | 1923(1) | 8349(3) | 3638(5) | 24(1) |
| C(12) | 2217(1) | 7037(3) | 3886(4) | 21(1) |
| C(13) | 1908(1) | 6180(3) | 5063(5) | 24(1) |
| C(14) | 1079(2) | 9251(3) | 4446(5) | 37(1) |
| C(15) | 2787(1) | 7219(3) | 4968(5) | 24(1) |
| C(16) | 3644(1) | 7911(4) | 4675(6) | 34(1) |
| C(17) | 2219(1) | 6402(3) | 1974(5) | 25(1) |
| C(18) | 2506(2) | 4556(4) | 551(5)  | 58(1) |

**Figure S4. Single crystal X-ray structure (ORTEP) of bicyclic- $\beta$ -lactone ( $\pm$ )-14k.** The crystals were grown from a concentrated solution of  $\beta$ -lactone ( $\pm$ )-14k in diethyl ether, using a slow evaporation method (probability ellipsoids are shown at the 50% level). X-ray crystallographic data have been deposited in the Cambridge Crystallographic Data Centre database (<http://www.ccdc.cam.ac.uk/>) under accession code CCDC 940574.

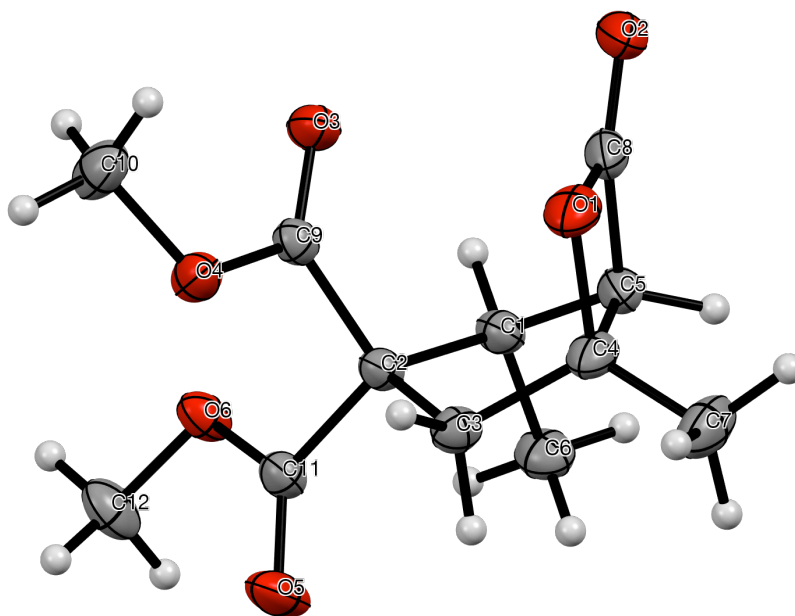

**Table 1. Crystal data and structure refinement for DRB\_GL\_120307\_A3\_40\_2.**

|                                 |                                                |                  |
|---------------------------------|------------------------------------------------|------------------|
| Identification code             | drb                                            |                  |
| Empirical formula               | C <sub>12</sub> H <sub>16</sub> O <sub>6</sub> |                  |
| Formula weight                  | 256.25                                         |                  |
| Temperature                     | 110(2) K                                       |                  |
| Wavelength                      | 0.71073 Å                                      |                  |
| Crystal system                  | Triclinic                                      |                  |
| Space group                     | P-1                                            |                  |
| Unit cell dimensions            | a = 6.891(4) Å                                 | a = 102.611(7)°. |
|                                 | b = 9.592(6) Å                                 | b = 90.215(7)°.  |
|                                 | c = 10.273(7) Å                                | g = 106.979(7)°. |
| Volume                          | 632.1(7) Å <sup>3</sup>                        |                  |
| Z                               | 2                                              |                  |
| Density (calculated)            | 1.346 Mg/m <sup>3</sup>                        |                  |
| Absorption coefficient          | 0.109 mm <sup>-1</sup>                         |                  |
| F(000)                          | 272                                            |                  |
| Crystal size                    | 0.58 x 0.35 x 0.13 mm <sup>3</sup>             |                  |
| Theta range for data collection | 2.69 to 27.50°.                                |                  |
| Index ranges                    | -8<=h<=8, -12<=k<=12, -13<=l<=13               |                  |
| Reflections collected           | 7210                                           |                  |
| Independent reflections         | 2858 [R(int) = 0.0265]                         |                  |
| Completeness to theta = 27.50°  | 98.6 %                                         |                  |

|                                      |                                    |
|--------------------------------------|------------------------------------|
| Absorption correction                | Semi-empirical from equivalents    |
| Max. and min. transmission           | 0.9860 and 0.9397                  |
| Refinement method                    | Full-matrix least-squares on $F^2$ |
| Data / restraints / parameters       | 2858 / 0 / 167                     |
| Goodness-of-fit on $F^2$             | 1.060                              |
| Final R indices [ $I > 2\sigma(I)$ ] | R1 = 0.0371, wR2 = 0.0938          |
| R indices (all data)                 | R1 = 0.0436, wR2 = 0.0978          |
| Largest diff. peak and hole          | 0.289 and -0.209 e.Å <sup>-3</sup> |

**Table 2. Atomic coordinates (  $\times 10^4$ ) and equivalent isotropic displacement parameters ( $\text{\AA}^2 \times 10^3$ ) for DRB\_GL\_120307\_A3\_40\_2.  $U(\text{eq})$  is defined as one third of the trace of the orthogonalized  $U^{ij}$  tensor.**

|       | x        | y       | z       | $U(\text{eq})$ |
|-------|----------|---------|---------|----------------|
| C(1)  | 9081(2)  | 986(1)  | 6833(1) | 23(1)          |
| C(2)  | 9825(2)  | 2678(1) | 6776(1) | 20(1)          |
| C(3)  | 8776(2)  | 3456(1) | 7913(1) | 24(1)          |
| C(4)  | 8610(2)  | 2586(2) | 8994(1) | 28(1)          |
| C(5)  | 8844(2)  | 1042(1) | 8333(1) | 27(1)          |
| C(6)  | 7033(2)  | 147(1)  | 6050(1) | 31(1)          |
| C(7)  | 6997(2)  | 2708(2) | 9949(1) | 41(1)          |
| C(8)  | 10784(2) | 1557(2) | 9241(1) | 31(1)          |
| C(9)  | 12149(2) | 3297(1) | 6973(1) | 22(1)          |
| C(10) | 14893(2) | 5476(2) | 7018(2) | 36(1)          |
| C(11) | 9186(2)  | 2891(1) | 5420(1) | 24(1)          |
| C(12) | 9766(2)  | 2488(2) | 3125(1) | 35(1)          |
| O(1)  | 10653(1) | 2965(1) | 9760(1) | 33(1)          |
| O(2)  | 12054(1) | 1044(1) | 9540(1) | 42(1)          |
| O(3)  | 13292(1) | 2600(1) | 7126(1) | 29(1)          |
| O(4)  | 12726(1) | 4745(1) | 6936(1) | 28(1)          |
| O(5)  | 7849(2)  | 3398(1) | 5223(1) | 39(1)          |
| O(6)  | 10308(1) | 2399(1) | 4465(1) | 27(1)          |

**Figure S5. Single crystal X-ray structure (ORTEP) of bicyclic- $\beta$ -lactone ( $\pm$ )-14m.** The crystals were grown from a concentrated solution of  $\beta$ -lactone ( $\pm$ )-14m in diethyl ether, using a slow evaporation method (probability ellipsoids are shown at the 50% level). X-ray crystallographic data have been deposited in the Cambridge Crystallographic Data Centre database (<http://www.ccdc.cam.ac.uk/>) under accession code CCDC 940572.

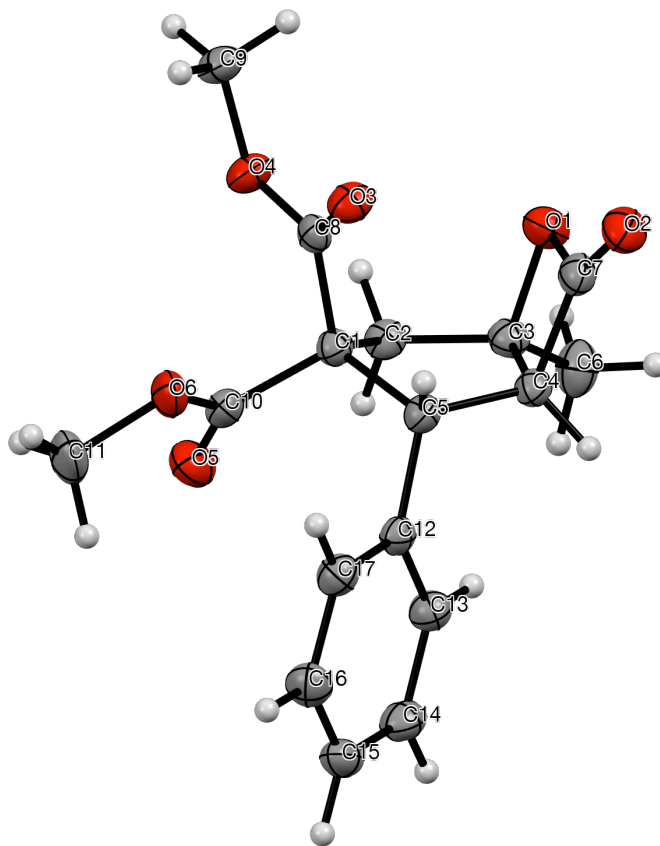

**Table 1. Crystal data and structure refinement for DRB\_GL\_120307\_A3\_40\_3.**

|                        |                                                |                  |
|------------------------|------------------------------------------------|------------------|
| Identification code    | drb                                            |                  |
| Empirical formula      | C <sub>17</sub> H <sub>18</sub> O <sub>6</sub> |                  |
| Formula weight         | 318.31                                         |                  |
| Temperature            | 110(2) K                                       |                  |
| Wavelength             | 0.71073 Å                                      |                  |
| Crystal system         | Monoclinic                                     |                  |
| Space group            | P2(1)/c                                        |                  |
| Unit cell dimensions   | a = 9.695(2) Å                                 | a = 90°.         |
|                        | b = 13.257(3) Å                                | b = 106.298(3)°. |
|                        | c = 12.556(3) Å                                | g = 90°.         |
| Volume                 | 1549.0(6) Å <sup>3</sup>                       |                  |
| Z                      | 4                                              |                  |
| Density (calculated)   | 1.365 Mg/m <sup>3</sup>                        |                  |
| Absorption coefficient | 0.104 mm <sup>-1</sup>                         |                  |
| F(000)                 | 672                                            |                  |



|                                   |                                             |
|-----------------------------------|---------------------------------------------|
| Crystal size                      | 0.45 x 0.15 x 0.10 mm <sup>3</sup>          |
| Theta range for data collection   | 2.67 to 24.19°                              |
| Index ranges                      | -11<=h<=11, -9<=k<=15, -11<=l<=14           |
| Reflections collected             | 6067                                        |
| Independent reflections           | 2469 [R(int) = 0.0174]                      |
| Completeness to theta = 24.19°    | 99.4 %                                      |
| Absorption correction             | Semi-empirical from equivalents             |
| Max. and min. transmission        | 0.9897 and 0.9548                           |
| Refinement method                 | Full-matrix least-squares on F <sup>2</sup> |
| Data / restraints / parameters    | 2469 / 0 / 211                              |
| Goodness-of-fit on F <sup>2</sup> | 1.032                                       |
| Final R indices [I>2sigma(I)]     | R1 = 0.0323, wR2 = 0.0810                   |
| R indices (all data)              | R1 = 0.0382, wR2 = 0.0870                   |
| Largest diff. peak and hole       | 0.225 and -0.201 e.Å <sup>-3</sup>          |

**Table 2. Atomic coordinates ( x 10<sup>4</sup>) and equivalent isotropic displacement parameters (Å<sup>2</sup>x 10<sup>3</sup>) for DRB\_GL\_120307\_A3\_40\_3. U(eq) is defined as one third of the trace of the orthogonalized U<sup>ij</sup> tensor.**

|       | x        | y       | z        | U(eq) |
|-------|----------|---------|----------|-------|
| C(1)  | 8317(2)  | 6000(1) | 1963(1)  | 22(1) |
| C(2)  | 7746(2)  | 5370(1) | 899(1)   | 25(1) |
| C(3)  | 7040(2)  | 6103(1) | -9(1)    | 25(1) |
| C(4)  | 7651(2)  | 7158(1) | 368(1)   | 23(1) |
| C(5)  | 8688(2)  | 7067(1) | 1549(1)  | 22(1) |
| C(6)  | 6834(2)  | 5747(1) | -1180(1) | 36(1) |
| C(7)  | 6131(2)  | 7410(1) | 352(1)   | 26(1) |
| C(8)  | 7202(2)  | 6112(1) | 2609(1)  | 21(1) |
| C(9)  | 5758(2)  | 5217(1) | 3522(1)  | 30(1) |
| C(10) | 9652(2)  | 5513(1) | 2733(1)  | 26(1) |
| C(11) | 11293(2) | 5597(2) | 4519(2)  | 45(1) |
| C(12) | 10252(2) | 7175(1) | 1583(1)  | 22(1) |
| C(13) | 10799(2) | 6845(1) | 730(1)   | 27(1) |
| C(14) | 12243(2) | 6939(1) | 821(1)   | 31(1) |
| C(15) | 13172(2) | 7352(1) | 1762(1)  | 31(1) |
| C(16) | 12644(2) | 7685(1) | 2614(1)  | 32(1) |
| C(17) | 11195(2) | 7608(1) | 2519(1)  | 28(1) |
| O(1)  | 5614(1)  | 6452(1) | 122(1)   | 31(1) |
| O(2)  | 5465(1)  | 8138(1) | 474(1)   | 35(1) |
| O(3)  | 6774(1)  | 6901(1) | 2872(1)  | 28(1) |
| O(4)  | 6777(1)  | 5208(1) | 2863(1)  | 28(1) |
| O(5)  | 10359(1) | 4868(1) | 2469(1)  | 37(1) |
| O(6)  | 9958(1)  | 5929(1) | 3748(1)  | 32(1) |

**Figure S6. Single crystal X-ray structure (ORTEP) of bicyclic- $\beta$ -lactone (+)-14p.** The crystals were grown from a concentrated solution of amide  $\beta$ -lactone (+)-14p in  $\text{CDCl}_3$ , using a slow evaporation method (probability ellipsoids are shown at the 50% level). X-ray crystallographic data have been deposited in the Cambridge Crystallographic Data Centre database (<http://www.ccdc.cam.ac.uk/>) under accession code CCDC 927698.

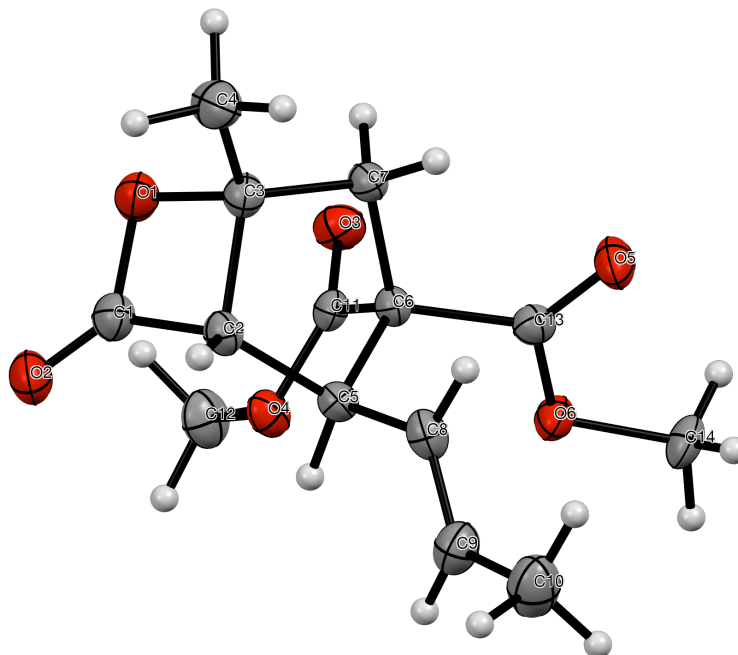

**Table 1. Crystal data and structure refinement for DRB\_MS\_121001\_G\_290A.**

|                                 |                                                |                       |
|---------------------------------|------------------------------------------------|-----------------------|
| Identification code             | drb                                            |                       |
| Empirical formula               | C <sub>14</sub> H <sub>18</sub> O <sub>6</sub> |                       |
| Formula weight                  | 282.28                                         |                       |
| Temperature                     | 110(2) K                                       |                       |
| Wavelength                      | 1.54178 Å                                      |                       |
| Crystal system                  | Orthorhombic                                   |                       |
| Space group                     | P2(1)2(1)2(1)                                  |                       |
| Unit cell dimensions            | a = 8.9133(3) Å                                | $\alpha = 90^\circ$ . |
|                                 | b = 12.1780(5) Å                               | $\beta = 90^\circ$ .  |
|                                 | c = 12.9803(5) Å                               | $\gamma = 90^\circ$ . |
| Volume                          | 1408.96(9) Å <sup>3</sup>                      |                       |
| Z                               | 4                                              |                       |
| Density (calculated)            | 1.331 Mg/m <sup>3</sup>                        |                       |
| Absorption coefficient          | 0.878 mm <sup>-1</sup>                         |                       |
| F(000)                          | 600                                            |                       |
| Crystal size                    | 0.22 x 0.09 x 0.02 mm <sup>3</sup>             |                       |
| Theta range for data collection | 4.98 to 60.00°                                 |                       |
| Index ranges                    | -10 ≤ h ≤ 10, -13 ≤ k ≤ 12, -14 ≤ l ≤ 14       |                       |
| Reflections collected           | 28220                                          |                       |
| Independent reflections         | 2069 [R(int) = 0.0521]                         |                       |

|                                      |                                             |
|--------------------------------------|---------------------------------------------|
| Completeness to theta = 60.00°       | 99.3 %                                      |
| Absorption correction                | Semi-empirical from equivalents             |
| Max. and min. transmission           | 0.9826 and 0.8302                           |
| Refinement method                    | Full-matrix least-squares on F <sup>2</sup> |
| Data / restraints / parameters       | 2069 / 0 / 185                              |
| Goodness-of-fit on F <sup>2</sup>    | 1.082                                       |
| Final R indices [I>2sigma(I)]        | R1 = 0.0309, wR2 = 0.0823                   |
| R indices (all data)                 | R1 = 0.0335, wR2 = 0.0833                   |
| Absolute structure parameter [Hooft] | -0.2(2) [-0.17(8)]                          |
| Largest diff. peak and hole          | 0.354 and -0.198 e.Å <sup>-3</sup>          |

**Table 2. Atomic coordinates ( x 10<sup>4</sup>) and equivalent isotropic displacement parameters (Å<sup>2</sup>x 10<sup>3</sup>) for DRB\_MS\_121001\_G\_290A. U(eq) is defined as one third of the trace of the orthogonalized U<sup>ij</sup> tensor.**

|       | x        | y        | z       | U(eq) |
|-------|----------|----------|---------|-------|
| C(1)  | 9124(2)  | -236(2)  | 3096(2) | 28(1) |
| C(2)  | 9367(2)  | 773(2)   | 2425(2) | 22(1) |
| C(3)  | 10333(2) | 1184(2)  | 3330(2) | 24(1) |
| C(4)  | 12006(3) | 1254(2)  | 3248(2) | 34(1) |
| C(5)  | 7993(2)  | 1542(2)  | 2327(1) | 21(1) |
| C(6)  | 7898(2)  | 2068(1)  | 3429(1) | 20(1) |
| C(7)  | 9541(2)  | 2173(2)  | 3776(2) | 22(1) |
| C(8)  | 8260(2)  | 2364(2)  | 1486(2) | 25(1) |
| C(9)  | 7444(3)  | 2434(2)  | 634(2)  | 31(1) |
| C(10) | 7747(3)  | 3153(2)  | -266(2) | 44(1) |
| C(11) | 7020(2)  | 1369(2)  | 4210(2) | 21(1) |
| C(12) | 5329(3)  | -75(2)   | 4489(2) | 32(1) |
| C(13) | 7142(2)  | 3197(2)  | 3406(1) | 22(1) |
| C(14) | 4819(2)  | 4115(2)  | 3334(2) | 28(1) |
| O(1)  | 9897(2)  | 159(1)   | 3923(1) | 30(1) |
| O(2)  | 8513(2)  | -1106(1) | 3034(1) | 34(1) |
| O(3)  | 7127(2)  | 1509(1)  | 5125(1) | 28(1) |
| O(4)  | 6140(2)  | 622(1)   | 3771(1) | 24(1) |
| O(5)  | 7794(2)  | 4054(1)  | 3458(1) | 33(1) |
| O(6)  | 5661(1)  | 3095(1)  | 3329(1) | 25(1) |

**Figure S7. Single crystal X-ray structure (ORTEP) of bicyclic- $\beta$ -lactone ( $\pm$ )-14q.** The crystals were grown from a concentrated solution of  $\beta$ -lactone ( $\pm$ )-14q in diethyl ether, using a slow evaporation method (probability ellipsoids are shown at the 50% level). X-ray crystallographic data have been deposited in the Cambridge Crystallographic Data Centre database (<http://www.ccdc.cam.ac.uk/>) under accession code CCDC 940574.

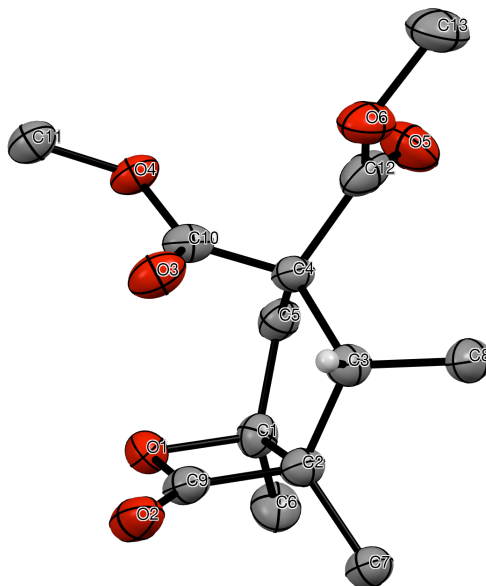

**Table 1. Crystal data and structure refinement for DRB\_GL\_120405\_G\_53\_3.**

|                                 |                                    |                  |
|---------------------------------|------------------------------------|------------------|
| Identification code             | drb                                |                  |
| Empirical formula               | C13 H18 O6                         |                  |
| Formula weight                  | 270.27                             |                  |
| Temperature                     | 110(2) K                           |                  |
| Wavelength                      | 1.54178 Å                          |                  |
| Crystal system                  | Monoclinic                         |                  |
| Space group                     | P2(1)/n                            |                  |
| Unit cell dimensions            | a = 6.8942(16) Å                   | a = 90°.         |
|                                 | b = 8.0356(18) Å                   | b = 90.741(11)°. |
|                                 | c = 23.889(5) Å                    | g = 90°.         |
| Volume                          | 1323.3(5) Å <sup>3</sup>           |                  |
| Z                               | 4                                  |                  |
| Density (calculated)            | 1.357 Mg/m <sup>3</sup>            |                  |
| Absorption coefficient          | 0.908 mm <sup>-1</sup>             |                  |
| F(000)                          | 576                                |                  |
| Crystal size                    | 0.07 x 0.05 x 0.05 mm <sup>3</sup> |                  |
| Theta range for data collection | 3.70 to 59.98°.                    |                  |
| Index ranges                    | -7<=h<=7, -9<=k<=9, -26<=l<=26     |                  |
| Reflections collected           | 15678                              |                  |
| Independent reflections         | 1921 [R(int) = 0.0490]             |                  |
| Completeness to theta = 59.98°  | 98.5 %                             |                  |
| Absorption correction           | Semi-empirical from equivalents    |                  |

|                                   |                                             |
|-----------------------------------|---------------------------------------------|
| Max. and min. transmission        | 0.9560 and 0.9392                           |
| Refinement method                 | Full-matrix least-squares on F <sup>2</sup> |
| Data / restraints / parameters    | 1921 / 0 / 178                              |
| Goodness-of-fit on F <sup>2</sup> | 1.103                                       |
| Final R indices [I>2sigma(I)]     | R1 = 0.0776, wR2 = 0.2129                   |
| R indices (all data)              | R1 = 0.0901, wR2 = 0.2188                   |
| Extinction coefficient            | 0.0086(16)                                  |
| Largest diff. peak and hole       | 0.618 and -0.262 e.Å <sup>-3</sup>          |

**Table 2. Atomic coordinates ( x 10<sup>4</sup>) and equivalent isotropic displacement parameters (Å<sup>2</sup>x 10<sup>3</sup>) for DRB\_GL\_120405\_G\_53\_3. U(eq) is defined as one third of the trace of the orthogonalized U<sup>ij</sup> tensor.**

|       | x        | y       | z       | U(eq) |
|-------|----------|---------|---------|-------|
| C(1)  | -2923(6) | 4934(6) | 3149(2) | 30(1) |
| C(2)  | -2111(6) | 6288(5) | 3553(2) | 31(1) |
| C(3)  | -1737(7) | 5419(5) | 4122(2) | 33(1) |
| C(4)  | -1626(6) | 3528(5) | 3969(2) | 30(1) |
| C(5)  | -3060(6) | 3346(5) | 3475(2) | 30(1) |
| C(6)  | -4600(7) | 5348(6) | 2758(2) | 40(1) |
| C(7)  | -3086(7) | 7991(6) | 3572(2) | 38(1) |
| C(8)  | -3320(8) | 5783(6) | 4541(2) | 43(1) |
| C(9)  | -370(6)  | 6253(5) | 3172(2) | 33(1) |
| C(10) | 454(6)   | 3042(5) | 3824(2) | 31(1) |
| C(11) | 2385(6)  | 891(6)  | 3455(2) | 34(1) |
| C(12) | -2361(8) | 2376(6) | 4450(2) | 41(1) |
| O(5)  | -3851(6) | 1678(5) | 4454(2) | 54(1) |
| O(6)  | -1002(5) | 2318(4) | 4856(1) | 48(1) |
| C(13) | -1655(9) | 1330(7) | 5337(2) | 56(2) |
| O(1)  | -1036(4) | 5003(4) | 2835(1) | 34(1) |
| O(2)  | 1109(5)  | 7004(4) | 3123(2) | 47(1) |
| O(3)  | 1844(5)  | 3904(4) | 3875(1) | 41(1) |
| O(4)  | 499(4)   | 1479(3) | 3624(1) | 32(1) |

**Figure S8. Single crystal X-ray structure (ORTEP) of tricyclic- $\beta$ -lactone ( $\pm$ )-14t.** The crystals were grown from a concentrated solution of  $\beta$ -lactone ( $\pm$ )-14t in  $\text{CDCl}_3$ , using a slow evaporation method (probability ellipsoids are shown at the 50% level). X-ray crystallographic data have been deposited in the Cambridge Crystallographic Data Centre database (<http://www.ccdc.cam.ac.uk/>) under accession code CCDC 927698.

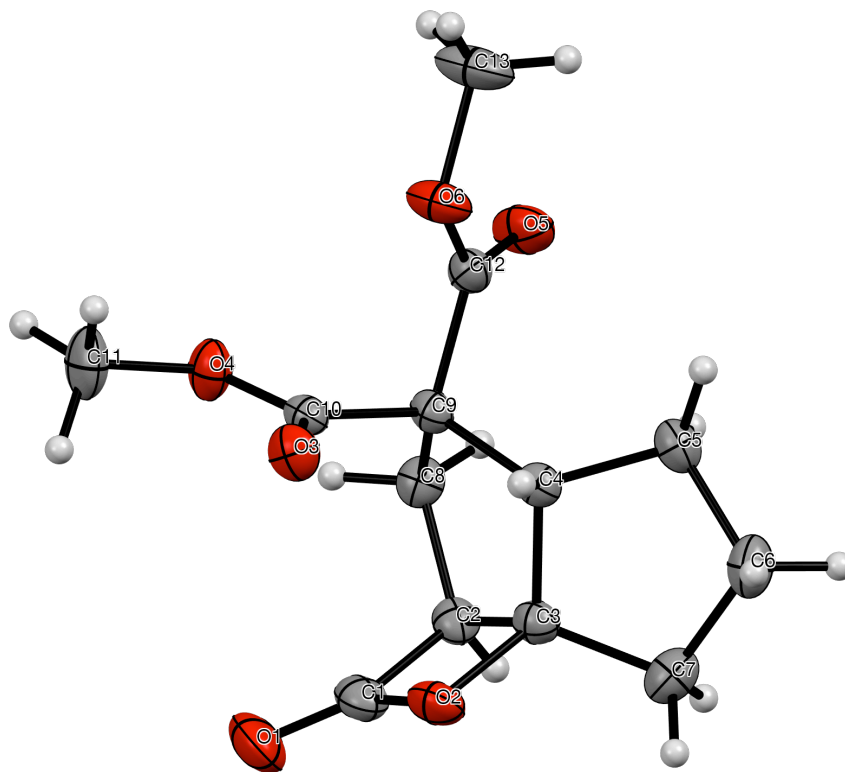

**Table 1. Crystal data and structure refinement for DRB\_MS\_120913\_A3\_SS4BL.**

|                        |                                                |                 |
|------------------------|------------------------------------------------|-----------------|
| Identification code    | drb                                            |                 |
| Empirical formula      | C <sub>13</sub> H <sub>16</sub> O <sub>6</sub> |                 |
| Formula weight         | 268.26                                         |                 |
| Temperature            | 150(2) K                                       |                 |
| Wavelength             | 0.71073 Å                                      |                 |
| Crystal system         | Monoclinic                                     |                 |
| Space group            | P2(1)/n                                        |                 |
| Unit cell dimensions   | a = 7.7457(16) Å                               | a = 90°.        |
|                        | b = 12.057(3) Å                                | b = 98.045(2)°. |
|                        | c = 14.063(3) Å                                | g = 90°.        |
| Volume                 | 1300.4(5) Å <sup>3</sup>                       |                 |
| Z                      | 4                                              |                 |
| Density (calculated)   | 1.370 Mg/m <sup>3</sup>                        |                 |
| Absorption coefficient | 0.109 mm <sup>-1</sup>                         |                 |
| F(000)                 | 568                                            |                 |

|                                   |                                             |
|-----------------------------------|---------------------------------------------|
| Crystal size                      | 0.18 x 0.17 x 0.11 mm <sup>3</sup>          |
| Theta range for data collection   | 2.23 to 27.49°                              |
| Index ranges                      | -9<=h<=9, -15<=k<=15, -18<=l<=18            |
| Reflections collected             | 13565                                       |
| Independent reflections           | 2950 [R(int) = 0.0252]                      |
| Completeness to theta = 27.49°    | 99.3 %                                      |
| Absorption correction             | Semi-empirical from equivalents             |
| Max. and min. transmission        | 0.9881 and 0.9806                           |
| Refinement method                 | Full-matrix least-squares on F <sup>2</sup> |
| Data / restraints / parameters    | 2950 / 0 / 174                              |
| Goodness-of-fit on F <sup>2</sup> | 1.050                                       |
| Final R indices [I>2sigma(I)]     | R1 = 0.0360, wR2 = 0.0952                   |
| R indices (all data)              | R1 = 0.0420, wR2 = 0.1003                   |
| Largest diff. peak and hole       | 0.329 and -0.174 e.Å <sup>-3</sup>          |

**Table 2. Atomic coordinates ( x 10<sup>4</sup>) and equivalent isotropic displacement parameters (Å<sup>2</sup>x 10<sup>3</sup>) for DRB\_MS\_120913\_A3\_SS4BL. U(eq) is defined as one third of the trace of the orthogonalized U<sup>ij</sup> tensor.**

|       | x       | y       | z       | U(eq) |
|-------|---------|---------|---------|-------|
| C(1)  | 2877(2) | 4445(1) | 1736(1) | 32(1) |
| C(2)  | 3301(2) | 4346(1) | 2819(1) | 25(1) |
| C(3)  | 1821(2) | 5195(1) | 2823(1) | 24(1) |
| C(4)  | 2657(1) | 6276(1) | 3221(1) | 21(1) |
| C(5)  | 2043(2) | 6336(1) | 4208(1) | 27(1) |
| C(6)  | 131(2)  | 5990(1) | 3970(1) | 32(1) |
| C(7)  | 210(2)  | 4989(1) | 3305(1) | 33(1) |
| C(8)  | 4981(2) | 4892(1) | 3286(1) | 24(1) |
| C(9)  | 4642(1) | 6153(1) | 3192(1) | 21(1) |
| C(10) | 5127(2) | 6620(1) | 2250(1) | 22(1) |
| C(11) | 7411(2) | 6797(1) | 1318(1) | 41(1) |
| C(12) | 5673(2) | 6792(1) | 4024(1) | 24(1) |
| C(13) | 6744(2) | 8558(1) | 4535(1) | 47(1) |
| O(1)  | 3415(2) | 4100(1) | 1042(1) | 48(1) |
| O(2)  | 1518(1) | 5163(1) | 1754(1) | 32(1) |
| O(3)  | 4187(1) | 7150(1) | 1671(1) | 30(1) |
| O(4)  | 6772(1) | 6359(1) | 2161(1) | 31(1) |
| O(5)  | 6208(1) | 6396(1) | 4790(1) | 37(1) |
| O(6)  | 5840(1) | 7850(1) | 3791(1) | 34(1) |

**Figure S9. Single crystal X-ray structure (ORTEP) of tricyclic- $\beta$ -lactone ( $\pm$ )-14v.** The crystals were grown from a concentrated solution of  $\beta$ -lactone ( $\pm$ )-14v in diethyl ether, using a slow evaporation method (probability ellipsoids are shown at the 50% level). X-ray crystallographic data have been deposited in the Cambridge Crystallographic Data Centre database (<http://www.ccdc.cam.ac.uk/>) under accession code CCDC 875803.

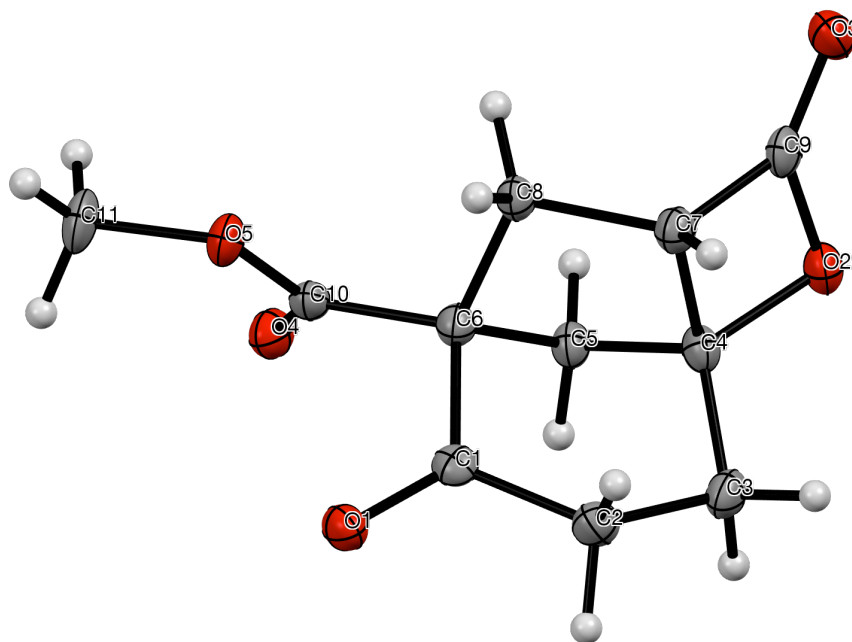

**Table 1. Crystal data and structure refinement for DRB\_GL\_120305\_G\_5038.**

|                                 |                                      |                  |
|---------------------------------|--------------------------------------|------------------|
| Identification code             | drb                                  |                  |
| Empirical formula               | C11 H12 O5                           |                  |
| Formula weight                  | 224.21                               |                  |
| Temperature                     | 110(2) K                             |                  |
| Wavelength                      | 1.54178 Å                            |                  |
| Crystal system                  | Triclinic                            |                  |
| Space group                     | P-1                                  |                  |
| Unit cell dimensions            | a = 6.1277(8) Å                      | a = 91.291(9)°.  |
|                                 | b = 7.5181(9) Å                      | b = 98.594(9)°.  |
|                                 | c = 10.9862(14) Å                    | g = 91.918(10)°. |
| Volume                          | 499.96(11) Å <sup>3</sup>            |                  |
| Z                               | 2                                    |                  |
| Density (calculated)            | 1.489 Mg/m <sup>3</sup>              |                  |
| Absorption coefficient          | 1.007 mm <sup>-1</sup>               |                  |
| F(000)                          | 236                                  |                  |
| Crystal size                    | 0.11 x 0.08 x 0.05 mm <sup>3</sup>   |                  |
| Theta range for data collection | 4.07 to 60.00°.                      |                  |
| Index ranges                    | -6 ≤ h ≤ 6, -8 ≤ k ≤ 8, -12 ≤ l ≤ 12 |                  |
| Reflections collected           | 11342                                |                  |
| Independent reflections         | 1450 [R(int) = 0.0623]               |                  |



|                                   |                                             |
|-----------------------------------|---------------------------------------------|
| Completeness to theta = 60.00°    | 97.8 %                                      |
| Absorption correction             | Semi-empirical from equivalents             |
| Max. and min. transmission        | 0.9514 and 0.8973                           |
| Refinement method                 | Full-matrix least-squares on F <sup>2</sup> |
| Data / restraints / parameters    | 1450 / 0 / 147                              |
| Goodness-of-fit on F <sup>2</sup> | 1.034                                       |
| Final R indices [I>2sigma(I)]     | R1 = 0.0340, wR2 = 0.0922                   |
| R indices (all data)              | R1 = 0.0404, wR2 = 0.0943                   |
| Extinction coefficient            | 0.022(2)                                    |
| Largest diff. peak and hole       | 0.191 and -0.205 e.Å <sup>-3</sup>          |

**Table 2. Atomic coordinates ( x 10<sup>4</sup>) and equivalent isotropic displacement parameters (Å<sup>2</sup>x 10<sup>3</sup>) for DRB\_GL\_120305\_G\_5038. U(eq) is defined as one third of the trace of the orthogonalized U<sup>ij</sup> tensor.**

|       | x        | y       | z       | U(eq) |
|-------|----------|---------|---------|-------|
| C(1)  | -176(3)  | 3959(2) | 6390(2) | 17(1) |
| C(2)  | 471(3)   | 2164(2) | 5921(2) | 21(1) |
| C(3)  | 2986(3)  | 1854(2) | 6035(2) | 21(1) |
| C(4)  | 3985(3)  | 2806(2) | 7212(2) | 18(1) |
| C(5)  | 3703(3)  | 4810(2) | 7149(2) | 18(1) |
| C(6)  | 1355(3)  | 4887(2) | 7487(2) | 17(1) |
| C(7)  | 3054(3)  | 2279(2) | 8374(2) | 18(1) |
| C(8)  | 1546(3)  | 3763(2) | 8677(2) | 17(1) |
| C(9)  | 5465(3)  | 2175(2) | 8914(2) | 19(1) |
| C(10) | 580(3)   | 6740(2) | 7652(2) | 17(1) |
| C(11) | -2029(3) | 8464(2) | 8446(2) | 27(1) |
| O(1)  | -1821(2) | 4669(2) | 5906(1) | 22(1) |
| O(2)  | 6235(2)  | 2332(2) | 7806(1) | 22(1) |
| O(3)  | 6573(2)  | 2012(2) | 9896(1) | 25(1) |
| O(4)  | 1328(2)  | 8054(2) | 7227(1) | 22(1) |
| O(5)  | -1084(2) | 6751(2) | 8313(1) | 20(1) |

**Figure S10. Single crystal X-ray structure (ORTEP) of bicyclic- $\beta$ -lactone ( $\pm$ )-14x.** The crystals were grown from a concentrated solution of  $\beta$ -lactone ( $\pm$ )-14x in  $\text{CDCl}_3$ , using a slow evaporation method (probability ellipsoids are shown at the 50% level). X-ray crystallographic data have been deposited in the Cambridge Crystallographic Data Centre database (<http://www.ccdc.cam.ac.uk/>) under accession code CCDC 940570.

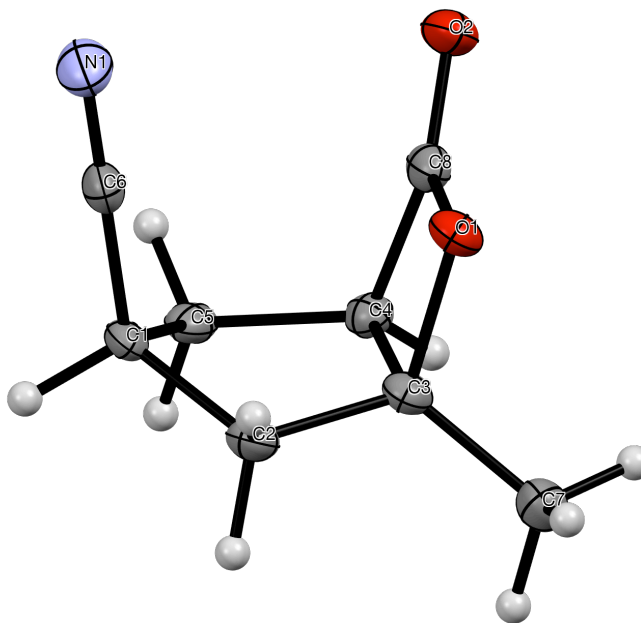

**Table 1. Crystal data and structure refinement for DRB\_MS\_130218\_G\_RB1.**

|                                 |                                                |                 |
|---------------------------------|------------------------------------------------|-----------------|
| Identification code             | drb                                            |                 |
| Empirical formula               | C <sub>8</sub> H <sub>9</sub> N O <sub>2</sub> |                 |
| Formula weight                  | 151.16                                         |                 |
| Temperature                     | 110(2) K                                       |                 |
| Wavelength                      | 1.54178 Å                                      |                 |
| Crystal system                  | Monoclinic                                     |                 |
| Space group                     | P2(1)/c                                        |                 |
| Unit cell dimensions            | a = 5.6893(5) Å                                | a = 90°.        |
|                                 | b = 10.7024(11) Å                              | b = 95.454(6)°. |
|                                 | c = 12.4002(12) Å                              | g = 90°.        |
| Volume                          | 751.62(12) Å <sup>3</sup>                      |                 |
| Z                               | 4                                              |                 |
| Density (calculated)            | 1.336 Mg/m <sup>3</sup>                        |                 |
| Absorption coefficient          | 0.802 mm <sup>-1</sup>                         |                 |
| F(000)                          | 320                                            |                 |
| Crystal size                    | 0.06 x 0.05 x 0.03 mm <sup>3</sup>             |                 |
| Theta range for data collection | 5.47 to 60.00°.                                |                 |
| Index ranges                    | -6 ≤ h ≤ 6, 0 ≤ k ≤ 12, 0 ≤ l ≤ 13             |                 |
| Reflections collected           | 1110                                           |                 |

|                                   |                                             |
|-----------------------------------|---------------------------------------------|
| Independent reflections           | 1110 [R(int) = 0.0000]                      |
| Completeness to theta = 60.00°    | 99.6 %                                      |
| Absorption correction             | Semi-empirical from equivalents             |
| Max. and min. transmission        | 0.9764 and 0.9535                           |
| Refinement method                 | Full-matrix least-squares on F <sup>2</sup> |
| Data / restraints / parameters    | 1110 / 0 / 101                              |
| Goodness-of-fit on F <sup>2</sup> | 1.013                                       |
| Final R indices [I>2sigma(I)]     | R1 = 0.0460, wR2 = 0.1087                   |
| R indices (all data)              | R1 = 0.0600, wR2 = 0.1126                   |
| Largest diff. peak and hole       | 0.226 and -0.279 e.Å <sup>-3</sup>          |

**Table 2. Atomic coordinates ( x 10<sup>4</sup>) and equivalent isotropic displacement parameters (Å<sup>2</sup>x 10<sup>3</sup>) for DRB\_MS\_130218\_G\_RB1. U(eq) is defined as one third of the trace of the orthogonalized U<sup>ij</sup> tensor.**

|      | x        | y       | z       | U(eq) |
|------|----------|---------|---------|-------|
| O(1) | 26(3)    | 3346(1) | 3528(1) | 20(1) |
| O(2) | -1888(3) | 5167(2) | 3834(1) | 25(1) |
| N(1) | -2187(4) | 4260(2) | 910(2)  | 29(1) |
| C(1) | 2299(4)  | 4353(2) | 1607(2) | 17(1) |
| C(2) | 3130(4)  | 3186(2) | 2264(2) | 19(1) |
| C(3) | 2655(4)  | 3448(2) | 3422(2) | 18(1) |
| C(4) | 2415(4)  | 4876(2) | 3522(2) | 17(1) |
| C(5) | 2834(4)  | 5426(2) | 2420(2) | 20(1) |
| C(6) | -227(4)  | 4286(2) | 1214(2) | 20(1) |
| C(7) | 3996(4)  | 2697(2) | 4296(2) | 24(1) |
| C(8) | -138(4)  | 4594(2) | 3664(2) | 19(1) |

**Figure S11. Single crystal X-ray structure (ORTEP) of amide (–)-24.** The crystals were grown from a concentrated solution of amide (–)-24 in Et<sub>2</sub>O/pentane (1:1 v/v, 0.5 mL), using a slow evaporation method (probability ellipsoids are shown at the 50% level). X-ray crystallographic data have been deposited in the Cambridge Crystallographic Data Centre database (<http://www.ccdc.cam.ac.uk/>) under accession code CCDC 927697.

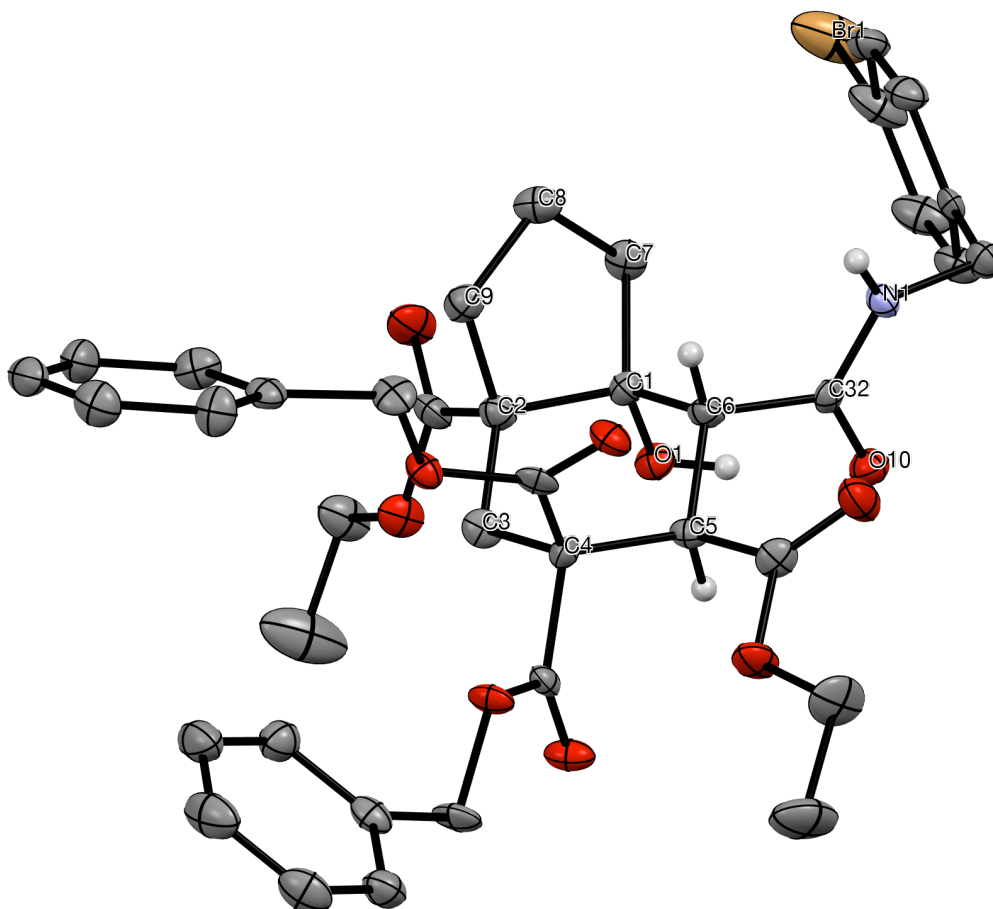

**Table 1. Crystal data and structure refinement for DRB\_KV\_130207\_G\_94.**

|                      |                                                      |                 |
|----------------------|------------------------------------------------------|-----------------|
| Identification code  | drb                                                  |                 |
| Empirical formula    | C <sub>39</sub> H <sub>42</sub> Br N O <sub>10</sub> |                 |
| Formula weight       | 764.65                                               |                 |
| Temperature          | 110(2) K                                             |                 |
| Wavelength           | 1.54178 Å                                            |                 |
| Crystal system       | Triclinic                                            |                 |
| Space group          | P1                                                   |                 |
| Unit cell dimensions | a = 8.0123(4) Å                                      | α = 76.698(4)°. |
|                      | b = 9.5367(5) Å                                      | β = 83.324(4)°. |
|                      | c = 12.5723(7) Å                                     | γ = 77.616(4)°. |
| Volume               | 910.87(8) Å <sup>3</sup>                             |                 |
| Z                    | 1                                                    |                 |
| Density (calculated) | 1.394 Mg/m <sup>3</sup>                              |                 |

|                                               |                                             |
|-----------------------------------------------|---------------------------------------------|
| Absorption coefficient                        | 2.036 mm <sup>-1</sup>                      |
| F(000)                                        | 398                                         |
| Crystal size                                  | 0.36 x 0.06 x 0.04 mm <sup>3</sup>          |
| Theta range for data collection               | 3.62 to 59.99°.                             |
| Index ranges                                  | -8<=h<=8, -10<=k<=10, -14<=l<=14            |
| Reflections collected                         | 10251                                       |
| Independent reflections                       | 4623 [R(int) = 0.0470]                      |
| Completeness to theta = 59.99°                | 94.4 %                                      |
| Absorption correction                         | Semi-empirical from equivalents             |
| Max. and min. transmission                    | 0.9230 and 0.5277                           |
| Refinement method                             | Full-matrix least-squares on F <sup>2</sup> |
| Data / restraints / parameters                | 4623 / 3 / 464                              |
| Goodness-of-fit on F <sup>2</sup>             | 1.072                                       |
| Final R indices [I>2sigma(I)]                 | R1 = 0.0401, wR2 = 0.0962                   |
| R indices (all data)                          | R1 = 0.0465, wR2 = 0.1031                   |
| Absolute structure parameter [Flack / Hoofit] | [0.03(2) / 0.04(1)]                         |
| Extinction coefficient                        | 0.0281(12)                                  |
| Largest diff. peak and hole                   | 0.342 and -0.611 e.Å <sup>-3</sup>          |

**Table 2. Atomic coordinates ( x 10<sup>4</sup>) and equivalent isotropic displacement parameters (Å<sup>2</sup>x 10<sup>3</sup>) for DRB\_KV\_130207\_G\_94. U(eq) is defined as one third of the trace of the orthogonalized U<sup>ij</sup> tensor.**

|       | x        | y        | z        | U(eq) |
|-------|----------|----------|----------|-------|
| O(1)  | 1413(4)  | 1827(3)  | 11000(2) | 20(1) |
| O(2)  | -138(4)  | 5371(4)  | 10656(3) | 32(1) |
| O(3)  | 2720(4)  | 4695(3)  | 10515(3) | 25(1) |
| O(4)  | 1481(4)  | 2017(3)  | 6731(2)  | 22(1) |
| O(5)  | 2309(4)  | 4176(3)  | 6591(2)  | 19(1) |
| O(6)  | 6103(3)  | 1405(3)  | 8573(2)  | 23(1) |
| O(7)  | 5556(3)  | 2419(3)  | 6822(2)  | 19(1) |
| O(8)  | 1823(4)  | -1155(4) | 8247(3)  | 31(1) |
| O(9)  | 4431(4)  | -591(3)  | 7747(3)  | 27(1) |
| O(10) | 1120(4)  | -871(3)  | 10821(3) | 22(1) |
| N(1)  | -1298(5) | -441(4)  | 9920(3)  | 18(1) |
| C(1)  | 458(5)   | 2384(5)  | 10047(3) | 18(1) |
| C(2)  | 1102(5)  | 3801(5)  | 9400(4)  | 19(1) |
| C(3)  | 2888(5)  | 3451(5)  | 8826(4)  | 18(1) |
| C(4)  | 3154(5)  | 2265(4)  | 8130(4)  | 16(1) |
| C(5)  | 2582(5)  | 874(5)   | 8823(3)  | 16(1) |
| C(6)  | 734(5)   | 1216(5)  | 9324(4)  | 18(1) |
| C(7)  | -1458(6) | 2946(5)  | 10309(4) | 22(1) |
| C(8)  | -2038(6) | 4156(6)  | 9302(4)  | 28(1) |
| C(9)  | -398(6)  | 4595(5)  | 8682(4)  | 22(1) |

|       |          |          |          |       |
|-------|----------|----------|----------|-------|
| C(10) | 1136(6)  | 4706(5)  | 10255(4) | 24(1) |
| C(11) | 2788(6)  | 5484(6)  | 11376(5) | 33(1) |
| C(12) | 4597(8)  | 5506(9)  | 11477(6) | 64(2) |
| C(13) | 2222(5)  | 2789(5)  | 7082(4)  | 17(1) |
| C(14) | 1334(6)  | 4749(5)  | 5615(4)  | 22(1) |
| C(15) | 1567(5)  | 6296(5)  | 5169(4)  | 20(1) |
| C(16) | 1276(6)  | 7320(5)  | 5816(4)  | 25(1) |
| C(17) | 1415(6)  | 8756(6)  | 5368(5)  | 29(1) |
| C(18) | 1826(6)  | 9214(6)  | 4246(4)  | 27(1) |
| C(19) | 2148(6)  | 8174(6)  | 3597(4)  | 29(1) |
| C(20) | 2013(6)  | 6726(6)  | 4056(4)  | 27(1) |
| C(21) | 5104(5)  | 1944(5)  | 7871(4)  | 16(1) |
| C(22) | 7392(5)  | 2319(6)  | 6527(4)  | 24(1) |
| C(23) | 7597(5)  | 3272(5)  | 5399(4)  | 21(1) |
| C(24) | 6689(6)  | 4689(5)  | 5150(4)  | 25(1) |
| C(25) | 6921(6)  | 5554(6)  | 4125(4)  | 34(1) |
| C(26) | 8055(7)  | 5017(7)  | 3354(5)  | 39(2) |
| C(27) | 8978(6)  | 3582(6)  | 3582(4)  | 32(1) |
| C(28) | 8729(6)  | 2720(5)  | 4615(4)  | 26(1) |
| C(29) | 2834(6)  | -374(5)  | 8246(4)  | 21(1) |
| C(30) | 4920(7)  | -1819(6) | 7213(5)  | 37(1) |
| C(31) | 6754(6)  | -1940(7) | 6845(6)  | 48(2) |
| C(32) | 203(5)   | -153(5)  | 10070(4) | 15(1) |
| C(33) | -2153(6) | -1436(5) | 10754(4) | 22(1) |
| Br(1) | -5455(1) | 1769(1)  | 14453(1) | 55(1) |
| C(34) | -2984(5) | -700(5)  | 11682(4) | 18(1) |
| C(35) | -2182(6) | -935(6)  | 12653(4) | 26(1) |
| C(36) | -2913(6) | -193(6)  | 13465(4) | 32(1) |
| C(37) | -4435(6) | 786(6)   | 13320(4) | 34(1) |
| C(38) | -5253(6) | 1058(5)  | 12357(4) | 23(1) |
| C(39) | -4535(5) | 302(5)   | 11565(4) | 25(1) |

---
